# Supplementary material
Source: publisher figshare collection journal article supplement (https://gsajournals.figshare.com/ndownloader/files/28321929)
Supplement: Supplementary file 1 [file 28321929]

## Sheet: Table S11
Table S11 Overall gene coexpression network
	#Node1	Node_Degree	Gene_Id	Gene_Name	Regulation	Node2	Node_Degree	Gene_Id	Gene_Name	Regulation	Correlation	P.value	edges_sign
1	Glyma.01G002000	5	Glyma.01G002000	Glyma.01G002000	mixed_up_down	Glyma.01G021900	2	Glyma.01G021900	Glyma.01G021900	mixed_up_down	0.991506	3.43317e-10	1
	Glyma.01G002000	5	Glyma.01G002000	Glyma.01G002000	mixed_up_down	Glyma.03G030900	7	Glyma.03G030900	Glyma.03G030900	mixed_up_down	0.996113	6.94333e-12	1
	Glyma.01G002000	5	Glyma.01G002000	Glyma.01G002000	mixed_up_down	Glyma.14G118100	2	Glyma.14G118100	Glyma.14G118100	mixed_up_down	0.990417	6.26236e-10	1
	Glyma.01G002000	5	Glyma.01G002000	Glyma.01G002000	mixed_up_down	Glyma.15G223000	1	Glyma.15G223000	Glyma.15G223000	down	0.991832	2.82349e-10	1
	Glyma.01G002000	5	Glyma.01G002000	Glyma.01G002000	mixed_up_down	Glyma.17G073200	10	Glyma.17G073200	Glyma.17G073200	mixed_up_down	0.993133	1.18914e-10	1
2	Glyma.01G005600	51	Glyma.01G005600	Glyma.01G005600	down	Glyma.02G031400	78	Glyma.02G031400	Glyma.02G031400	mixed_up_down	0.994517	3.86686e-11	1
	Glyma.01G005600	51	Glyma.01G005600	Glyma.01G005600	down	Glyma.02G142500	82	Glyma.02G142500	Glyma.02G142500	mixed_up_down	0.99029	6.68686e-10	1
	Glyma.01G005600	51	Glyma.01G005600	Glyma.01G005600	down	Glyma.02G299500	82	Glyma.02G299500	Glyma.02G299500	mixed_up_down	0.991078	4.38558e-10	1
	Glyma.01G005600	51	Glyma.01G005600	Glyma.01G005600	down	Glyma.03G049500	82	Glyma.03G049500	Glyma.03G049500	mixed_up_down	0.991034	4.49539e-10	1
	Glyma.01G005600	51	Glyma.01G005600	Glyma.01G005600	down	Glyma.03G094800	82	Glyma.03G094800	Glyma.03G094800	mixed_up_down	0.991078	4.38558e-10	1
	Glyma.01G005600	51	Glyma.01G005600	Glyma.01G005600	down	Glyma.03G158600	84	Glyma.03G158600	Glyma.03G158600	mixed_up_down	0.990282	6.71633e-10	1
	Glyma.01G005600	51	Glyma.01G005600	Glyma.01G005600	down	Glyma.03G158700	80	Glyma.03G158700	Glyma.03G158700	down	0.993294	1.0559e-10	1
	Glyma.01G005600	51	Glyma.01G005600	Glyma.01G005600	down	Glyma.03G210700	82	Glyma.03G210700	Glyma.03G210700	mixed_up_down	0.990606	5.67278e-10	1
	Glyma.01G005600	51	Glyma.01G005600	Glyma.01G005600	down	Glyma.04G094800	82	Glyma.04G094800	Glyma.04G094800	mixed_up_down	0.991078	4.38558e-10	1
	Glyma.01G005600	51	Glyma.01G005600	Glyma.01G005600	down	Glyma.05G037200	83	Glyma.05G037200	Glyma.05G037200	mixed_up_down	0.992962	1.34441e-10	1
	Glyma.01G005600	51	Glyma.01G005600	Glyma.01G005600	down	Glyma.05G109600	84	Glyma.05G109600	Glyma.05G109600	mixed_up_down	0.993943	6.35372e-11	1
	Glyma.01G005600	51	Glyma.01G005600	Glyma.01G005600	down	Glyma.05G126400	82	Glyma.05G126400	Glyma.05G126400	up	0.992231	2.20062e-10	1
	Glyma.01G005600	51	Glyma.01G005600	Glyma.01G005600	down	Glyma.05G197900	82	Glyma.05G197900	Glyma.05G197900	up	0.991491	3.46283e-10	1
	Glyma.01G005600	51	Glyma.01G005600	Glyma.01G005600	down	Glyma.06G006800	82	Glyma.06G006800	Glyma.06G006800	mixed_up_down	0.993058	1.25498e-10	1
	Glyma.01G005600	51	Glyma.01G005600	Glyma.01G005600	down	Glyma.06G282200	84	Glyma.06G282200	Glyma.06G282200	mixed_up_down	0.990775	5.18112e-10	1
	Glyma.01G005600	51	Glyma.01G005600	Glyma.01G005600	down	Glyma.06G282400	82	Glyma.06G282400	Glyma.06G282400	mixed_up_down	0.99089	4.86544e-10	1
	Glyma.01G005600	51	Glyma.01G005600	Glyma.01G005600	down	Glyma.06G282600	82	Glyma.06G282600	Glyma.06G282600	mixed_up_down	0.990969	4.6601e-10	1
	Glyma.01G005600	51	Glyma.01G005600	Glyma.01G005600	down	Glyma.06G282900	82	Glyma.06G282900	Glyma.06G282900	up	0.991078	4.38558e-10	1
	Glyma.01G005600	51	Glyma.01G005600	Glyma.01G005600	down	Glyma.08G009900	82	Glyma.08G009900	Glyma.08G009900	mixed_up_down	0.993054	1.25878e-10	1
	Glyma.01G005600	51	Glyma.01G005600	Glyma.01G005600	down	Glyma.08G155400	82	Glyma.08G155400	Glyma.08G155400	mixed_up_down	0.991078	4.38558e-10	1
	Glyma.01G005600	51	Glyma.01G005600	Glyma.01G005600	down	Glyma.08G155500	82	Glyma.08G155500	Glyma.08G155500	mixed_up_down	0.991078	4.38558e-10	1
	Glyma.01G005600	51	Glyma.01G005600	Glyma.01G005600	down	Glyma.08G232100	28	Glyma.08G232100	Glyma.08G232100	mixed_up_down	0.991535	3.3746e-10	1
	Glyma.01G005600	51	Glyma.01G005600	Glyma.01G005600	down	Glyma.08G232200	84	Glyma.08G232200	Glyma.08G232200	mixed_up_down	0.990002	7.73686e-10	1
	Glyma.01G005600	51	Glyma.01G005600	Glyma.01G005600	down	Glyma.08G342300	82	Glyma.08G342300	Glyma.08G342300	mixed_up_down	0.991078	4.38558e-10	1
	Glyma.01G005600	51	Glyma.01G005600	Glyma.01G005600	down	Glyma.09G221800	82	Glyma.09G221800	Glyma.09G221800	mixed_up_down	0.990736	5.28952e-10	1
	Glyma.01G005600	51	Glyma.01G005600	Glyma.01G005600	down	Glyma.10G017000	82	Glyma.10G017000	Glyma.10G017000	mixed_up_down	0.991078	4.38558e-10	1
	Glyma.01G005600	51	Glyma.01G005600	Glyma.01G005600	down	Glyma.10G296600	84	Glyma.10G296600	Glyma.10G296600	mixed_up_down	0.990403	6.30938e-10	1
	Glyma.01G005600	51	Glyma.01G005600	Glyma.01G005600	down	Glyma.11G179100	82	Glyma.11G179100	Glyma.11G179100	mixed_up_down	0.991262	3.95401e-10	1
	Glyma.01G005600	51	Glyma.01G005600	Glyma.01G005600	down	Glyma.12G035200	18	Glyma.12G035200	Glyma.12G035200	mixed_up_down	0.990462	6.11878e-10	1
	Glyma.01G005600	51	Glyma.01G005600	Glyma.01G005600	down	Glyma.12G124100	82	Glyma.12G124100	Glyma.12G124100	mixed_up_down	0.991078	4.38558e-10	1
	Glyma.01G005600	51	Glyma.01G005600	Glyma.01G005600	down	Glyma.12G124200	82	Glyma.12G124200	Glyma.12G124200	mixed_up_down	0.991078	4.38558e-10	1
	Glyma.01G005600	51	Glyma.01G005600	Glyma.01G005600	down	Glyma.12G124900	82	Glyma.12G124900	Glyma.12G124900	mixed_up_down	0.991078	4.38558e-10	1
	Glyma.01G005600	51	Glyma.01G005600	Glyma.01G005600	down	Glyma.13G091400	82	Glyma.13G091400	Glyma.13G091400	mixed_up_down	0.991078	4.38558e-10	1
	Glyma.01G005600	51	Glyma.01G005600	Glyma.01G005600	down	Glyma.13G165000	85	Glyma.13G165000	Glyma.13G165000	mixed_up_down	0.992395	1.97862e-10	1
	Glyma.01G005600	51	Glyma.01G005600	Glyma.01G005600	down	Glyma.13G240500	83	Glyma.13G240500	Glyma.13G240500	down	0.992112	2.37409e-10	1
	Glyma.01G005600	51	Glyma.01G005600	Glyma.01G005600	down	Glyma.13G319700	84	Glyma.13G319700	Glyma.13G319700	mixed_up_down	0.990168	7.11886e-10	1
	Glyma.01G005600	51	Glyma.01G005600	Glyma.01G005600	down	Glyma.15G066200	82	Glyma.15G066200	Glyma.15G066200	mixed_up_down	0.991078	4.38558e-10	1
	Glyma.01G005600	51	Glyma.01G005600	Glyma.01G005600	down	Glyma.16G129600	76	Glyma.16G129600	Glyma.16G129600	mixed_up_down	0.992419	1.94697e-10	1
	Glyma.01G005600	51	Glyma.01G005600	Glyma.01G005600	down	Glyma.17G027300	82	Glyma.17G027300	Glyma.17G027300	mixed_up_down	0.990501	5.99516e-10	1
	Glyma.01G005600	51	Glyma.01G005600	Glyma.01G005600	down	Glyma.17G106100	84	Glyma.17G106100	Glyma.17G106100	mixed_up_down	0.994065	5.74252e-11	1
	Glyma.01G005600	51	Glyma.01G005600	Glyma.01G005600	down	Glyma.17G139400	82	Glyma.17G139400	Glyma.17G139400	mixed_up_down	0.990921	4.78555e-10	1
	Glyma.01G005600	51	Glyma.01G005600	Glyma.01G005600	down	Glyma.17G157400	83	Glyma.17G157400	Glyma.17G157400	mixed_up_down	0.993164	1.16248e-10	1
	Glyma.01G005600	51	Glyma.01G005600	Glyma.01G005600	down	Glyma.18G054000	82	Glyma.18G054000	Glyma.18G054000	up	0.99064	5.56938e-10	1
	Glyma.01G005600	51	Glyma.01G005600	Glyma.01G005600	down	Glyma.18G078200	17	Glyma.18G078200	Glyma.18G078200	mixed_up_down	0.990284	6.71002e-10	1
	Glyma.01G005600	51	Glyma.01G005600	Glyma.01G005600	down	Glyma.18G215100	85	Glyma.18G215100	Glyma.18G215100	mixed_up_down	0.990025	7.64981e-10	1
	Glyma.01G005600	51	Glyma.01G005600	Glyma.01G005600	down	Glyma.18G225000	82	Glyma.18G225000	Glyma.18G225000	mixed_up_down	0.990962	4.67751e-10	1
	Glyma.01G005600	51	Glyma.01G005600	Glyma.01G005600	down	Glyma.19G161100	84	Glyma.19G161100	Glyma.19G161100	down	0.993151	1.17374e-10	1
	Glyma.01G005600	51	Glyma.01G005600	Glyma.01G005600	down	Glyma.20G034100	81	Glyma.20G034100	Glyma.20G034100	mixed_up_down	0.99063	5.59954e-10	1
	Glyma.01G005600	51	Glyma.01G005600	Glyma.01G005600	down	Glyma.20G247400	84	Glyma.20G247400	Glyma.20G247400	mixed_up_down	0.990687	5.43086e-10	1
	Glyma.01G005600	51	Glyma.01G005600	Glyma.01G005600	down	XLOC_001320	76	XLOC_001320	XLOC_001320	down	0.991037	4.48709e-10	1
	Glyma.01G005600	51	Glyma.01G005600	Glyma.01G005600	down	XLOC_029029	82	XLOC_029029	XLOC_029029	mixed_up_down	0.991078	4.38558e-10	1
3	Glyma.01G013200	7	Glyma.01G013200	Glyma.01G013200	mixed_up_down	Glyma.04G047600	7	Glyma.04G047600	Glyma.04G047600	up	0.99023	6.89562e-10	1
	Glyma.01G013200	7	Glyma.01G013200	Glyma.01G013200	mixed_up_down	Glyma.08G163400	41	Glyma.08G163400	Glyma.08G163400	mixed_up_down	0.990103	7.35668e-10	1
	Glyma.01G013200	7	Glyma.01G013200	Glyma.01G013200	mixed_up_down	Glyma.09G068700	14	Glyma.09G068700	Glyma.09G068700	up	0.990486	6.04325e-10	1
	Glyma.01G013200	7	Glyma.01G013200	Glyma.01G013200	mixed_up_down	Glyma.13G204300	34	Glyma.13G204300	Glyma.13G204300	mixed_up_down	0.990331	6.54752e-10	1
	Glyma.01G013200	7	Glyma.01G013200	Glyma.01G013200	mixed_up_down	Glyma.14G158900	5	Glyma.14G158900	Glyma.14G158900	mixed_up_down	0.991041	4.4779e-10	1
	Glyma.01G013200	7	Glyma.01G013200	Glyma.01G013200	mixed_up_down	Glyma.18G044000	3	Glyma.18G044000	Glyma.18G044000	mixed_up_down	0.994428	4.18992e-11	1
	Glyma.01G013200	7	Glyma.01G013200	Glyma.01G013200	mixed_up_down	Glyma.20G073000	7	Glyma.20G073000	Glyma.20G073000	mixed_up_down	0.990899	4.8427e-10	1
4	Glyma.01G013300	36	Glyma.01G013300	Glyma.01G013300	mixed_up_down	Glyma.01G014100	38	Glyma.01G014100	Glyma.01G014100	mixed_up_down	0.997788	4.15668e-13	1
	Glyma.01G013300	36	Glyma.01G013300	Glyma.01G013300	mixed_up_down	Glyma.01G030000	48	Glyma.01G030000	Glyma.01G030000	up	0.997072	1.68754e-12	1
	Glyma.01G013300	36	Glyma.01G013300	Glyma.01G013300	mixed_up_down	Glyma.01G062900	33	Glyma.01G062900	Glyma.01G062900	mixed_up_down	0.998491	6.15064e-14	1
	Glyma.01G013300	36	Glyma.01G013300	Glyma.01G013300	mixed_up_down	Glyma.02G063600	25	Glyma.02G063600	Glyma.02G063600	mixed_up_down	0.992118	2.36384e-10	1
	Glyma.01G013300	36	Glyma.01G013300	Glyma.01G013300	mixed_up_down	Glyma.02G241400	38	Glyma.02G241400	Glyma.02G241400	up	0.995892	9.15357e-12	1
	Glyma.01G013300	36	Glyma.01G013300	Glyma.01G013300	mixed_up_down	Glyma.04G003200	48	Glyma.04G003200	Glyma.04G003200	mixed_up_down	0.994568	3.6914e-11	1
	Glyma.01G013300	36	Glyma.01G013300	Glyma.01G013300	mixed_up_down	Glyma.04G167800	34	Glyma.04G167800	Glyma.04G167800	mixed_up_down	0.999146	3.55271e-15	1
	Glyma.01G013300	36	Glyma.01G013300	Glyma.01G013300	mixed_up_down	Glyma.04G172500	36	Glyma.04G172500	Glyma.04G172500	mixed_up_down	0.998825	1.75415e-14	1
	Glyma.01G013300	36	Glyma.01G013300	Glyma.01G013300	mixed_up_down	Glyma.04G192500	46	Glyma.04G192500	Glyma.04G192500	mixed_up_down	0.997686	5.20473e-13	1
	Glyma.01G013300	36	Glyma.01G013300	Glyma.01G013300	mixed_up_down	Glyma.04G198500	35	Glyma.04G198500	Glyma.04G198500	mixed_up_down	0.9989	1.26565e-14	1
	Glyma.01G013300	36	Glyma.01G013300	Glyma.01G013300	mixed_up_down	Glyma.05G213700	42	Glyma.05G213700	Glyma.05G213700	mixed_up_down	0.997374	9.78773e-13	1
	Glyma.01G013300	36	Glyma.01G013300	Glyma.01G013300	mixed_up_down	Glyma.05G241900	41	Glyma.05G241900	Glyma.05G241900	up	0.995365	1.67195e-11	1
	Glyma.01G013300	36	Glyma.01G013300	Glyma.01G013300	mixed_up_down	Glyma.06G160400	38	Glyma.06G160400	Glyma.06G160400	mixed_up_down	0.998913	1.19904e-14	1
	Glyma.01G013300	36	Glyma.01G013300	Glyma.01G013300	mixed_up_down	Glyma.06G173300	25	Glyma.06G173300	Glyma.06G173300	up	0.996786	2.6863e-12	1
	Glyma.01G013300	36	Glyma.01G013300	Glyma.01G013300	mixed_up_down	Glyma.06G313500	33	Glyma.06G313500	Glyma.06G313500	mixed_up_down	0.99366	7.98281e-11	1
	Glyma.01G013300	36	Glyma.01G013300	Glyma.01G013300	mixed_up_down	Glyma.08G120300	37	Glyma.08G120300	Glyma.08G120300	mixed_up_down	0.998941	1.06581e-14	1
	Glyma.01G013300	36	Glyma.01G013300	Glyma.01G013300	mixed_up_down	Glyma.08G163400	41	Glyma.08G163400	Glyma.08G163400	mixed_up_down	0.996104	7.01883e-12	1
	Glyma.01G013300	36	Glyma.01G013300	Glyma.01G013300	mixed_up_down	Glyma.08G212800	33	Glyma.08G212800	Glyma.08G212800	down	0.995966	8.35332e-12	1
	Glyma.01G013300	36	Glyma.01G013300	Glyma.01G013300	mixed_up_down	Glyma.08G224800	39	Glyma.08G224800	Glyma.08G224800	mixed_up_down	0.990609	5.66106e-10	1
	Glyma.01G013300	36	Glyma.01G013300	Glyma.01G013300	mixed_up_down	Glyma.08G253200	39	Glyma.08G253200	Glyma.08G253200	down	0.995798	1.02467e-11	1
	Glyma.01G013300	36	Glyma.01G013300	Glyma.01G013300	mixed_up_down	Glyma.09G063000	22	Glyma.09G063000	Glyma.09G063000	up	0.994506	3.90488e-11	1
	Glyma.01G013300	36	Glyma.01G013300	Glyma.01G013300	mixed_up_down	Glyma.09G229400	10	Glyma.09G229400	Glyma.09G229400	mixed_up_down	0.991966	2.60036e-10	1
	Glyma.01G013300	36	Glyma.01G013300	Glyma.01G013300	mixed_up_down	Glyma.10G043400	26	Glyma.10G043400	Glyma.10G043400	up	0.995251	1.88636e-11	1
	Glyma.01G013300	36	Glyma.01G013300	Glyma.01G013300	mixed_up_down	Glyma.10G164100	35	Glyma.10G164100	Glyma.10G164100	mixed_up_down	0.998652	3.5083e-14	1
	Glyma.01G013300	36	Glyma.01G013300	Glyma.01G013300	mixed_up_down	Glyma.10G172200	32	Glyma.10G172200	Glyma.10G172200	mixed_up_down	0.996422	4.59055e-12	1
	Glyma.01G013300	36	Glyma.01G013300	Glyma.01G013300	mixed_up_down	Glyma.10G248800	37	Glyma.10G248800	Glyma.10G248800	mixed_up_down	0.99196	2.61072e-10	1
	Glyma.01G013300	36	Glyma.01G013300	Glyma.01G013300	mixed_up_down	Glyma.11G244300	32	Glyma.11G244300	Glyma.11G244300	mixed_up_down	0.999278	1.55431e-15	1
	Glyma.01G013300	36	Glyma.01G013300	Glyma.01G013300	mixed_up_down	Glyma.13G177600	38	Glyma.13G177600	Glyma.13G177600	mixed_up_down	0.997767	4.35652e-13	1
	Glyma.01G013300	36	Glyma.01G013300	Glyma.01G013300	mixed_up_down	Glyma.13G204300	34	Glyma.13G204300	Glyma.13G204300	mixed_up_down	0.994505	3.90923e-11	1
	Glyma.01G013300	36	Glyma.01G013300	Glyma.01G013300	mixed_up_down	Glyma.14G189500	33	Glyma.14G189500	Glyma.14G189500	mixed_up_down	0.996957	2.04503e-12	1
	Glyma.01G013300	36	Glyma.01G013300	Glyma.01G013300	mixed_up_down	Glyma.15G011000	30	Glyma.15G011000	Glyma.15G011000	mixed_up_down	0.998007	2.46692e-13	1
	Glyma.01G013300	36	Glyma.01G013300	Glyma.01G013300	mixed_up_down	Glyma.18G003700	11	Glyma.18G003700	Glyma.18G003700	mixed_up_down	0.990115	7.31187e-10	1
	Glyma.01G013300	36	Glyma.01G013300	Glyma.01G013300	mixed_up_down	Glyma.18G109600	36	Glyma.18G109600	Glyma.18G109600	mixed_up_down	0.991161	4.18758e-10	1
	Glyma.01G013300	36	Glyma.01G013300	Glyma.01G013300	mixed_up_down	Glyma.18G244600	27	Glyma.18G244600	Glyma.18G244600	mixed_up_down	0.990752	5.24439e-10	1
	Glyma.01G013300	36	Glyma.01G013300	Glyma.01G013300	mixed_up_down	Glyma.20G131100	36	Glyma.20G131100	Glyma.20G131100	mixed_up_down	0.998454	6.92779e-14	1
	Glyma.01G013300	36	Glyma.01G013300	Glyma.01G013300	mixed_up_down	XLOC_022764	35	XLOC_022764	XLOC_022764	mixed_up_down	0.998263	1.24123e-13	1
5	Glyma.01G013500	3	Glyma.01G013500	Glyma.01G013500	mixed_up_down	Glyma.12G208800	2	Glyma.12G208800	Glyma.12G208800	mixed_up_down	0.998033	2.3137e-13	1
	Glyma.01G013500	3	Glyma.01G013500	Glyma.01G013500	mixed_up_down	Glyma.17G138800	4	Glyma.17G138800	Glyma.17G138800	mixed_up_down	0.990166	7.12535e-10	1
	Glyma.01G013500	3	Glyma.01G013500	Glyma.01G013500	mixed_up_down	Glyma.18G148100	2	Glyma.18G148100	Glyma.18G148100	mixed_up_down	0.995802	1.01916e-11	1
6	Glyma.01G014100	38	Glyma.01G014100	Glyma.01G014100	mixed_up_down	Glyma.01G030000	48	Glyma.01G030000	Glyma.01G030000	up	0.996342	5.12479e-12	1
	Glyma.01G014100	38	Glyma.01G014100	Glyma.01G014100	mixed_up_down	Glyma.01G062900	33	Glyma.01G062900	Glyma.01G062900	mixed_up_down	0.998309	1.08358e-13	1
	Glyma.01G014100	38	Glyma.01G014100	Glyma.01G014100	mixed_up_down	Glyma.02G063600	25	Glyma.02G063600	Glyma.02G063600	mixed_up_down	0.992059	2.45426e-10	1
	Glyma.01G014100	38	Glyma.01G014100	Glyma.01G014100	mixed_up_down	Glyma.02G241400	38	Glyma.02G241400	Glyma.02G241400	up	0.9985	5.9508e-14	1
	Glyma.01G014100	38	Glyma.01G014100	Glyma.01G014100	mixed_up_down	Glyma.04G003200	48	Glyma.04G003200	Glyma.04G003200	mixed_up_down	0.99681	2.58726e-12	1
	Glyma.01G014100	38	Glyma.01G014100	Glyma.01G014100	mixed_up_down	Glyma.04G167800	34	Glyma.04G167800	Glyma.04G167800	mixed_up_down	0.99803	2.33147e-13	1
	Glyma.01G014100	38	Glyma.01G014100	Glyma.01G014100	mixed_up_down	Glyma.04G172500	36	Glyma.04G172500	Glyma.04G172500	mixed_up_down	0.998196	1.50102e-13	1
	Glyma.01G014100	38	Glyma.01G014100	Glyma.01G014100	mixed_up_down	Glyma.04G192500	46	Glyma.04G192500	Glyma.04G192500	mixed_up_down	0.997613	6.07514e-13	1
	Glyma.01G014100	38	Glyma.01G014100	Glyma.01G014100	mixed_up_down	Glyma.04G198500	35	Glyma.04G198500	Glyma.04G198500	mixed_up_down	0.998251	1.28786e-13	1
	Glyma.01G014100	38	Glyma.01G014100	Glyma.01G014100	mixed_up_down	Glyma.05G213700	42	Glyma.05G213700	Glyma.05G213700	mixed_up_down	0.998934	1.08802e-14	1
	Glyma.01G014100	38	Glyma.01G014100	Glyma.01G014100	mixed_up_down	Glyma.05G241900	41	Glyma.05G241900	Glyma.05G241900	up	0.999111	4.44089e-15	1
	Glyma.01G014100	38	Glyma.01G014100	Glyma.01G014100	mixed_up_down	Glyma.06G160400	38	Glyma.06G160400	Glyma.06G160400	mixed_up_down	0.999097	4.66294e-15	1
	Glyma.01G014100	38	Glyma.01G014100	Glyma.01G014100	mixed_up_down	Glyma.06G173300	25	Glyma.06G173300	Glyma.06G173300	up	0.993565	8.59672e-11	1
	Glyma.01G014100	38	Glyma.01G014100	Glyma.01G014100	mixed_up_down	Glyma.06G313500	33	Glyma.06G313500	Glyma.06G313500	mixed_up_down	0.997391	9.4813e-13	1
	Glyma.01G014100	38	Glyma.01G014100	Glyma.01G014100	mixed_up_down	Glyma.08G120300	37	Glyma.08G120300	Glyma.08G120300	mixed_up_down	0.998413	7.90479e-14	1
	Glyma.01G014100	38	Glyma.01G014100	Glyma.01G014100	mixed_up_down	Glyma.08G163400	41	Glyma.08G163400	Glyma.08G163400	mixed_up_down	0.998895	1.28786e-14	1
	Glyma.01G014100	38	Glyma.01G014100	Glyma.01G014100	mixed_up_down	Glyma.08G201400	27	Glyma.08G201400	Glyma.08G201400	mixed_up_down	0.993643	8.08655e-11	1
	Glyma.01G014100	38	Glyma.01G014100	Glyma.01G014100	mixed_up_down	Glyma.08G212800	33	Glyma.08G212800	Glyma.08G212800	down	0.997735	4.67404e-13	1
	Glyma.01G014100	38	Glyma.01G014100	Glyma.01G014100	mixed_up_down	Glyma.08G224800	39	Glyma.08G224800	Glyma.08G224800	mixed_up_down	0.996056	7.46248e-12	1
	Glyma.01G014100	38	Glyma.01G014100	Glyma.01G014100	mixed_up_down	Glyma.08G253200	39	Glyma.08G253200	Glyma.08G253200	down	0.997158	1.45395e-12	1
	Glyma.01G014100	38	Glyma.01G014100	Glyma.01G014100	mixed_up_down	Glyma.09G063000	22	Glyma.09G063000	Glyma.09G063000	up	0.99063	5.59812e-10	1
	Glyma.01G014100	38	Glyma.01G014100	Glyma.01G014100	mixed_up_down	Glyma.09G080700	22	Glyma.09G080700	Glyma.09G080700	mixed_up_down	0.992033	2.49458e-10	1
	Glyma.01G014100	38	Glyma.01G014100	Glyma.01G014100	mixed_up_down	Glyma.10G043400	26	Glyma.10G043400	Glyma.10G043400	up	0.995056	2.30702e-11	1
	Glyma.01G014100	38	Glyma.01G014100	Glyma.01G014100	mixed_up_down	Glyma.10G164100	35	Glyma.10G164100	Glyma.10G164100	mixed_up_down	0.997825	3.82361e-13	1
	Glyma.01G014100	38	Glyma.01G014100	Glyma.01G014100	mixed_up_down	Glyma.10G172200	32	Glyma.10G172200	Glyma.10G172200	mixed_up_down	0.997168	1.4273e-12	1
	Glyma.01G014100	38	Glyma.01G014100	Glyma.01G014100	mixed_up_down	Glyma.10G248800	37	Glyma.10G248800	Glyma.10G248800	mixed_up_down	0.99563	1.24611e-11	1
	Glyma.01G014100	38	Glyma.01G014100	Glyma.01G014100	mixed_up_down	Glyma.11G244300	32	Glyma.11G244300	Glyma.11G244300	mixed_up_down	0.997414	9.06164e-13	1
	Glyma.01G014100	38	Glyma.01G014100	Glyma.01G014100	mixed_up_down	Glyma.13G177600	38	Glyma.13G177600	Glyma.13G177600	mixed_up_down	0.997059	1.7244e-12	1
	Glyma.01G014100	38	Glyma.01G014100	Glyma.01G014100	mixed_up_down	Glyma.13G204300	34	Glyma.13G204300	Glyma.13G204300	mixed_up_down	0.994491	3.9603e-11	1
	Glyma.01G014100	38	Glyma.01G014100	Glyma.01G014100	mixed_up_down	Glyma.14G189500	33	Glyma.14G189500	Glyma.14G189500	mixed_up_down	0.997005	1.88916e-12	1
	Glyma.01G014100	38	Glyma.01G014100	Glyma.01G014100	mixed_up_down	Glyma.15G011000	30	Glyma.15G011000	Glyma.15G011000	mixed_up_down	0.996504	4.08917e-12	1
	Glyma.01G014100	38	Glyma.01G014100	Glyma.01G014100	mixed_up_down	Glyma.18G109600	36	Glyma.18G109600	Glyma.18G109600	mixed_up_down	0.994222	5.02163e-11	1
	Glyma.01G014100	38	Glyma.01G014100	Glyma.01G014100	mixed_up_down	Glyma.18G244600	27	Glyma.18G244600	Glyma.18G244600	mixed_up_down	0.993106	1.21269e-10	1
	Glyma.01G014100	38	Glyma.01G014100	Glyma.01G014100	mixed_up_down	Glyma.20G052900	23	Glyma.20G052900	Glyma.20G052900	mixed_up_down	0.992758	1.55017e-10	1
	Glyma.01G014100	38	Glyma.01G014100	Glyma.01G014100	mixed_up_down	Glyma.20G131100	36	Glyma.20G131100	Glyma.20G131100	mixed_up_down	0.998494	6.08402e-14	1
	Glyma.01G014100	38	Glyma.01G014100	Glyma.01G014100	mixed_up_down	XLOC_022764	35	XLOC_022764	XLOC_022764	mixed_up_down	0.997364	9.97868e-13	1
	Glyma.01G014100	38	Glyma.01G014100	Glyma.01G014100	mixed_up_down	XLOC_036392	26	XLOC_036392	XLOC_036392	mixed_up_down	0.994558	3.72542e-11	1
7	Glyma.01G021900	2	Glyma.01G021900	Glyma.01G021900	mixed_up_down	Glyma.19G005900	5	Glyma.19G005900	Glyma.19G005900	mixed_up_down	0.994374	4.39813e-11	1
8	Glyma.01G029300	79	Glyma.01G029300	Glyma.01G029300	mixed_up_down	Glyma.02G031400	78	Glyma.02G031400	Glyma.02G031400	mixed_up_down	0.991227	4.03384e-10	1
	Glyma.01G029300	79	Glyma.01G029300	Glyma.01G029300	mixed_up_down	Glyma.02G049200	58	Glyma.02G049200	Glyma.02G049200	mixed_up_down	0.991974	2.58756e-10	1
	Glyma.01G029300	79	Glyma.01G029300	Glyma.01G029300	mixed_up_down	Glyma.02G097400	70	Glyma.02G097400	Glyma.02G097400	up	0.995258	1.87403e-11	1
	Glyma.01G029300	79	Glyma.01G029300	Glyma.01G029300	mixed_up_down	Glyma.02G109100	76	Glyma.02G109100	Glyma.02G109100	mixed_up_down	0.996643	3.34111e-12	1
	Glyma.01G029300	79	Glyma.01G029300	Glyma.01G029300	mixed_up_down	Glyma.02G142500	82	Glyma.02G142500	Glyma.02G142500	mixed_up_down	0.991756	2.95828e-10	1
	Glyma.01G029300	79	Glyma.01G029300	Glyma.01G029300	mixed_up_down	Glyma.02G221900	32	Glyma.02G221900	Glyma.02G221900	mixed_up_down	0.990801	5.10706e-10	1
	Glyma.01G029300	79	Glyma.01G029300	Glyma.01G029300	mixed_up_down	Glyma.02G299500	82	Glyma.02G299500	Glyma.02G299500	mixed_up_down	0.994536	3.80171e-11	1
	Glyma.01G029300	79	Glyma.01G029300	Glyma.01G029300	mixed_up_down	Glyma.03G049500	82	Glyma.03G049500	Glyma.03G049500	mixed_up_down	0.994433	4.17257e-11	1
	Glyma.01G029300	79	Glyma.01G029300	Glyma.01G029300	mixed_up_down	Glyma.03G094800	82	Glyma.03G094800	Glyma.03G094800	mixed_up_down	0.994536	3.80171e-11	1
	Glyma.01G029300	79	Glyma.01G029300	Glyma.01G029300	mixed_up_down	Glyma.03G158600	84	Glyma.03G158600	Glyma.03G158600	mixed_up_down	0.996009	7.92166e-12	1
	Glyma.01G029300	79	Glyma.01G029300	Glyma.01G029300	mixed_up_down	Glyma.03G158700	80	Glyma.03G158700	Glyma.03G158700	down	0.992745	1.56384e-10	1
	Glyma.01G029300	79	Glyma.01G029300	Glyma.01G029300	mixed_up_down	Glyma.03G210700	82	Glyma.03G210700	Glyma.03G210700	mixed_up_down	0.992816	1.48921e-10	1
	Glyma.01G029300	79	Glyma.01G029300	Glyma.01G029300	mixed_up_down	Glyma.04G046600	37	Glyma.04G046600	Glyma.04G046600	mixed_up_down	0.99671	3.02092e-12	1
	Glyma.01G029300	79	Glyma.01G029300	Glyma.01G029300	mixed_up_down	Glyma.04G094800	82	Glyma.04G094800	Glyma.04G094800	mixed_up_down	0.994536	3.80171e-11	1
	Glyma.01G029300	79	Glyma.01G029300	Glyma.01G029300	mixed_up_down	Glyma.05G037200	83	Glyma.05G037200	Glyma.05G037200	mixed_up_down	0.994207	5.08722e-11	1
	Glyma.01G029300	79	Glyma.01G029300	Glyma.01G029300	mixed_up_down	Glyma.05G056300	81	Glyma.05G056300	Glyma.05G056300	mixed_up_down	0.998447	7.10543e-14	1
	Glyma.01G029300	79	Glyma.01G029300	Glyma.01G029300	mixed_up_down	Glyma.05G109600	84	Glyma.05G109600	Glyma.05G109600	mixed_up_down	0.994051	5.81084e-11	1
	Glyma.01G029300	79	Glyma.01G029300	Glyma.01G029300	mixed_up_down	Glyma.05G126400	82	Glyma.05G126400	Glyma.05G126400	up	0.994306	4.66711e-11	1
	Glyma.01G029300	79	Glyma.01G029300	Glyma.01G029300	mixed_up_down	Glyma.05G186300	81	Glyma.05G186300	Glyma.05G186300	mixed_up_down	0.998281	1.18128e-13	1
	Glyma.01G029300	79	Glyma.01G029300	Glyma.01G029300	mixed_up_down	Glyma.05G197900	82	Glyma.05G197900	Glyma.05G197900	up	0.993937	6.38867e-11	1
	Glyma.01G029300	79	Glyma.01G029300	Glyma.01G029300	mixed_up_down	Glyma.06G006800	82	Glyma.06G006800	Glyma.06G006800	mixed_up_down	0.993539	8.77232e-11	1
	Glyma.01G029300	79	Glyma.01G029300	Glyma.01G029300	mixed_up_down	Glyma.06G124200	17	Glyma.06G124200	Glyma.06G124200	mixed_up_down	0.993545	8.72891e-11	1
	Glyma.01G029300	79	Glyma.01G029300	Glyma.01G029300	mixed_up_down	Glyma.06G282200	84	Glyma.06G282200	Glyma.06G282200	mixed_up_down	0.994937	2.59841e-11	1
	Glyma.01G029300	79	Glyma.01G029300	Glyma.01G029300	mixed_up_down	Glyma.06G282400	82	Glyma.06G282400	Glyma.06G282400	mixed_up_down	0.99443	4.18172e-11	1
	Glyma.01G029300	79	Glyma.01G029300	Glyma.01G029300	mixed_up_down	Glyma.06G282500	83	Glyma.06G282500	Glyma.06G282500	mixed_up_down	0.997005	1.8896e-12	1
	Glyma.01G029300	79	Glyma.01G029300	Glyma.01G029300	mixed_up_down	Glyma.06G282600	82	Glyma.06G282600	Glyma.06G282600	mixed_up_down	0.994499	3.92995e-11	1
	Glyma.01G029300	79	Glyma.01G029300	Glyma.01G029300	mixed_up_down	Glyma.06G282700	84	Glyma.06G282700	Glyma.06G282700	mixed_up_down	0.998795	1.9984e-14	1
	Glyma.01G029300	79	Glyma.01G029300	Glyma.01G029300	mixed_up_down	Glyma.06G282900	82	Glyma.06G282900	Glyma.06G282900	up	0.994536	3.80171e-11	1
	Glyma.01G029300	79	Glyma.01G029300	Glyma.01G029300	mixed_up_down	Glyma.06G306900	80	Glyma.06G306900	Glyma.06G306900	mixed_up_down	0.998702	2.88658e-14	1
	Glyma.01G029300	79	Glyma.01G029300	Glyma.01G029300	mixed_up_down	Glyma.08G009900	82	Glyma.08G009900	Glyma.08G009900	mixed_up_down	0.995356	1.68812e-11	1
	Glyma.01G029300	79	Glyma.01G029300	Glyma.01G029300	mixed_up_down	Glyma.08G155400	82	Glyma.08G155400	Glyma.08G155400	mixed_up_down	0.994536	3.80171e-11	1
	Glyma.01G029300	79	Glyma.01G029300	Glyma.01G029300	mixed_up_down	Glyma.08G155500	82	Glyma.08G155500	Glyma.08G155500	mixed_up_down	0.994536	3.80171e-11	1
	Glyma.01G029300	79	Glyma.01G029300	Glyma.01G029300	mixed_up_down	Glyma.08G155700	85	Glyma.08G155700	Glyma.08G155700	mixed_up_down	0.99786	3.52163e-13	1
	Glyma.01G029300	79	Glyma.01G029300	Glyma.01G029300	mixed_up_down	Glyma.08G232200	84	Glyma.08G232200	Glyma.08G232200	mixed_up_down	0.99628	5.57865e-12	1
	Glyma.01G029300	79	Glyma.01G029300	Glyma.01G029300	mixed_up_down	Glyma.08G328600	80	Glyma.08G328600	Glyma.08G328600	mixed_up_down	0.998384	8.65974e-14	1
	Glyma.01G029300	79	Glyma.01G029300	Glyma.01G029300	mixed_up_down	Glyma.08G342300	82	Glyma.08G342300	Glyma.08G342300	mixed_up_down	0.994536	3.80171e-11	1
	Glyma.01G029300	79	Glyma.01G029300	Glyma.01G029300	mixed_up_down	Glyma.09G087400	71	Glyma.09G087400	Glyma.09G087400	up	0.993752	7.42038e-11	1
	Glyma.01G029300	79	Glyma.01G029300	Glyma.01G029300	mixed_up_down	Glyma.09G117900	74	Glyma.09G117900	Glyma.09G117900	down	0.990985	4.61838e-10	1
	Glyma.01G029300	79	Glyma.01G029300	Glyma.01G029300	mixed_up_down	Glyma.09G221800	82	Glyma.09G221800	Glyma.09G221800	mixed_up_down	0.994405	4.27836e-11	1
	Glyma.01G029300	79	Glyma.01G029300	Glyma.01G029300	mixed_up_down	Glyma.10G017000	82	Glyma.10G017000	Glyma.10G017000	mixed_up_down	0.994536	3.80171e-11	1
	Glyma.01G029300	79	Glyma.01G029300	Glyma.01G029300	mixed_up_down	Glyma.10G056000	37	Glyma.10G056000	Glyma.10G056000	mixed_up_down	0.994634	3.47073e-11	1
	Glyma.01G029300	79	Glyma.01G029300	Glyma.01G029300	mixed_up_down	Glyma.10G056300	77	Glyma.10G056300	Glyma.10G056300	mixed_up_down	0.997771	4.31877e-13	1
	Glyma.01G029300	79	Glyma.01G029300	Glyma.01G029300	mixed_up_down	Glyma.10G296600	84	Glyma.10G296600	Glyma.10G296600	mixed_up_down	0.9956	1.28866e-11	1
	Glyma.01G029300	79	Glyma.01G029300	Glyma.01G029300	mixed_up_down	Glyma.11G120600	82	Glyma.11G120600	Glyma.11G120600	mixed_up_down	0.99351	8.96936e-11	1
	Glyma.01G029300	79	Glyma.01G029300	Glyma.01G029300	mixed_up_down	Glyma.11G179100	82	Glyma.11G179100	Glyma.11G179100	mixed_up_down	0.993619	8.24114e-11	1
	Glyma.01G029300	79	Glyma.01G029300	Glyma.01G029300	mixed_up_down	Glyma.11G238000	81	Glyma.11G238000	Glyma.11G238000	mixed_up_down	0.999324	1.11022e-15	1
	Glyma.01G029300	79	Glyma.01G029300	Glyma.01G029300	mixed_up_down	Glyma.12G122300	83	Glyma.12G122300	Glyma.12G122300	up	0.997386	9.57012e-13	1
	Glyma.01G029300	79	Glyma.01G029300	Glyma.01G029300	mixed_up_down	Glyma.12G124100	82	Glyma.12G124100	Glyma.12G124100	mixed_up_down	0.994536	3.80171e-11	1
	Glyma.01G029300	79	Glyma.01G029300	Glyma.01G029300	mixed_up_down	Glyma.12G124200	82	Glyma.12G124200	Glyma.12G124200	mixed_up_down	0.994536	3.80171e-11	1
	Glyma.01G029300	79	Glyma.01G029300	Glyma.01G029300	mixed_up_down	Glyma.12G124900	82	Glyma.12G124900	Glyma.12G124900	mixed_up_down	0.994536	3.80171e-11	1
	Glyma.01G029300	79	Glyma.01G029300	Glyma.01G029300	mixed_up_down	Glyma.13G091400	82	Glyma.13G091400	Glyma.13G091400	mixed_up_down	0.994536	3.80171e-11	1
	Glyma.01G029300	79	Glyma.01G029300	Glyma.01G029300	mixed_up_down	Glyma.13G165000	85	Glyma.13G165000	Glyma.13G165000	mixed_up_down	0.996371	4.92451e-12	1
	Glyma.01G029300	79	Glyma.01G029300	Glyma.01G029300	mixed_up_down	Glyma.13G218300	81	Glyma.13G218300	Glyma.13G218300	mixed_up_down	0.99429	4.73488e-11	1
	Glyma.01G029300	79	Glyma.01G029300	Glyma.01G029300	mixed_up_down	Glyma.13G240500	83	Glyma.13G240500	Glyma.13G240500	down	0.99548	1.47464e-11	1
	Glyma.01G029300	79	Glyma.01G029300	Glyma.01G029300	mixed_up_down	Glyma.13G319700	84	Glyma.13G319700	Glyma.13G319700	mixed_up_down	0.996464	4.32854e-12	1
	Glyma.01G029300	79	Glyma.01G029300	Glyma.01G029300	mixed_up_down	Glyma.14G014200	78	Glyma.14G014200	Glyma.14G014200	mixed_up_down	0.998934	1.06581e-14	1
	Glyma.01G029300	79	Glyma.01G029300	Glyma.01G029300	mixed_up_down	Glyma.15G066200	82	Glyma.15G066200	Glyma.15G066200	mixed_up_down	0.994536	3.80171e-11	1
	Glyma.01G029300	79	Glyma.01G029300	Glyma.01G029300	mixed_up_down	Glyma.15G140200	76	Glyma.15G140200	Glyma.15G140200	mixed_up_down	0.999928	0	1
	Glyma.01G029300	79	Glyma.01G029300	Glyma.01G029300	mixed_up_down	Glyma.15G238600	84	Glyma.15G238600	Glyma.15G238600	up	0.998175	1.58984e-13	1
	Glyma.01G029300	79	Glyma.01G029300	Glyma.01G029300	mixed_up_down	Glyma.16G043500	78	Glyma.16G043500	Glyma.16G043500	mixed_up_down	0.994421	4.21714e-11	1
	Glyma.01G029300	79	Glyma.01G029300	Glyma.01G029300	mixed_up_down	Glyma.16G079500	82	Glyma.16G079500	Glyma.16G079500	mixed_up_down	0.998903	1.24345e-14	1
	Glyma.01G029300	79	Glyma.01G029300	Glyma.01G029300	mixed_up_down	Glyma.16G129600	76	Glyma.16G129600	Glyma.16G129600	mixed_up_down	0.994595	3.59859e-11	1
	Glyma.01G029300	79	Glyma.01G029300	Glyma.01G029300	mixed_up_down	Glyma.17G008500	66	Glyma.17G008500	Glyma.17G008500	down	0.990549	5.84634e-10	1
	Glyma.01G029300	79	Glyma.01G029300	Glyma.01G029300	mixed_up_down	Glyma.17G027300	82	Glyma.17G027300	Glyma.17G027300	mixed_up_down	0.994292	4.725e-11	1
	Glyma.01G029300	79	Glyma.01G029300	Glyma.01G029300	mixed_up_down	Glyma.17G106100	84	Glyma.17G106100	Glyma.17G106100	mixed_up_down	0.994143	5.37557e-11	1
	Glyma.01G029300	79	Glyma.01G029300	Glyma.01G029300	mixed_up_down	Glyma.17G139400	82	Glyma.17G139400	Glyma.17G139400	mixed_up_down	0.995042	2.34035e-11	1
	Glyma.01G029300	79	Glyma.01G029300	Glyma.01G029300	mixed_up_down	Glyma.17G157400	83	Glyma.17G157400	Glyma.17G157400	mixed_up_down	0.994055	5.79163e-11	1
	Glyma.01G029300	79	Glyma.01G029300	Glyma.01G029300	mixed_up_down	Glyma.18G019300	75	Glyma.18G019300	Glyma.18G019300	mixed_up_down	0.995617	1.26439e-11	1
	Glyma.01G029300	79	Glyma.01G029300	Glyma.01G029300	mixed_up_down	Glyma.18G054000	82	Glyma.18G054000	Glyma.18G054000	up	0.99451	3.89053e-11	1
	Glyma.01G029300	79	Glyma.01G029300	Glyma.01G029300	mixed_up_down	Glyma.18G215100	85	Glyma.18G215100	Glyma.18G215100	mixed_up_down	0.99664	3.35176e-12	1
	Glyma.01G029300	79	Glyma.01G029300	Glyma.01G029300	mixed_up_down	Glyma.18G225000	82	Glyma.18G225000	Glyma.18G225000	mixed_up_down	0.994497	3.93867e-11	1
	Glyma.01G029300	79	Glyma.01G029300	Glyma.01G029300	mixed_up_down	Glyma.19G019600	82	Glyma.19G019600	Glyma.19G019600	mixed_up_down	0.996891	2.27396e-12	1
	Glyma.01G029300	79	Glyma.01G029300	Glyma.01G029300	mixed_up_down	Glyma.19G161100	84	Glyma.19G161100	Glyma.19G161100	down	0.995463	1.50213e-11	1
	Glyma.01G029300	79	Glyma.01G029300	Glyma.01G029300	mixed_up_down	Glyma.20G034100	81	Glyma.20G034100	Glyma.20G034100	mixed_up_down	0.993327	1.0305e-10	1
	Glyma.01G029300	79	Glyma.01G029300	Glyma.01G029300	mixed_up_down	Glyma.20G246300	83	Glyma.20G246300	Glyma.20G246300	mixed_up_down	0.997297	1.13198e-12	1
	Glyma.01G029300	79	Glyma.01G029300	Glyma.01G029300	mixed_up_down	Glyma.20G247400	84	Glyma.20G247400	Glyma.20G247400	mixed_up_down	0.994871	2.77272e-11	1
	Glyma.01G029300	79	Glyma.01G029300	Glyma.01G029300	mixed_up_down	XLOC_001320	76	XLOC_001320	XLOC_001320	down	0.990263	6.78097e-10	1
	Glyma.01G029300	79	Glyma.01G029300	Glyma.01G029300	mixed_up_down	XLOC_029029	82	XLOC_029029	XLOC_029029	mixed_up_down	0.994536	3.80171e-11	1
	Glyma.01G029300	79	Glyma.01G029300	Glyma.01G029300	mixed_up_down	XLOC_040788	37	XLOC_040788	XLOC_040788	mixed_up_down	0.991244	3.99311e-10	1
9	Glyma.01G030000	48	Glyma.01G030000	Glyma.01G030000	up	Glyma.01G062900	33	Glyma.01G062900	Glyma.01G062900	mixed_up_down	0.995071	2.27343e-11	1
	Glyma.01G030000	48	Glyma.01G030000	Glyma.01G030000	up	Glyma.02G035400	29	Glyma.02G035400	Glyma.02G035400	mixed_up_down	0.994186	5.17895e-11	1
	Glyma.01G030000	48	Glyma.01G030000	Glyma.01G030000	up	Glyma.02G063600	25	Glyma.02G063600	Glyma.02G063600	mixed_up_down	0.991482	3.48206e-10	1
	Glyma.01G030000	48	Glyma.01G030000	Glyma.01G030000	up	Glyma.02G241400	38	Glyma.02G241400	Glyma.02G241400	up	0.994304	4.6751e-11	1
	Glyma.01G030000	48	Glyma.01G030000	Glyma.01G030000	up	Glyma.04G003200	48	Glyma.04G003200	Glyma.04G003200	mixed_up_down	0.996329	5.21827e-12	1
	Glyma.01G030000	48	Glyma.01G030000	Glyma.01G030000	up	Glyma.04G047600	7	Glyma.04G047600	Glyma.04G047600	up	0.992894	1.41002e-10	1
	Glyma.01G030000	48	Glyma.01G030000	Glyma.01G030000	up	Glyma.04G167800	34	Glyma.04G167800	Glyma.04G167800	mixed_up_down	0.995762	1.06917e-11	1
	Glyma.01G030000	48	Glyma.01G030000	Glyma.01G030000	up	Glyma.04G172500	36	Glyma.04G172500	Glyma.04G172500	mixed_up_down	0.994124	5.46156e-11	1
	Glyma.01G030000	48	Glyma.01G030000	Glyma.01G030000	up	Glyma.04G192500	46	Glyma.04G192500	Glyma.04G192500	mixed_up_down	0.997281	1.16485e-12	1
	Glyma.01G030000	48	Glyma.01G030000	Glyma.01G030000	up	Glyma.04G198500	35	Glyma.04G198500	Glyma.04G198500	mixed_up_down	0.994086	5.64031e-11	1
	Glyma.01G030000	48	Glyma.01G030000	Glyma.01G030000	up	Glyma.05G037800	13	Glyma.05G037800	Glyma.05G037800	mixed_up_down	0.99254	1.7971e-10	1
	Glyma.01G030000	48	Glyma.01G030000	Glyma.01G030000	up	Glyma.05G213700	42	Glyma.05G213700	Glyma.05G213700	mixed_up_down	0.997691	5.15366e-13	1
	Glyma.01G030000	48	Glyma.01G030000	Glyma.01G030000	up	Glyma.05G241900	41	Glyma.05G241900	Glyma.05G241900	up	0.995016	2.40232e-11	1
	Glyma.01G030000	48	Glyma.01G030000	Glyma.01G030000	up	Glyma.06G160400	38	Glyma.06G160400	Glyma.06G160400	mixed_up_down	0.99606	7.42495e-12	1
	Glyma.01G030000	48	Glyma.01G030000	Glyma.01G030000	up	Glyma.06G173300	25	Glyma.06G173300	Glyma.06G173300	up	0.992387	1.98813e-10	1
	Glyma.01G030000	48	Glyma.01G030000	Glyma.01G030000	up	Glyma.06G182200	16	Glyma.06G182200	Glyma.06G182200	mixed_up_down	0.994169	5.25637e-11	1
	Glyma.01G030000	48	Glyma.01G030000	Glyma.01G030000	up	Glyma.06G313500	33	Glyma.06G313500	Glyma.06G313500	mixed_up_down	0.991871	2.75823e-10	1
	Glyma.01G030000	48	Glyma.01G030000	Glyma.01G030000	up	Glyma.07G102500	16	Glyma.07G102500	Glyma.07G102500	mixed_up_down	0.994665	3.37415e-11	1
	Glyma.01G030000	48	Glyma.01G030000	Glyma.01G030000	up	Glyma.07G135100	20	Glyma.07G135100	Glyma.07G135100	mixed_up_down	0.992522	1.81839e-10	1
	Glyma.01G030000	48	Glyma.01G030000	Glyma.01G030000	up	Glyma.07G141600	12	Glyma.07G141600	Glyma.07G141600	mixed_up_down	0.9943	4.69391e-11	1
	Glyma.01G030000	48	Glyma.01G030000	Glyma.01G030000	up	Glyma.08G092200	15	Glyma.08G092200	Glyma.08G092200	up	0.991995	2.55404e-10	1
	Glyma.01G030000	48	Glyma.01G030000	Glyma.01G030000	up	Glyma.08G120300	37	Glyma.08G120300	Glyma.08G120300	mixed_up_down	0.99452	3.85707e-11	1
	Glyma.01G030000	48	Glyma.01G030000	Glyma.01G030000	up	Glyma.08G163400	41	Glyma.08G163400	Glyma.08G163400	mixed_up_down	0.995154	2.08824e-11	1
	Glyma.01G030000	48	Glyma.01G030000	Glyma.01G030000	up	Glyma.08G201400	27	Glyma.08G201400	Glyma.08G201400	mixed_up_down	0.990995	4.5923e-10	1
	Glyma.01G030000	48	Glyma.01G030000	Glyma.01G030000	up	Glyma.08G212800	33	Glyma.08G212800	Glyma.08G212800	down	0.992845	1.45947e-10	1
	Glyma.01G030000	48	Glyma.01G030000	Glyma.01G030000	up	Glyma.08G224800	39	Glyma.08G224800	Glyma.08G224800	mixed_up_down	0.991402	3.64779e-10	1
	Glyma.01G030000	48	Glyma.01G030000	Glyma.01G030000	up	Glyma.08G253200	39	Glyma.08G253200	Glyma.08G253200	down	0.993834	6.94533e-11	1
	Glyma.01G030000	48	Glyma.01G030000	Glyma.01G030000	up	Glyma.09G063000	22	Glyma.09G063000	Glyma.09G063000	up	0.995669	1.19167e-11	1
	Glyma.01G030000	48	Glyma.01G030000	Glyma.01G030000	up	Glyma.10G164100	35	Glyma.10G164100	Glyma.10G164100	mixed_up_down	0.993517	8.92166e-11	1
	Glyma.01G030000	48	Glyma.01G030000	Glyma.01G030000	up	Glyma.10G172200	32	Glyma.10G172200	Glyma.10G172200	mixed_up_down	0.992009	2.53196e-10	1
	Glyma.01G030000	48	Glyma.01G030000	Glyma.01G030000	up	Glyma.10G248800	37	Glyma.10G248800	Glyma.10G248800	mixed_up_down	0.993853	6.83889e-11	1
	Glyma.01G030000	48	Glyma.01G030000	Glyma.01G030000	up	Glyma.11G106000	13	Glyma.11G106000	Glyma.11G106000	down	0.991114	4.2999e-10	1
	Glyma.01G030000	48	Glyma.01G030000	Glyma.01G030000	up	Glyma.11G244300	32	Glyma.11G244300	Glyma.11G244300	mixed_up_down	0.996836	2.48379e-12	1
	Glyma.01G030000	48	Glyma.01G030000	Glyma.01G030000	up	Glyma.13G091600	19	Glyma.13G091600	Glyma.13G091600	mixed_up_down	0.994812	2.93545e-11	1
	Glyma.01G030000	48	Glyma.01G030000	Glyma.01G030000	up	Glyma.13G177600	38	Glyma.13G177600	Glyma.13G177600	mixed_up_down	0.994702	3.25768e-11	1
	Glyma.01G030000	48	Glyma.01G030000	Glyma.01G030000	up	Glyma.13G204300	34	Glyma.13G204300	Glyma.13G204300	mixed_up_down	0.995172	2.04952e-11	1
	Glyma.01G030000	48	Glyma.01G030000	Glyma.01G030000	up	Glyma.14G189500	33	Glyma.14G189500	Glyma.14G189500	mixed_up_down	0.991465	3.51576e-10	1
	Glyma.01G030000	48	Glyma.01G030000	Glyma.01G030000	up	Glyma.15G011000	30	Glyma.15G011000	Glyma.15G011000	mixed_up_down	0.995094	2.21891e-11	1
	Glyma.01G030000	48	Glyma.01G030000	Glyma.01G030000	up	Glyma.17G107800	5	Glyma.17G107800	Glyma.17G107800	down	0.990013	7.6943e-10	1
	Glyma.01G030000	48	Glyma.01G030000	Glyma.01G030000	up	Glyma.18G003700	11	Glyma.18G003700	Glyma.18G003700	mixed_up_down	0.992362	2.02166e-10	1
	Glyma.01G030000	48	Glyma.01G030000	Glyma.01G030000	up	Glyma.18G109600	36	Glyma.18G109600	Glyma.18G109600	mixed_up_down	0.994558	3.72589e-11	1
	Glyma.01G030000	48	Glyma.01G030000	Glyma.01G030000	up	Glyma.18G244600	27	Glyma.18G244600	Glyma.18G244600	mixed_up_down	0.993416	9.63962e-11	1
	Glyma.01G030000	48	Glyma.01G030000	Glyma.01G030000	up	Glyma.18G259400	14	Glyma.18G259400	Glyma.18G259400	down	0.991535	3.37482e-10	1
	Glyma.01G030000	48	Glyma.01G030000	Glyma.01G030000	up	Glyma.20G089900	11	Glyma.20G089900	Glyma.20G089900	mixed_up_down	0.992024	2.50854e-10	1
	Glyma.01G030000	48	Glyma.01G030000	Glyma.01G030000	up	Glyma.20G131100	36	Glyma.20G131100	Glyma.20G131100	mixed_up_down	0.994844	2.84492e-11	1
	Glyma.01G030000	48	Glyma.01G030000	Glyma.01G030000	up	XLOC_022764	35	XLOC_022764	XLOC_022764	mixed_up_down	0.993368	9.98952e-11	1
10	Glyma.01G033900	6	Glyma.01G033900	Glyma.01G033900	mixed_up_down	Glyma.04G216900	9	Glyma.04G216900	Glyma.04G216900	mixed_up_down	0.990152	7.17703e-10	1
	Glyma.01G033900	6	Glyma.01G033900	Glyma.01G033900	mixed_up_down	Glyma.08G328500	13	Glyma.08G328500	Glyma.08G328500	mixed_up_down	0.993922	6.46696e-11	1
	Glyma.01G033900	6	Glyma.01G033900	Glyma.01G033900	mixed_up_down	Glyma.12G092000	9	Glyma.12G092000	Glyma.12G092000	mixed_up_down	0.993158	1.16702e-10	1
	Glyma.01G033900	6	Glyma.01G033900	Glyma.01G033900	mixed_up_down	Glyma.15G275700	10	Glyma.15G275700	Glyma.15G275700	mixed_up_down	0.997019	1.84497e-12	1
	Glyma.01G033900	6	Glyma.01G033900	Glyma.01G033900	mixed_up_down	Glyma.17G113400	9	Glyma.17G113400	Glyma.17G113400	mixed_up_down	0.992722	1.58921e-10	1
	Glyma.01G033900	6	Glyma.01G033900	Glyma.01G033900	mixed_up_down	Glyma.20G212900	10	Glyma.20G212900	Glyma.20G212900	mixed_up_down	0.992673	1.64287e-10	1
11	Glyma.01G034000	5	Glyma.01G034000	Glyma.01G034000	down	Glyma.06G101900	7	Glyma.06G101900	Glyma.06G101900	mixed_up_down	0.992432	1.93084e-10	1
	Glyma.01G034000	5	Glyma.01G034000	Glyma.01G034000	down	Glyma.09G203700	4	Glyma.09G203700	Glyma.09G203700	down	0.995717	1.12643e-11	1
	Glyma.01G034000	5	Glyma.01G034000	Glyma.01G034000	down	Glyma.11G169900	6	Glyma.11G169900	Glyma.11G169900	down	0.995335	1.72655e-11	1
	Glyma.01G034000	5	Glyma.01G034000	Glyma.01G034000	down	Glyma.15G127500	16	Glyma.15G127500	Glyma.15G127500	down	0.992866	1.43837e-10	1
	Glyma.01G034000	5	Glyma.01G034000	Glyma.01G034000	down	XLOC_047651	4	XLOC_047651	XLOC_047651	down	0.993377	9.92699e-11	1
12	Glyma.01G040300	5	Glyma.01G040300	Glyma.01G040300	mixed_up_down	Glyma.02G283500	9	Glyma.02G283500	Glyma.02G283500	mixed_up_down	0.995526	1.4019e-11	1
	Glyma.01G040300	5	Glyma.01G040300	Glyma.01G040300	mixed_up_down	Glyma.07G028200	13	Glyma.07G028200	Glyma.07G028200	mixed_up_down	0.990441	6.1846e-10	1
	Glyma.01G040300	5	Glyma.01G040300	Glyma.01G040300	mixed_up_down	Glyma.13G308200	16	Glyma.13G308200	Glyma.13G308200	mixed_up_down	0.990801	5.10807e-10	1
	Glyma.01G040300	5	Glyma.01G040300	Glyma.01G040300	mixed_up_down	Glyma.20G187400	7	Glyma.20G187400	Glyma.20G187400	mixed_up_down	0.992805	1.50084e-10	1
	Glyma.01G040300	5	Glyma.01G040300	Glyma.01G040300	mixed_up_down	XLOC_042521	6	XLOC_042521	XLOC_042521	mixed_up_down	0.994266	4.83684e-11	1
13	Glyma.01G044000	16	Glyma.01G044000	Glyma.01G044000	mixed_up_down	Glyma.01G074800	17	Glyma.01G074800	Glyma.01G074800	mixed_up_down	0.992468	1.88453e-10	1
	Glyma.01G044000	16	Glyma.01G044000	Glyma.01G044000	mixed_up_down	Glyma.02G074000	12	Glyma.02G074000	Glyma.02G074000	mixed_up_down	0.993718	7.6255e-11	1
	Glyma.01G044000	16	Glyma.01G044000	Glyma.01G044000	mixed_up_down	Glyma.05G200500	18	Glyma.05G200500	Glyma.05G200500	mixed_up_down	0.994553	3.74194e-11	1
	Glyma.01G044000	16	Glyma.01G044000	Glyma.01G044000	mixed_up_down	Glyma.05G243200	6	Glyma.05G243200	Glyma.05G243200	mixed_up_down	0.990757	5.23196e-10	1
	Glyma.01G044000	16	Glyma.01G044000	Glyma.01G044000	mixed_up_down	Glyma.06G176100	4	Glyma.06G176100	Glyma.06G176100	mixed_up_down	0.992723	1.58774e-10	1
	Glyma.01G044000	16	Glyma.01G044000	Glyma.01G044000	mixed_up_down	Glyma.06G194900	13	Glyma.06G194900	Glyma.06G194900	mixed_up_down	0.992429	1.93384e-10	1
	Glyma.01G044000	16	Glyma.01G044000	Glyma.01G044000	mixed_up_down	Glyma.08G135000	16	Glyma.08G135000	Glyma.08G135000	mixed_up_down	0.991694	3.07114e-10	1
	Glyma.01G044000	16	Glyma.01G044000	Glyma.01G044000	mixed_up_down	Glyma.08G150400	12	Glyma.08G150400	Glyma.08G150400	mixed_up_down	0.993898	6.59433e-11	1
	Glyma.01G044000	16	Glyma.01G044000	Glyma.01G044000	mixed_up_down	Glyma.08G336100	14	Glyma.08G336100	Glyma.08G336100	mixed_up_down	0.99348	9.17626e-11	1
	Glyma.01G044000	16	Glyma.01G044000	Glyma.01G044000	mixed_up_down	Glyma.10G010800	13	Glyma.10G010800	Glyma.10G010800	mixed_up_down	0.994126	5.45493e-11	1
	Glyma.01G044000	16	Glyma.01G044000	Glyma.01G044000	mixed_up_down	Glyma.10G072700	14	Glyma.10G072700	Glyma.10G072700	mixed_up_down	0.995837	9.78329e-12	1
	Glyma.01G044000	16	Glyma.01G044000	Glyma.01G044000	mixed_up_down	Glyma.10G285200	15	Glyma.10G285200	Glyma.10G285200	mixed_up_down	0.991983	2.5727e-10	1
	Glyma.01G044000	16	Glyma.01G044000	Glyma.01G044000	mixed_up_down	Glyma.14G094800	10	Glyma.14G094800	Glyma.14G094800	mixed_up_down	0.994053	5.80096e-11	1
	Glyma.01G044000	16	Glyma.01G044000	Glyma.01G044000	mixed_up_down	Glyma.16G205500	5	Glyma.16G205500	Glyma.16G205500	mixed_up_down	0.99363	8.17462e-11	1
	Glyma.01G044000	16	Glyma.01G044000	Glyma.01G044000	mixed_up_down	Glyma.18G028400	4	Glyma.18G028400	Glyma.18G028400	mixed_up_down	0.993177	1.15144e-10	1
	Glyma.01G044000	16	Glyma.01G044000	Glyma.01G044000	mixed_up_down	Glyma.20G172300	9	Glyma.20G172300	Glyma.20G172300	mixed_up_down	0.997682	5.24469e-13	1
15	Glyma.01G048800	1	Glyma.01G048800	Glyma.01G048800	up	Glyma.17G068700	5	Glyma.17G068700	Glyma.17G068700	mixed_up_down	0.99336	1.00551e-10	1
16	Glyma.01G050900	5	Glyma.01G050900	Glyma.01G050900	mixed_up_down	Glyma.08G068600	5	Glyma.08G068600	Glyma.08G068600	mixed_up_down	0.991372	3.71224e-10	1
	Glyma.01G050900	5	Glyma.01G050900	Glyma.01G050900	mixed_up_down	Glyma.10G003200	4	Glyma.10G003200	Glyma.10G003200	mixed_up_down	0.995018	2.39597e-11	1
	Glyma.01G050900	5	Glyma.01G050900	Glyma.01G050900	mixed_up_down	Glyma.16G005300	10	Glyma.16G005300	Glyma.16G005300	mixed_up_down	0.995882	9.26681e-12	1
	Glyma.01G050900	5	Glyma.01G050900	Glyma.01G050900	mixed_up_down	Glyma.19G130400	4	Glyma.19G130400	Glyma.19G130400	mixed_up_down	0.99508	2.25089e-11	1
	Glyma.01G050900	5	Glyma.01G050900	Glyma.01G050900	mixed_up_down	Glyma.20G005800	7	Glyma.20G005800	Glyma.20G005800	mixed_up_down	0.995658	1.20624e-11	1
17	Glyma.01G053100	2	Glyma.01G053100	Glyma.01G053100	up	Glyma.15G056500	8	Glyma.15G056500	Glyma.15G056500	down	0.992348	2.04033e-10	1
	Glyma.01G053100	2	Glyma.01G053100	Glyma.01G053100	up	Glyma.15G194300	14	Glyma.15G194300	Glyma.15G194300	down	0.990317	6.59738e-10	1
18	Glyma.01G058600	12	Glyma.01G058600	Glyma.01G058600	mixed_up_down	Glyma.01G133500	7	Glyma.01G133500	Glyma.01G133500	down	0.993543	8.74443e-11	1
	Glyma.01G058600	12	Glyma.01G058600	Glyma.01G058600	mixed_up_down	Glyma.03G221100	7	Glyma.03G221100	Glyma.03G221100	mixed_up_down	0.994014	5.99223e-11	1
	Glyma.01G058600	12	Glyma.01G058600	Glyma.01G058600	mixed_up_down	Glyma.08G282600	4	Glyma.08G282600	Glyma.08G282600	mixed_up_down	0.990106	7.34539e-10	1
	Glyma.01G058600	12	Glyma.01G058600	Glyma.01G058600	mixed_up_down	Glyma.09G041800	13	Glyma.09G041800	Glyma.09G041800	mixed_up_down	0.992917	1.38724e-10	1
	Glyma.01G058600	12	Glyma.01G058600	Glyma.01G058600	mixed_up_down	Glyma.10G214600	10	Glyma.10G214600	Glyma.10G214600	mixed_up_down	0.992757	1.55118e-10	1
	Glyma.01G058600	12	Glyma.01G058600	Glyma.01G058600	mixed_up_down	Glyma.12G100500	5	Glyma.12G100500	Glyma.12G100500	mixed_up_down	0.991611	3.22638e-10	1
	Glyma.01G058600	12	Glyma.01G058600	Glyma.01G058600	mixed_up_down	Glyma.19G193300	12	Glyma.19G193300	Glyma.19G193300	mixed_up_down	0.994825	2.89875e-11	1
	Glyma.01G058600	12	Glyma.01G058600	Glyma.01G058600	mixed_up_down	Glyma.20G023100	11	Glyma.20G023100	Glyma.20G023100	mixed_up_down	0.99025	6.82741e-10	1
	Glyma.01G058600	12	Glyma.01G058600	Glyma.01G058600	mixed_up_down	Glyma.20G171400	12	Glyma.20G171400	Glyma.20G171400	mixed_up_down	0.996958	2.03992e-12	1
	Glyma.01G058600	12	Glyma.01G058600	Glyma.01G058600	mixed_up_down	Glyma.U016600	13	Glyma.U016600	Glyma.U016600	mixed_up_down	0.996324	5.25713e-12	1
	Glyma.01G058600	12	Glyma.01G058600	Glyma.01G058600	mixed_up_down	Glyma.U032600	12	Glyma.U032600	Glyma.U032600	down	0.99309	1.22652e-10	1
	Glyma.01G058600	12	Glyma.01G058600	Glyma.01G058600	mixed_up_down	XLOC_019823	15	XLOC_019823	XLOC_019823	mixed_up_down	0.992106	2.38238e-10	1
19	Glyma.01G062100	3	Glyma.01G062100	Glyma.01G062100	mixed_up_down	Glyma.18G279900	5	Glyma.18G279900	Glyma.18G279900	mixed_up_down	0.990663	5.50283e-10	1
	Glyma.01G062100	3	Glyma.01G062100	Glyma.01G062100	mixed_up_down	Glyma.19G001100	4	Glyma.19G001100	Glyma.19G001100	mixed_up_down	0.99149	3.46561e-10	1
	Glyma.01G062100	3	Glyma.01G062100	Glyma.01G062100	mixed_up_down	Glyma.20G144700	3	Glyma.20G144700	Glyma.20G144700	mixed_up_down	0.992066	2.4427e-10	1
20	Glyma.01G062900	33	Glyma.01G062900	Glyma.01G062900	mixed_up_down	Glyma.02G063600	25	Glyma.02G063600	Glyma.02G063600	mixed_up_down	0.993207	1.12645e-10	1
	Glyma.01G062900	33	Glyma.01G062900	Glyma.01G062900	mixed_up_down	Glyma.02G241400	38	Glyma.02G241400	Glyma.02G241400	up	0.996199	6.20659e-12	1
	Glyma.01G062900	33	Glyma.01G062900	Glyma.01G062900	mixed_up_down	Glyma.04G003200	48	Glyma.04G003200	Glyma.04G003200	mixed_up_down	0.992428	1.93611e-10	1
	Glyma.01G062900	33	Glyma.01G062900	Glyma.01G062900	mixed_up_down	Glyma.04G167800	34	Glyma.04G167800	Glyma.04G167800	mixed_up_down	0.998139	1.75415e-13	1
	Glyma.01G062900	33	Glyma.01G062900	Glyma.01G062900	mixed_up_down	Glyma.04G172500	36	Glyma.04G172500	Glyma.04G172500	mixed_up_down	0.999264	1.77636e-15	1
	Glyma.01G062900	33	Glyma.01G062900	Glyma.01G062900	mixed_up_down	Glyma.04G192500	46	Glyma.04G192500	Glyma.04G192500	mixed_up_down	0.995661	1.20282e-11	1
	Glyma.01G062900	33	Glyma.01G062900	Glyma.01G062900	mixed_up_down	Glyma.04G198500	35	Glyma.04G198500	Glyma.04G198500	mixed_up_down	0.999122	3.9968e-15	1
	Glyma.01G062900	33	Glyma.01G062900	Glyma.01G062900	mixed_up_down	Glyma.05G213700	42	Glyma.05G213700	Glyma.05G213700	mixed_up_down	0.998248	1.29452e-13	1
	Glyma.01G062900	33	Glyma.01G062900	Glyma.01G062900	mixed_up_down	Glyma.05G241900	41	Glyma.05G241900	Glyma.05G241900	up	0.996727	2.94276e-12	1
	Glyma.01G062900	33	Glyma.01G062900	Glyma.01G062900	mixed_up_down	Glyma.06G160400	38	Glyma.06G160400	Glyma.06G160400	mixed_up_down	0.999678	0	1
	Glyma.01G062900	33	Glyma.01G062900	Glyma.01G062900	mixed_up_down	Glyma.06G173300	25	Glyma.06G173300	Glyma.06G173300	up	0.994523	3.84555e-11	1
	Glyma.01G062900	33	Glyma.01G062900	Glyma.01G062900	mixed_up_down	Glyma.06G313500	33	Glyma.06G313500	Glyma.06G313500	mixed_up_down	0.997184	1.38822e-12	1
	Glyma.01G062900	33	Glyma.01G062900	Glyma.01G062900	mixed_up_down	Glyma.08G120300	37	Glyma.08G120300	Glyma.08G120300	mixed_up_down	0.999187	2.66454e-15	1
	Glyma.01G062900	33	Glyma.01G062900	Glyma.01G062900	mixed_up_down	Glyma.08G163400	41	Glyma.08G163400	Glyma.08G163400	mixed_up_down	0.9982	1.48326e-13	1
	Glyma.01G062900	33	Glyma.01G062900	Glyma.01G062900	mixed_up_down	Glyma.08G212800	33	Glyma.08G212800	Glyma.08G212800	down	0.998725	2.64233e-14	1
	Glyma.01G062900	33	Glyma.01G062900	Glyma.01G062900	mixed_up_down	Glyma.08G224800	39	Glyma.08G224800	Glyma.08G224800	mixed_up_down	0.991845	2.80153e-10	1
	Glyma.01G062900	33	Glyma.01G062900	Glyma.01G062900	mixed_up_down	Glyma.08G253200	39	Glyma.08G253200	Glyma.08G253200	down	0.995524	1.40428e-11	1
	Glyma.01G062900	33	Glyma.01G062900	Glyma.01G062900	mixed_up_down	Glyma.09G063000	22	Glyma.09G063000	Glyma.09G063000	up	0.991468	3.51046e-10	1
	Glyma.01G062900	33	Glyma.01G062900	Glyma.01G062900	mixed_up_down	Glyma.10G043400	26	Glyma.10G043400	Glyma.10G043400	up	0.995555	1.35689e-11	1
	Glyma.01G062900	33	Glyma.01G062900	Glyma.01G062900	mixed_up_down	Glyma.10G164100	35	Glyma.10G164100	Glyma.10G164100	mixed_up_down	0.999141	3.55271e-15	1
	Glyma.01G062900	33	Glyma.01G062900	Glyma.01G062900	mixed_up_down	Glyma.10G172200	32	Glyma.10G172200	Glyma.10G172200	mixed_up_down	0.998528	5.44009e-14	1
	Glyma.01G062900	33	Glyma.01G062900	Glyma.01G062900	mixed_up_down	Glyma.10G248800	37	Glyma.10G248800	Glyma.10G248800	mixed_up_down	0.994707	3.24167e-11	1
	Glyma.01G062900	33	Glyma.01G062900	Glyma.01G062900	mixed_up_down	Glyma.11G244300	32	Glyma.11G244300	Glyma.11G244300	mixed_up_down	0.999079	5.32907e-15	1
	Glyma.01G062900	33	Glyma.01G062900	Glyma.01G062900	mixed_up_down	Glyma.13G177600	38	Glyma.13G177600	Glyma.13G177600	mixed_up_down	0.997638	5.76872e-13	1
	Glyma.01G062900	33	Glyma.01G062900	Glyma.01G062900	mixed_up_down	Glyma.13G204300	34	Glyma.13G204300	Glyma.13G204300	mixed_up_down	0.993042	1.2698e-10	1
	Glyma.01G062900	33	Glyma.01G062900	Glyma.01G062900	mixed_up_down	Glyma.14G189500	33	Glyma.14G189500	Glyma.14G189500	mixed_up_down	0.998196	1.50102e-13	1
	Glyma.01G062900	33	Glyma.01G062900	Glyma.01G062900	mixed_up_down	Glyma.15G011000	30	Glyma.15G011000	Glyma.15G011000	mixed_up_down	0.996241	5.87641e-12	1
	Glyma.01G062900	33	Glyma.01G062900	Glyma.01G062900	mixed_up_down	Glyma.20G131100	36	Glyma.20G131100	Glyma.20G131100	mixed_up_down	0.999873	0	1
	Glyma.01G062900	33	Glyma.01G062900	Glyma.01G062900	mixed_up_down	XLOC_022764	35	XLOC_022764	XLOC_022764	mixed_up_down	0.998203	1.46994e-13	1
	Glyma.01G062900	33	Glyma.01G062900	Glyma.01G062900	mixed_up_down	XLOC_036392	26	XLOC_036392	XLOC_036392	mixed_up_down	0.990534	5.8911e-10	1
21	Glyma.01G063800	5	Glyma.01G063800	Glyma.01G063800	mixed_up_down	Glyma.02G035400	29	Glyma.02G035400	Glyma.02G035400	mixed_up_down	0.990213	6.95597e-10	1
	Glyma.01G063800	5	Glyma.01G063800	Glyma.01G063800	mixed_up_down	Glyma.09G080700	22	Glyma.09G080700	Glyma.09G080700	mixed_up_down	0.990064	7.5007e-10	1
	Glyma.01G063800	5	Glyma.01G063800	Glyma.01G063800	mixed_up_down	Glyma.11G106000	13	Glyma.11G106000	Glyma.11G106000	down	0.994212	5.06817e-11	1
	Glyma.01G063800	5	Glyma.01G063800	Glyma.01G063800	mixed_up_down	Glyma.18G003700	11	Glyma.18G003700	Glyma.18G003700	mixed_up_down	0.990844	4.99179e-10	1
	Glyma.01G063800	5	Glyma.01G063800	Glyma.01G063800	mixed_up_down	Glyma.18G244600	27	Glyma.18G244600	Glyma.18G244600	mixed_up_down	0.993413	9.65719e-11	1
22	Glyma.01G069500	7	Glyma.01G069500	Glyma.01G069500	mixed_up_down	Glyma.02G075200	1	Glyma.02G075200	Glyma.02G075200	mixed_up_down	0.990206	6.98129e-10	1
	Glyma.01G069500	7	Glyma.01G069500	Glyma.01G069500	mixed_up_down	Glyma.05G002600	4	Glyma.05G002600	Glyma.05G002600	mixed_up_down	0.993656	8.00655e-11	1
	Glyma.01G069500	7	Glyma.01G069500	Glyma.01G069500	mixed_up_down	Glyma.07G076800	8	Glyma.07G076800	Glyma.07G076800	mixed_up_down	0.995887	9.20686e-12	1
	Glyma.01G069500	7	Glyma.01G069500	Glyma.01G069500	mixed_up_down	Glyma.12G194400	4	Glyma.12G194400	Glyma.12G194400	mixed_up_down	0.9969	2.24265e-12	1
	Glyma.01G069500	7	Glyma.01G069500	Glyma.01G069500	mixed_up_down	Glyma.15G003800	8	Glyma.15G003800	Glyma.15G003800	down	0.990952	4.70266e-10	1
	Glyma.01G069500	7	Glyma.01G069500	Glyma.01G069500	mixed_up_down	Glyma.18G299200	10	Glyma.18G299200	Glyma.18G299200	mixed_up_down	0.99422	5.03144e-11	1
	Glyma.01G069500	7	Glyma.01G069500	Glyma.01G069500	mixed_up_down	Glyma.20G002400	4	Glyma.20G002400	Glyma.20G002400	mixed_up_down	0.99312	1.19996e-10	1
23	Glyma.01G074800	17	Glyma.01G074800	Glyma.01G074800	mixed_up_down	Glyma.02G164400	10	Glyma.02G164400	Glyma.02G164400	mixed_up_down	0.991645	3.16119e-10	1
	Glyma.01G074800	17	Glyma.01G074800	Glyma.01G074800	mixed_up_down	Glyma.04G196500	11	Glyma.04G196500	Glyma.04G196500	mixed_up_down	0.990268	6.76438e-10	1
	Glyma.01G074800	17	Glyma.01G074800	Glyma.01G074800	mixed_up_down	Glyma.06G194900	13	Glyma.06G194900	Glyma.06G194900	mixed_up_down	0.993115	1.20442e-10	1
	Glyma.01G074800	17	Glyma.01G074800	Glyma.01G074800	mixed_up_down	Glyma.08G328400	10	Glyma.08G328400	Glyma.08G328400	mixed_up_down	0.992802	1.50387e-10	1
	Glyma.01G074800	17	Glyma.01G074800	Glyma.01G074800	mixed_up_down	Glyma.09G062800	6	Glyma.09G062800	Glyma.09G062800	mixed_up_down	0.99053	5.90395e-10	1
	Glyma.01G074800	17	Glyma.01G074800	Glyma.01G074800	mixed_up_down	Glyma.09G154700	12	Glyma.09G154700	Glyma.09G154700	mixed_up_down	0.991457	3.53336e-10	1
	Glyma.01G074800	17	Glyma.01G074800	Glyma.01G074800	mixed_up_down	Glyma.10G072700	14	Glyma.10G072700	Glyma.10G072700	mixed_up_down	0.994239	4.95011e-11	1
	Glyma.01G074800	17	Glyma.01G074800	Glyma.01G074800	mixed_up_down	Glyma.11G110600	2	Glyma.11G110600	Glyma.11G110600	up	0.992	2.54679e-10	1
	Glyma.01G074800	17	Glyma.01G074800	Glyma.01G074800	mixed_up_down	Glyma.13G001200	10	Glyma.13G001200	Glyma.13G001200	mixed_up_down	0.995728	1.1128e-11	1
	Glyma.01G074800	17	Glyma.01G074800	Glyma.01G074800	mixed_up_down	Glyma.13G299200	10	Glyma.13G299200	Glyma.13G299200	mixed_up_down	0.991951	2.62485e-10	1
	Glyma.01G074800	17	Glyma.01G074800	Glyma.01G074800	mixed_up_down	Glyma.14G094800	10	Glyma.14G094800	Glyma.14G094800	mixed_up_down	0.998317	1.06137e-13	1
	Glyma.01G074800	17	Glyma.01G074800	Glyma.01G074800	mixed_up_down	Glyma.15G253700	6	Glyma.15G253700	Glyma.15G253700	mixed_up_down	0.990743	5.27075e-10	1
	Glyma.01G074800	17	Glyma.01G074800	Glyma.01G074800	mixed_up_down	Glyma.15G275600	12	Glyma.15G275600	Glyma.15G275600	mixed_up_down	0.996181	6.35869e-12	1
	Glyma.01G074800	17	Glyma.01G074800	Glyma.01G074800	mixed_up_down	Glyma.17G133200	10	Glyma.17G133200	Glyma.17G133200	mixed_up_down	0.994921	2.63949e-11	1
	Glyma.01G074800	17	Glyma.01G074800	Glyma.01G074800	mixed_up_down	Glyma.18G265700	10	Glyma.18G265700	Glyma.18G265700	mixed_up_down	0.992106	2.38173e-10	1
	Glyma.01G074800	17	Glyma.01G074800	Glyma.01G074800	mixed_up_down	Glyma.20G172300	9	Glyma.20G172300	Glyma.20G172300	mixed_up_down	0.993928	6.43197e-11	1
24	Glyma.01G076900	12	Glyma.01G076900	Glyma.01G076900	mixed_up_down	Glyma.01G123500	11	Glyma.01G123500	Glyma.01G123500	mixed_up_down	0.990076	7.45694e-10	1
	Glyma.01G076900	12	Glyma.01G076900	Glyma.01G076900	mixed_up_down	Glyma.02G282100	14	Glyma.02G282100	Glyma.02G282100	mixed_up_down	0.996248	5.82134e-12	1
	Glyma.01G076900	12	Glyma.01G076900	Glyma.01G076900	mixed_up_down	Glyma.05G203000	14	Glyma.05G203000	Glyma.05G203000	mixed_up_down	0.995321	1.75315e-11	1
	Glyma.01G076900	12	Glyma.01G076900	Glyma.01G076900	mixed_up_down	Glyma.07G074400	15	Glyma.07G074400	Glyma.07G074400	mixed_up_down	0.991304	3.85902e-10	1
	Glyma.01G076900	12	Glyma.01G076900	Glyma.01G076900	mixed_up_down	Glyma.08G050500	12	Glyma.08G050500	Glyma.08G050500	mixed_up_down	0.998666	3.30846e-14	1
	Glyma.01G076900	12	Glyma.01G076900	Glyma.01G076900	mixed_up_down	Glyma.09G039000	8	Glyma.09G039000	Glyma.09G039000	mixed_up_down	0.991611	3.22731e-10	1
	Glyma.01G076900	12	Glyma.01G076900	Glyma.01G076900	mixed_up_down	Glyma.12G136900	10	Glyma.12G136900	Glyma.12G136900	mixed_up_down	0.993072	1.24267e-10	1
	Glyma.01G076900	12	Glyma.01G076900	Glyma.01G076900	mixed_up_down	Glyma.13G278600	14	Glyma.13G278600	Glyma.13G278600	mixed_up_down	0.996876	2.33014e-12	1
	Glyma.01G076900	12	Glyma.01G076900	Glyma.01G076900	mixed_up_down	Glyma.16G209400	9	Glyma.16G209400	Glyma.16G209400	down	0.993656	8.00959e-11	1
	Glyma.01G076900	12	Glyma.01G076900	Glyma.01G076900	mixed_up_down	Glyma.19G099500	13	Glyma.19G099500	Glyma.19G099500	mixed_up_down	0.993276	1.07068e-10	1
	Glyma.01G076900	12	Glyma.01G076900	Glyma.01G076900	mixed_up_down	Glyma.19G261300	12	Glyma.19G261300	Glyma.19G261300	mixed_up_down	0.996331	5.20073e-12	1
	Glyma.01G076900	12	Glyma.01G076900	Glyma.01G076900	mixed_up_down	XLOC_016679	12	XLOC_016679	XLOC_016679	mixed_up_down	0.995643	1.22773e-11	1
25	Glyma.01G078700	1	Glyma.01G078700	Glyma.01G078700	mixed_up_down	XLOC_023131	1	XLOC_023131	XLOC_023131	mixed_up_down	0.992311	2.08876e-10	1
26	Glyma.01G081700	11	Glyma.01G081700	Glyma.01G081700	mixed_up_down	Glyma.07G079100	14	Glyma.07G079100	Glyma.07G079100	down	0.995561	1.34701e-11	1
	Glyma.01G081700	11	Glyma.01G081700	Glyma.01G081700	mixed_up_down	Glyma.08G061000	12	Glyma.08G061000	Glyma.08G061000	mixed_up_down	0.995839	9.75797e-12	1
	Glyma.01G081700	11	Glyma.01G081700	Glyma.01G081700	mixed_up_down	Glyma.08G269900	18	Glyma.08G269900	Glyma.08G269900	down	0.997578	6.53477e-13	1
	Glyma.01G081700	11	Glyma.01G081700	Glyma.01G081700	mixed_up_down	Glyma.09G090100	16	Glyma.09G090100	Glyma.09G090100	mixed_up_down	0.995099	2.2093e-11	1
	Glyma.01G081700	11	Glyma.01G081700	Glyma.01G081700	mixed_up_down	Glyma.09G160400	16	Glyma.09G160400	Glyma.09G160400	mixed_up_down	0.992495	1.85154e-10	1
	Glyma.01G081700	11	Glyma.01G081700	Glyma.01G081700	mixed_up_down	Glyma.11G182100	19	Glyma.11G182100	Glyma.11G182100	mixed_up_down	0.99681	2.58682e-12	1
	Glyma.01G081700	11	Glyma.01G081700	Glyma.01G081700	mixed_up_down	Glyma.12G047600	19	Glyma.12G047600	Glyma.12G047600	mixed_up_down	0.994127	5.4476e-11	1
	Glyma.01G081700	11	Glyma.01G081700	Glyma.01G081700	mixed_up_down	Glyma.14G157500	16	Glyma.14G157500	Glyma.14G157500	mixed_up_down	0.99808	2.05169e-13	1
	Glyma.01G081700	11	Glyma.01G081700	Glyma.01G081700	mixed_up_down	Glyma.18G094600	20	Glyma.18G094600	Glyma.18G094600	mixed_up_down	0.996078	7.26375e-12	1
	Glyma.01G081700	11	Glyma.01G081700	Glyma.01G081700	mixed_up_down	Glyma.19G093400	10	Glyma.19G093400	Glyma.19G093400	mixed_up_down	0.995369	1.66396e-11	1
	Glyma.01G081700	11	Glyma.01G081700	Glyma.01G081700	mixed_up_down	Glyma.20G090500	14	Glyma.20G090500	Glyma.20G090500	mixed_up_down	0.995971	8.30092e-12	1
27	Glyma.01G089300	23	Glyma.01G089300	Glyma.01G089300	mixed_up_down	Glyma.03G157400	26	Glyma.03G157400	Glyma.03G157400	mixed_up_down	0.996523	3.97904e-12	1
	Glyma.01G089300	23	Glyma.01G089300	Glyma.01G089300	mixed_up_down	Glyma.04G015400	22	Glyma.04G015400	Glyma.04G015400	mixed_up_down	0.998843	1.64313e-14	1
	Glyma.01G089300	23	Glyma.01G089300	Glyma.01G089300	mixed_up_down	Glyma.04G015900	19	Glyma.04G015900	Glyma.04G015900	mixed_up_down	0.995274	1.84115e-11	1
	Glyma.01G089300	23	Glyma.01G089300	Glyma.01G089300	mixed_up_down	Glyma.04G056000	20	Glyma.04G056000	Glyma.04G056000	up	0.996459	4.35896e-12	1
	Glyma.01G089300	23	Glyma.01G089300	Glyma.01G089300	mixed_up_down	Glyma.04G167400	15	Glyma.04G167400	Glyma.04G167400	mixed_up_down	0.990269	6.76058e-10	1
	Glyma.01G089300	23	Glyma.01G089300	Glyma.01G089300	mixed_up_down	Glyma.04G240000	20	Glyma.04G240000	Glyma.04G240000	mixed_up_down	0.996243	5.85465e-12	1
	Glyma.01G089300	23	Glyma.01G089300	Glyma.01G089300	mixed_up_down	Glyma.06G014500	11	Glyma.06G014500	Glyma.06G014500	mixed_up_down	0.993904	6.56226e-11	1
	Glyma.01G089300	23	Glyma.01G089300	Glyma.01G089300	mixed_up_down	Glyma.06G015900	16	Glyma.06G015900	Glyma.06G015900	down	0.992415	1.95214e-10	1
	Glyma.01G089300	23	Glyma.01G089300	Glyma.01G089300	mixed_up_down	Glyma.06G130900	13	Glyma.06G130900	Glyma.06G130900	mixed_up_down	0.990044	7.57592e-10	1
	Glyma.01G089300	23	Glyma.01G089300	Glyma.01G089300	mixed_up_down	Glyma.06G131300	13	Glyma.06G131300	Glyma.06G131300	mixed_up_down	0.994547	3.76092e-11	1
	Glyma.01G089300	23	Glyma.01G089300	Glyma.01G089300	mixed_up_down	Glyma.06G309000	9	Glyma.06G309000	Glyma.06G309000	mixed_up_down	0.990103	7.35496e-10	1
	Glyma.01G089300	23	Glyma.01G089300	Glyma.01G089300	mixed_up_down	Glyma.07G163600	13	Glyma.07G163600	Glyma.07G163600	mixed_up_down	0.991605	3.2383e-10	1
	Glyma.01G089300	23	Glyma.01G089300	Glyma.01G089300	mixed_up_down	Glyma.07G201300	20	Glyma.07G201300	Glyma.07G201300	mixed_up_down	0.997788	4.1589e-13	1
	Glyma.01G089300	23	Glyma.01G089300	Glyma.01G089300	mixed_up_down	Glyma.08G204800	16	Glyma.08G204800	Glyma.08G204800	mixed_up_down	0.994995	2.45324e-11	1
	Glyma.01G089300	23	Glyma.01G089300	Glyma.01G089300	mixed_up_down	Glyma.10G144300	16	Glyma.10G144300	Glyma.10G144300	mixed_up_down	0.993155	1.17006e-10	1
	Glyma.01G089300	23	Glyma.01G089300	Glyma.01G089300	mixed_up_down	Glyma.11G102300	24	Glyma.11G102300	Glyma.11G102300	mixed_up_down	0.997932	2.97096e-13	1
	Glyma.01G089300	23	Glyma.01G089300	Glyma.01G089300	mixed_up_down	Glyma.12G049500	23	Glyma.12G049500	Glyma.12G049500	mixed_up_down	0.99625	5.80447e-12	1
	Glyma.01G089300	23	Glyma.01G089300	Glyma.01G089300	mixed_up_down	Glyma.13G356100	17	Glyma.13G356100	Glyma.13G356100	mixed_up_down	0.99521	1.97025e-11	1
	Glyma.01G089300	23	Glyma.01G089300	Glyma.01G089300	mixed_up_down	Glyma.14G177200	21	Glyma.14G177200	Glyma.14G177200	mixed_up_down	0.993614	8.27209e-11	1
	Glyma.01G089300	23	Glyma.01G089300	Glyma.01G089300	mixed_up_down	Glyma.15G250800	16	Glyma.15G250800	Glyma.15G250800	mixed_up_down	0.994372	4.4035e-11	1
	Glyma.01G089300	23	Glyma.01G089300	Glyma.01G089300	mixed_up_down	Glyma.19G244500	19	Glyma.19G244500	Glyma.19G244500	mixed_up_down	0.992809	1.49616e-10	1
	Glyma.01G089300	23	Glyma.01G089300	Glyma.01G089300	mixed_up_down	Glyma.20G155600	25	Glyma.20G155600	Glyma.20G155600	mixed_up_down	0.997978	2.65343e-13	1
	Glyma.01G089300	23	Glyma.01G089300	Glyma.01G089300	mixed_up_down	Glyma.20G214000	20	Glyma.20G214000	Glyma.20G214000	mixed_up_down	0.993553	8.67466e-11	1
28	Glyma.01G106700	10	Glyma.01G106700	Glyma.01G106700	mixed_up_down	Glyma.04G033500	12	Glyma.04G033500	Glyma.04G033500	mixed_up_down	0.997363	9.99201e-13	1
	Glyma.01G106700	10	Glyma.01G106700	Glyma.01G106700	mixed_up_down	Glyma.05G147200	12	Glyma.05G147200	Glyma.05G147200	mixed_up_down	0.992241	2.1859e-10	1
	Glyma.01G106700	10	Glyma.01G106700	Glyma.01G106700	mixed_up_down	Glyma.05G152500	17	Glyma.05G152500	Glyma.05G152500	mixed_up_down	0.992358	2.02616e-10	1
	Glyma.01G106700	10	Glyma.01G106700	Glyma.01G106700	mixed_up_down	Glyma.07G205400	10	Glyma.07G205400	Glyma.07G205400	mixed_up_down	0.9953	1.79265e-11	1
	Glyma.01G106700	10	Glyma.01G106700	Glyma.01G106700	mixed_up_down	Glyma.12G133700	15	Glyma.12G133700	Glyma.12G133700	mixed_up_down	0.990876	4.90302e-10	1
	Glyma.01G106700	10	Glyma.01G106700	Glyma.01G106700	mixed_up_down	Glyma.13G052100	12	Glyma.13G052100	Glyma.13G052100	mixed_up_down	0.998242	1.31894e-13	1
	Glyma.01G106700	10	Glyma.01G106700	Glyma.01G106700	mixed_up_down	Glyma.15G176900	16	Glyma.15G176900	Glyma.15G176900	mixed_up_down	0.994166	5.27014e-11	1
	Glyma.01G106700	10	Glyma.01G106700	Glyma.01G106700	mixed_up_down	Glyma.15G240600	9	Glyma.15G240600	Glyma.15G240600	mixed_up_down	0.991941	2.64059e-10	1
	Glyma.01G106700	10	Glyma.01G106700	Glyma.01G106700	mixed_up_down	Glyma.18G193600	8	Glyma.18G193600	Glyma.18G193600	mixed_up_down	0.997443	8.56426e-13	1
	Glyma.01G106700	10	Glyma.01G106700	Glyma.01G106700	mixed_up_down	XLOC_014230	11	XLOC_014230	XLOC_014230	mixed_up_down	0.997301	1.12221e-12	1
29	Glyma.01G106800	1	Glyma.01G106800	Glyma.01G106800	up	Glyma.11G236700	1	Glyma.11G236700	Glyma.11G236700	mixed_up_down	0.990264	6.77886e-10	1
30	Glyma.01G113200	16	Glyma.01G113200	Glyma.01G113200	mixed_up_down	Glyma.02G249000	22	Glyma.02G249000	Glyma.02G249000	mixed_up_down	0.990372	6.413e-10	1
	Glyma.01G113200	16	Glyma.01G113200	Glyma.01G113200	mixed_up_down	Glyma.02G253900	8	Glyma.02G253900	Glyma.02G253900	mixed_up_down	0.991194	4.10834e-10	1
	Glyma.01G113200	16	Glyma.01G113200	Glyma.01G113200	mixed_up_down	Glyma.06G272800	20	Glyma.06G272800	Glyma.06G272800	mixed_up_down	0.995994	8.07443e-12	1
	Glyma.01G113200	16	Glyma.01G113200	Glyma.01G113200	mixed_up_down	Glyma.09G164100	17	Glyma.09G164100	Glyma.09G164100	mixed_up_down	0.990579	5.75417e-10	1
	Glyma.01G113200	16	Glyma.01G113200	Glyma.01G113200	mixed_up_down	Glyma.12G114900	8	Glyma.12G114900	Glyma.12G114900	mixed_up_down	0.990186	7.0513e-10	1
	Glyma.01G113200	16	Glyma.01G113200	Glyma.01G113200	mixed_up_down	Glyma.13G226900	17	Glyma.13G226900	Glyma.13G226900	mixed_up_down	0.99538	1.64397e-11	1
	Glyma.01G113200	16	Glyma.01G113200	Glyma.01G113200	mixed_up_down	Glyma.14G050900	18	Glyma.14G050900	Glyma.14G050900	mixed_up_down	0.994361	4.44786e-11	1
	Glyma.01G113200	16	Glyma.01G113200	Glyma.01G113200	mixed_up_down	Glyma.19G097100	19	Glyma.19G097100	Glyma.19G097100	mixed_up_down	0.993886	6.66103e-11	1
	Glyma.01G113200	16	Glyma.01G113200	Glyma.01G113200	mixed_up_down	Glyma.20G142300	19	Glyma.20G142300	Glyma.20G142300	up	0.994831	2.88178e-11	1
	Glyma.01G113200	16	Glyma.01G113200	Glyma.01G113200	mixed_up_down	XLOC_009171	17	XLOC_009171	XLOC_009171	mixed_up_down	0.997975	2.67342e-13	1
	Glyma.01G113200	16	Glyma.01G113200	Glyma.01G113200	mixed_up_down	XLOC_009184	20	XLOC_009184	XLOC_009184	mixed_up_down	0.992506	1.83837e-10	1
	Glyma.01G113200	16	Glyma.01G113200	Glyma.01G113200	mixed_up_down	XLOC_019806	22	XLOC_019806	XLOC_019806	down	0.992744	1.56444e-10	1
	Glyma.01G113200	16	Glyma.01G113200	Glyma.01G113200	mixed_up_down	XLOC_032287	20	XLOC_032287	XLOC_032287	down	0.992994	1.31402e-10	1
	Glyma.01G113200	16	Glyma.01G113200	Glyma.01G113200	mixed_up_down	XLOC_032498	18	XLOC_032498	XLOC_032498	mixed_up_down	0.995128	2.14491e-11	1
	Glyma.01G113200	16	Glyma.01G113200	Glyma.01G113200	mixed_up_down	XLOC_036385	18	XLOC_036385	XLOC_036385	mixed_up_down	0.996224	6.00409e-12	1
	Glyma.01G113200	16	Glyma.01G113200	Glyma.01G113200	mixed_up_down	XLOC_038494	17	XLOC_038494	XLOC_038494	down	0.998018	2.39808e-13	1
31	Glyma.01G114300	5	Glyma.01G114300	Glyma.01G114300	mixed_up_down	Glyma.08G096000	3	Glyma.08G096000	Glyma.08G096000	mixed_up_down	0.991414	3.62141e-10	1
	Glyma.01G114300	5	Glyma.01G114300	Glyma.01G114300	mixed_up_down	Glyma.08G236000	3	Glyma.08G236000	Glyma.08G236000	down	0.997613	6.07514e-13	1
	Glyma.01G114300	5	Glyma.01G114300	Glyma.01G114300	mixed_up_down	Glyma.11G214100	2	Glyma.11G214100	Glyma.11G214100	down	0.990305	6.63786e-10	1
	Glyma.01G114300	5	Glyma.01G114300	Glyma.01G114300	mixed_up_down	Glyma.15G010600	9	Glyma.15G010600	Glyma.15G010600	mixed_up_down	0.996924	2.15605e-12	1
	Glyma.01G114300	5	Glyma.01G114300	Glyma.01G114300	mixed_up_down	Glyma.15G019500	4	Glyma.15G019500	Glyma.15G019500	down	0.990631	5.5968e-10	1
32	Glyma.01G118000	6	Glyma.01G118000	Glyma.01G118000	mixed_up_down	Glyma.10G273000	6	Glyma.10G273000	Glyma.10G273000	mixed_up_down	0.996447	4.43223e-12	1
	Glyma.01G118000	6	Glyma.01G118000	Glyma.01G118000	mixed_up_down	Glyma.16G023400	6	Glyma.16G023400	Glyma.16G023400	mixed_up_down	0.992931	1.3733e-10	1
	Glyma.01G118000	6	Glyma.01G118000	Glyma.01G118000	mixed_up_down	Glyma.16G201800	8	Glyma.16G201800	Glyma.16G201800	mixed_up_down	0.996722	2.96363e-12	1
	Glyma.01G118000	6	Glyma.01G118000	Glyma.01G118000	mixed_up_down	Glyma.16G204600	5	Glyma.16G204600	Glyma.16G204600	mixed_up_down	0.994528	3.82769e-11	1
	Glyma.01G118000	6	Glyma.01G118000	Glyma.01G118000	mixed_up_down	Glyma.17G236300	5	Glyma.17G236300	Glyma.17G236300	up	0.993051	1.26174e-10	1
	Glyma.01G118000	6	Glyma.01G118000	Glyma.01G118000	mixed_up_down	XLOC_011413	7	XLOC_011413	XLOC_011413	mixed_up_down	0.992014	2.52462e-10	1
33	Glyma.01G122000	6	Glyma.01G122000	Glyma.01G122000	mixed_up_down	Glyma.07G047600	11	Glyma.07G047600	Glyma.07G047600	mixed_up_down	0.992602	1.72425e-10	1
	Glyma.01G122000	6	Glyma.01G122000	Glyma.01G122000	mixed_up_down	Glyma.08G052800	16	Glyma.08G052800	Glyma.08G052800	mixed_up_down	0.990774	5.18336e-10	1
	Glyma.01G122000	6	Glyma.01G122000	Glyma.01G122000	mixed_up_down	Glyma.08G213900	8	Glyma.08G213900	Glyma.08G213900	mixed_up_down	0.997226	1.28741e-12	1
	Glyma.01G122000	6	Glyma.01G122000	Glyma.01G122000	mixed_up_down	Glyma.11G030700	14	Glyma.11G030700	Glyma.11G030700	mixed_up_down	0.992362	2.02159e-10	1
	Glyma.01G122000	6	Glyma.01G122000	Glyma.01G122000	mixed_up_down	Glyma.11G068800	1	Glyma.11G068800	Glyma.11G068800	mixed_up_down	0.991686	3.08552e-10	1
	Glyma.01G122000	6	Glyma.01G122000	Glyma.01G122000	mixed_up_down	Glyma.19G130400	4	Glyma.19G130400	Glyma.19G130400	mixed_up_down	0.993038	1.27339e-10	1
34	Glyma.01G123100	1	Glyma.01G123100	Glyma.01G123100	mixed_up_down	Glyma.20G118100	1	Glyma.20G118100	Glyma.20G118100	mixed_up_down	0.990676	5.46472e-10	1
35	Glyma.01G123500	11	Glyma.01G123500	Glyma.01G123500	mixed_up_down	Glyma.05G203000	14	Glyma.05G203000	Glyma.05G203000	mixed_up_down	0.994703	3.25622e-11	1
	Glyma.01G123500	11	Glyma.01G123500	Glyma.01G123500	mixed_up_down	Glyma.07G074400	15	Glyma.07G074400	Glyma.07G074400	mixed_up_down	0.996665	3.23075e-12	1
	Glyma.01G123500	11	Glyma.01G123500	Glyma.01G123500	mixed_up_down	Glyma.09G035700	11	Glyma.09G035700	Glyma.09G035700	mixed_up_down	0.993129	1.19258e-10	1
	Glyma.01G123500	11	Glyma.01G123500	Glyma.01G123500	mixed_up_down	Glyma.10G225400	12	Glyma.10G225400	Glyma.10G225400	mixed_up_down	0.998269	1.22125e-13	1
	Glyma.01G123500	11	Glyma.01G123500	Glyma.01G123500	mixed_up_down	Glyma.13G278600	14	Glyma.13G278600	Glyma.13G278600	mixed_up_down	0.996927	2.14584e-12	1
	Glyma.01G123500	11	Glyma.01G123500	Glyma.01G123500	mixed_up_down	Glyma.13G308200	16	Glyma.13G308200	Glyma.13G308200	mixed_up_down	0.994911	2.66471e-11	1
	Glyma.01G123500	11	Glyma.01G123500	Glyma.01G123500	mixed_up_down	Glyma.13G332200	9	Glyma.13G332200	Glyma.13G332200	down	0.99492	2.64107e-11	1
	Glyma.01G123500	11	Glyma.01G123500	Glyma.01G123500	mixed_up_down	Glyma.17G015900	8	Glyma.17G015900	Glyma.17G015900	mixed_up_down	0.991091	4.35544e-10	1
	Glyma.01G123500	11	Glyma.01G123500	Glyma.01G123500	mixed_up_down	Glyma.19G261300	12	Glyma.19G261300	Glyma.19G261300	mixed_up_down	0.993101	1.21645e-10	1
	Glyma.01G123500	11	Glyma.01G123500	Glyma.01G123500	mixed_up_down	XLOC_017898	11	XLOC_017898	XLOC_017898	mixed_up_down	0.992931	1.3738e-10	1
36	Glyma.01G126600	2	Glyma.01G126600	Glyma.01G126600	mixed_up_down	Glyma.08G187700	1	Glyma.08G187700	Glyma.08G187700	mixed_up_down	0.990673	5.4713e-10	1
	Glyma.01G126600	2	Glyma.01G126600	Glyma.01G126600	mixed_up_down	Glyma.10G065500	1	Glyma.10G065500	Glyma.10G065500	mixed_up_down	0.990798	5.11562e-10	1
37	Glyma.01G127400	1	Glyma.01G127400	Glyma.01G127400	mixed_up_down	Glyma.07G032700	1	Glyma.07G032700	Glyma.07G032700	mixed_up_down	0.995952	8.50386e-12	1
38	Glyma.01G131200	1	Glyma.01G131200	Glyma.01G131200	mixed_up_down	Glyma.12G150500	2	Glyma.12G150500	Glyma.12G150500	down	0.99141	3.6311e-10	1
39	Glyma.01G132500	5	Glyma.01G132500	Glyma.01G132500	down	Glyma.02G249600	10	Glyma.02G249600	Glyma.02G249600	down	0.996134	6.76081e-12	1
	Glyma.01G132500	5	Glyma.01G132500	Glyma.01G132500	down	Glyma.10G130200	6	Glyma.10G130200	Glyma.10G130200	mixed_up_down	0.993565	8.59908e-11	1
	Glyma.01G132500	5	Glyma.01G132500	Glyma.01G132500	down	Glyma.10G168100	10	Glyma.10G168100	Glyma.10G168100	mixed_up_down	0.996273	5.62572e-12	1
	Glyma.01G132500	5	Glyma.01G132500	Glyma.01G132500	down	Glyma.11G111400	9	Glyma.11G111400	Glyma.11G111400	mixed_up_down	0.992033	2.49498e-10	1
	Glyma.01G132500	5	Glyma.01G132500	Glyma.01G132500	down	Glyma.20G150100	6	Glyma.20G150100	Glyma.20G150100	mixed_up_down	0.996543	3.86713e-12	1
	Glyma.01G133500	7	Glyma.01G133500	Glyma.01G133500	down	Glyma.03G027200	8	Glyma.03G027200	Glyma.03G027200	down	0.991976	2.58532e-10	1
	Glyma.01G133500	7	Glyma.01G133500	Glyma.01G133500	down	Glyma.03G221100	7	Glyma.03G221100	Glyma.03G221100	mixed_up_down	0.995105	2.19487e-11	1
	Glyma.01G133500	7	Glyma.01G133500	Glyma.01G133500	down	Glyma.09G041800	13	Glyma.09G041800	Glyma.09G041800	mixed_up_down	0.992379	1.99925e-10	1
	Glyma.01G133500	7	Glyma.01G133500	Glyma.01G133500	down	Glyma.10G204600	4	Glyma.10G204600	Glyma.10G204600	down	0.991692	3.07438e-10	1
	Glyma.01G133500	7	Glyma.01G133500	Glyma.01G133500	down	Glyma.19G019500	10	Glyma.19G019500	Glyma.19G019500	down	0.994077	5.68314e-11	1
	Glyma.01G133500	7	Glyma.01G133500	Glyma.01G133500	down	Glyma.19G193300	12	Glyma.19G193300	Glyma.19G193300	mixed_up_down	0.991967	2.59935e-10	1
40	Glyma.01G141100	1	Glyma.01G141100	Glyma.01G141100	up	Glyma.03G181100	1	Glyma.03G181100	Glyma.03G181100	mixed_up_down	0.99239	1.98408e-10	1
41	Glyma.01G160100	4	Glyma.01G160100	Glyma.01G160100	mixed_up_down	Glyma.02G305400	1	Glyma.02G305400	Glyma.02G305400	mixed_up_down	0.990125	7.27432e-10	1
	Glyma.01G160100	4	Glyma.01G160100	Glyma.01G160100	mixed_up_down	Glyma.10G274400	8	Glyma.10G274400	Glyma.10G274400	mixed_up_down	0.998065	2.12941e-13	1
	Glyma.01G160100	4	Glyma.01G160100	Glyma.01G160100	mixed_up_down	Glyma.13G357300	5	Glyma.13G357300	Glyma.13G357300	mixed_up_down	0.990711	5.36264e-10	1
	Glyma.01G160100	4	Glyma.01G160100	Glyma.01G160100	mixed_up_down	Glyma.18G013800	13	Glyma.18G013800	Glyma.18G013800	mixed_up_down	0.991783	2.90945e-10	1
42	Glyma.01G168400	16	Glyma.01G168400	Glyma.01G168400	up	Glyma.07G211100	22	Glyma.07G211100	Glyma.07G211100	mixed_up_down	0.992748	1.56055e-10	1
	Glyma.01G168400	16	Glyma.01G168400	Glyma.01G168400	up	Glyma.07G253700	10	Glyma.07G253700	Glyma.07G253700	mixed_up_down	0.990063	7.50308e-10	1
	Glyma.01G168400	16	Glyma.01G168400	Glyma.01G168400	up	Glyma.11G075000	14	Glyma.11G075000	Glyma.11G075000	up	0.9933	1.05146e-10	1
	Glyma.01G168400	16	Glyma.01G168400	Glyma.01G168400	up	Glyma.13G046200	20	Glyma.13G046200	Glyma.13G046200	mixed_up_down	0.990058	7.52377e-10	1
	Glyma.01G168400	16	Glyma.01G168400	Glyma.01G168400	up	Glyma.13G167000	9	Glyma.13G167000	Glyma.13G167000	mixed_up_down	0.991424	3.60098e-10	1
	Glyma.01G168400	16	Glyma.01G168400	Glyma.01G168400	up	Glyma.13G213200	22	Glyma.13G213200	Glyma.13G213200	mixed_up_down	0.990411	6.28209e-10	1
	Glyma.01G168400	16	Glyma.01G168400	Glyma.01G168400	up	Glyma.14G218200	19	Glyma.14G218200	Glyma.14G218200	mixed_up_down	0.992496	1.85017e-10	1
	Glyma.01G168400	16	Glyma.01G168400	Glyma.01G168400	up	Glyma.15G047000	17	Glyma.15G047000	Glyma.15G047000	up	0.993348	1.01434e-10	1
	Glyma.01G168400	16	Glyma.01G168400	Glyma.01G168400	up	Glyma.15G100200	21	Glyma.15G100200	Glyma.15G100200	mixed_up_down	0.99319	1.14039e-10	1
	Glyma.01G168400	16	Glyma.01G168400	Glyma.01G168400	up	Glyma.15G203100	15	Glyma.15G203100	Glyma.15G203100	mixed_up_down	0.994409	4.2613e-11	1
	Glyma.01G168400	16	Glyma.01G168400	Glyma.01G168400	up	Glyma.16G028500	14	Glyma.16G028500	Glyma.16G028500	mixed_up_down	0.993807	7.09943e-11	1
	Glyma.01G168400	16	Glyma.01G168400	Glyma.01G168400	up	Glyma.16G041700	17	Glyma.16G041700	Glyma.16G041700	mixed_up_down	0.995909	8.96061e-12	1
	Glyma.01G168400	16	Glyma.01G168400	Glyma.01G168400	up	Glyma.18G114900	16	Glyma.18G114900	Glyma.18G114900	mixed_up_down	0.99258	1.74947e-10	1
	Glyma.01G168400	16	Glyma.01G168400	Glyma.01G168400	up	Glyma.19G030200	21	Glyma.19G030200	Glyma.19G030200	mixed_up_down	0.990175	7.09203e-10	1
	Glyma.01G168400	16	Glyma.01G168400	Glyma.01G168400	up	Glyma.19G260600	16	Glyma.19G260600	Glyma.19G260600	mixed_up_down	0.99034	6.51708e-10	1
	Glyma.01G168400	16	Glyma.01G168400	Glyma.01G168400	up	Glyma.20G008600	19	Glyma.20G008600	Glyma.20G008600	mixed_up_down	0.991218	4.05352e-10	1
43	Glyma.01G169900	2	Glyma.01G169900	Glyma.01G169900	up	Glyma.16G145800	7	Glyma.16G145800	Glyma.16G145800	mixed_up_down	0.990803	5.10332e-10	1
	Glyma.01G169900	2	Glyma.01G169900	Glyma.01G169900	up	Glyma.16G199500	9	Glyma.16G199500	Glyma.16G199500	mixed_up_down	0.994108	5.53733e-11	1
44	Glyma.01G170200	3	Glyma.01G170200	Glyma.01G170200	mixed_up_down	Glyma.05G037800	13	Glyma.05G037800	Glyma.05G037800	mixed_up_down	0.990154	7.16739e-10	1
	Glyma.01G170200	3	Glyma.01G170200	Glyma.01G170200	mixed_up_down	Glyma.08G287400	7	Glyma.08G287400	Glyma.08G287400	mixed_up_down	0.991309	3.84945e-10	1
	Glyma.01G170200	3	Glyma.01G170200	Glyma.01G170200	mixed_up_down	Glyma.20G073000	7	Glyma.20G073000	Glyma.20G073000	mixed_up_down	0.991527	3.38996e-10	1
45	Glyma.01G175200	7	Glyma.01G175200	Glyma.01G175200	mixed_up_down	Glyma.01G225500	13	Glyma.01G225500	Glyma.01G225500	mixed_up_down	0.995562	1.3463e-11	1
	Glyma.01G175200	7	Glyma.01G175200	Glyma.01G175200	mixed_up_down	Glyma.06G177500	20	Glyma.06G177500	Glyma.06G177500	mixed_up_down	0.990824	5.0454e-10	1
	Glyma.01G175200	7	Glyma.01G175200	Glyma.01G175200	mixed_up_down	Glyma.09G152100	6	Glyma.09G152100	Glyma.09G152100	mixed_up_down	0.990792	5.13345e-10	1
	Glyma.01G175200	7	Glyma.01G175200	Glyma.01G175200	mixed_up_down	Glyma.10G274300	15	Glyma.10G274300	Glyma.10G274300	mixed_up_down	0.991138	4.24055e-10	1
	Glyma.01G175200	7	Glyma.01G175200	Glyma.01G175200	mixed_up_down	Glyma.14G184600	10	Glyma.14G184600	Glyma.14G184600	mixed_up_down	0.990819	5.05856e-10	1
	Glyma.01G175200	7	Glyma.01G175200	Glyma.01G175200	mixed_up_down	Glyma.17G132200	3	Glyma.17G132200	Glyma.17G132200	up	0.992573	1.75766e-10	1
	Glyma.01G175200	7	Glyma.01G175200	Glyma.01G175200	mixed_up_down	Glyma.20G243500	15	Glyma.20G243500	Glyma.20G243500	mixed_up_down	0.991834	2.82111e-10	1
46	Glyma.01G179400	15	Glyma.01G179400	Glyma.01G179400	down	Glyma.02G142400	22	Glyma.02G142400	Glyma.02G142400	mixed_up_down	0.996478	4.23994e-12	1
	Glyma.01G179400	15	Glyma.01G179400	Glyma.01G179400	down	Glyma.02G249000	22	Glyma.02G249000	Glyma.02G249000	mixed_up_down	0.996119	6.89093e-12	1
	Glyma.01G179400	15	Glyma.01G179400	Glyma.01G179400	down	Glyma.09G219800	4	Glyma.09G219800	Glyma.09G219800	mixed_up_down	0.992995	1.31299e-10	1
	Glyma.01G179400	15	Glyma.01G179400	Glyma.01G179400	down	Glyma.10G031900	15	Glyma.10G031900	Glyma.10G031900	down	0.990551	5.83805e-10	1
	Glyma.01G179400	15	Glyma.01G179400	Glyma.01G179400	down	Glyma.14G050900	18	Glyma.14G050900	Glyma.14G050900	mixed_up_down	0.990908	4.81923e-10	1
	Glyma.01G179400	15	Glyma.01G179400	Glyma.01G179400	down	Glyma.17G115300	19	Glyma.17G115300	Glyma.17G115300	mixed_up_down	0.991942	2.64007e-10	1
	Glyma.01G179400	15	Glyma.01G179400	Glyma.01G179400	down	Glyma.19G114100	17	Glyma.19G114100	Glyma.19G114100	mixed_up_down	0.992568	1.76319e-10	1
	Glyma.01G179400	15	Glyma.01G179400	Glyma.01G179400	down	Glyma.19G239100	17	Glyma.19G239100	Glyma.19G239100	mixed_up_down	0.992058	2.45594e-10	1
	Glyma.01G179400	15	Glyma.01G179400	Glyma.01G179400	down	Glyma.20G142300	19	Glyma.20G142300	Glyma.20G142300	up	0.990827	5.03704e-10	1
	Glyma.01G179400	15	Glyma.01G179400	Glyma.01G179400	down	XLOC_009174	19	XLOC_009174	XLOC_009174	mixed_up_down	0.99548	1.47504e-11	1
	Glyma.01G179400	15	Glyma.01G179400	Glyma.01G179400	down	XLOC_009184	20	XLOC_009184	XLOC_009184	mixed_up_down	0.991205	4.08367e-10	1
	Glyma.01G179400	15	Glyma.01G179400	Glyma.01G179400	down	XLOC_019806	22	XLOC_019806	XLOC_019806	down	0.993381	9.89315e-11	1
	Glyma.01G179400	15	Glyma.01G179400	Glyma.01G179400	down	XLOC_032287	20	XLOC_032287	XLOC_032287	down	0.992328	2.06688e-10	1
	Glyma.01G179400	15	Glyma.01G179400	Glyma.01G179400	down	XLOC_032498	18	XLOC_032498	XLOC_032498	mixed_up_down	0.992751	1.55685e-10	1
	Glyma.01G179400	15	Glyma.01G179400	Glyma.01G179400	down	XLOC_036385	18	XLOC_036385	XLOC_036385	mixed_up_down	0.99181	2.86319e-10	1
47	Glyma.01G182600	4	Glyma.01G182600	Glyma.01G182600	mixed_up_down	Glyma.06G015900	16	Glyma.06G015900	Glyma.06G015900	down	0.990569	5.78388e-10	1
	Glyma.01G182600	4	Glyma.01G182600	Glyma.01G182600	mixed_up_down	Glyma.06G109300	4	Glyma.06G109300	Glyma.06G109300	mixed_up_down	0.991826	2.8343e-10	1
	Glyma.01G182600	4	Glyma.01G182600	Glyma.01G182600	mixed_up_down	Glyma.10G026600	4	Glyma.10G026600	Glyma.10G026600	up	0.993034	1.27671e-10	1
	Glyma.01G182600	4	Glyma.01G182600	Glyma.01G182600	mixed_up_down	Glyma.18G247600	18	Glyma.18G247600	Glyma.18G247600	mixed_up_down	0.990001	7.73927e-10	1
48	Glyma.01G182700	10	Glyma.01G182700	Glyma.01G182700	mixed_up_down	Glyma.01G225500	13	Glyma.01G225500	Glyma.01G225500	mixed_up_down	0.993648	8.057e-11	1
	Glyma.01G182700	10	Glyma.01G182700	Glyma.01G182700	mixed_up_down	Glyma.04G008300	15	Glyma.04G008300	Glyma.04G008300	down	0.99374	7.49045e-11	1
	Glyma.01G182700	10	Glyma.01G182700	Glyma.01G182700	mixed_up_down	Glyma.06G177500	20	Glyma.06G177500	Glyma.06G177500	mixed_up_down	0.994901	2.69149e-11	1
	Glyma.01G182700	10	Glyma.01G182700	Glyma.01G182700	mixed_up_down	Glyma.06G177600	11	Glyma.06G177600	Glyma.06G177600	down	0.992727	1.58277e-10	1
	Glyma.01G182700	10	Glyma.01G182700	Glyma.01G182700	mixed_up_down	Glyma.08G339600	7	Glyma.08G339600	Glyma.08G339600	mixed_up_down	0.993627	8.19065e-11	1
	Glyma.01G182700	10	Glyma.01G182700	Glyma.01G182700	mixed_up_down	Glyma.09G147500	9	Glyma.09G147500	Glyma.09G147500	mixed_up_down	0.996922	2.16582e-12	1
	Glyma.01G182700	10	Glyma.01G182700	Glyma.01G182700	mixed_up_down	Glyma.10G063800	14	Glyma.10G063800	Glyma.10G063800	mixed_up_down	0.99166	3.13263e-10	1
	Glyma.01G182700	10	Glyma.01G182700	Glyma.01G182700	mixed_up_down	Glyma.13G167200	11	Glyma.13G167200	Glyma.13G167200	mixed_up_down	0.997841	3.67706e-13	1
	Glyma.01G182700	10	Glyma.01G182700	Glyma.01G182700	mixed_up_down	Glyma.14G184600	10	Glyma.14G184600	Glyma.14G184600	mixed_up_down	0.992792	1.51367e-10	1
	Glyma.01G182700	10	Glyma.01G182700	Glyma.01G182700	mixed_up_down	Glyma.17G247300	10	Glyma.17G247300	Glyma.17G247300	mixed_up_down	0.994429	4.18798e-11	1
49	Glyma.01G185400	4	Glyma.01G185400	Glyma.01G185400	mixed_up_down	Glyma.07G030500	3	Glyma.07G030500	Glyma.07G030500	mixed_up_down	0.993773	7.29907e-11	1
	Glyma.01G185400	4	Glyma.01G185400	Glyma.01G185400	mixed_up_down	Glyma.08G194700	3	Glyma.08G194700	Glyma.08G194700	mixed_up_down	0.996783	2.69962e-12	1
	Glyma.01G185400	4	Glyma.01G185400	Glyma.01G185400	mixed_up_down	Glyma.13G131200	5	Glyma.13G131200	Glyma.13G131200	mixed_up_down	0.995132	2.13602e-11	1
	Glyma.01G185400	4	Glyma.01G185400	Glyma.01G185400	mixed_up_down	Glyma.18G259300	3	Glyma.18G259300	Glyma.18G259300	mixed_up_down	0.994463	4.0612e-11	1
50	Glyma.01G186300	1	Glyma.01G186300	Glyma.01G186300	mixed_up_down	Glyma.17G096400	1	Glyma.17G096400	Glyma.17G096400	mixed_up_down	0.990202	6.99581e-10	1
51	Glyma.01G187700	1	Glyma.01G187700	Glyma.01G187700	mixed_up_down	Glyma.07G185500	1	Glyma.07G185500	Glyma.07G185500	mixed_up_down	0.991222	4.04522e-10	1
52	Glyma.01G191200	8	Glyma.01G191200	Glyma.01G191200	mixed_up_down	Glyma.03G261500	6	Glyma.03G261500	Glyma.03G261500	mixed_up_down	0.996943	2.09033e-12	1
	Glyma.01G191200	8	Glyma.01G191200	Glyma.01G191200	mixed_up_down	Glyma.06G055900	10	Glyma.06G055900	Glyma.06G055900	mixed_up_down	0.998014	2.42473e-13	1
	Glyma.01G191200	8	Glyma.01G191200	Glyma.01G191200	mixed_up_down	Glyma.06G105500	8	Glyma.06G105500	Glyma.06G105500	mixed_up_down	0.996332	5.19984e-12	1
	Glyma.01G191200	8	Glyma.01G191200	Glyma.01G191200	mixed_up_down	Glyma.06G261900	11	Glyma.06G261900	Glyma.06G261900	mixed_up_down	0.996391	4.79239e-12	1
	Glyma.01G191200	8	Glyma.01G191200	Glyma.01G191200	mixed_up_down	Glyma.10G000200	9	Glyma.10G000200	Glyma.10G000200	mixed_up_down	0.994118	5.4917e-11	1
	Glyma.01G191200	8	Glyma.01G191200	Glyma.01G191200	mixed_up_down	Glyma.15G052400	7	Glyma.15G052400	Glyma.15G052400	mixed_up_down	0.996689	3.1164e-12	1
	Glyma.01G191200	8	Glyma.01G191200	Glyma.01G191200	mixed_up_down	Glyma.18G036400	6	Glyma.18G036400	Glyma.18G036400	mixed_up_down	0.993419	9.61733e-11	1
	Glyma.01G191200	8	Glyma.01G191200	Glyma.01G191200	mixed_up_down	Glyma.19G248900	10	Glyma.19G248900	Glyma.19G248900	mixed_up_down	0.995768	1.06173e-11	1
	Glyma.01G199200	17	Glyma.01G199200	Glyma.01G199200	mixed_up_down	Glyma.05G172300	19	Glyma.05G172300	Glyma.05G172300	mixed_up_down	0.997132	1.52145e-12	1
	Glyma.01G199200	17	Glyma.01G199200	Glyma.01G199200	mixed_up_down	Glyma.05G191900	12	Glyma.05G191900	Glyma.05G191900	mixed_up_down	0.994965	2.52802e-11	1
	Glyma.01G199200	17	Glyma.01G199200	Glyma.01G199200	mixed_up_down	Glyma.06G183900	20	Glyma.06G183900	Glyma.06G183900	mixed_up_down	0.995811	1.00899e-11	1
	Glyma.01G199200	17	Glyma.01G199200	Glyma.01G199200	mixed_up_down	Glyma.07G132400	14	Glyma.07G132400	Glyma.07G132400	mixed_up_down	0.994948	2.57099e-11	1
	Glyma.01G199200	17	Glyma.01G199200	Glyma.01G199200	mixed_up_down	Glyma.08G239000	13	Glyma.08G239000	Glyma.08G239000	mixed_up_down	0.991807	2.86822e-10	1
	Glyma.01G199200	17	Glyma.01G199200	Glyma.01G199200	mixed_up_down	Glyma.09G238400	14	Glyma.09G238400	Glyma.09G238400	mixed_up_down	0.99497	2.51474e-11	1
	Glyma.01G199200	17	Glyma.01G199200	Glyma.01G199200	mixed_up_down	Glyma.11G022300	15	Glyma.11G022300	Glyma.11G022300	mixed_up_down	0.996342	5.12967e-12	1
	Glyma.01G199200	17	Glyma.01G199200	Glyma.01G199200	mixed_up_down	Glyma.12G171700	15	Glyma.12G171700	Glyma.12G171700	mixed_up_down	0.995051	2.31968e-11	1
	Glyma.01G199200	17	Glyma.01G199200	Glyma.01G199200	mixed_up_down	Glyma.12G227200	11	Glyma.12G227200	Glyma.12G227200	mixed_up_down	0.993512	8.9555e-11	1
	Glyma.01G199200	17	Glyma.01G199200	Glyma.01G199200	mixed_up_down	Glyma.14G132300	9	Glyma.14G132300	Glyma.14G132300	up	0.990979	4.63316e-10	1
	Glyma.01G199200	17	Glyma.01G199200	Glyma.01G199200	mixed_up_down	Glyma.15G169300	16	Glyma.15G169300	Glyma.15G169300	mixed_up_down	0.995911	8.94129e-12	1
	Glyma.01G199200	17	Glyma.01G199200	Glyma.01G199200	mixed_up_down	Glyma.17G190000	14	Glyma.17G190000	Glyma.17G190000	mixed_up_down	0.993465	9.28573e-11	1
	Glyma.01G199200	17	Glyma.01G199200	Glyma.01G199200	mixed_up_down	Glyma.18G046700	20	Glyma.18G046700	Glyma.18G046700	mixed_up_down	0.997636	5.79536e-13	1
	Glyma.01G199200	17	Glyma.01G199200	Glyma.01G199200	mixed_up_down	Glyma.19G063100	19	Glyma.19G063100	Glyma.19G063100	mixed_up_down	0.993273	1.07262e-10	1
	Glyma.01G199200	17	Glyma.01G199200	Glyma.01G199200	mixed_up_down	Glyma.19G079000	18	Glyma.19G079000	Glyma.19G079000	mixed_up_down	0.997825	3.81473e-13	1
	Glyma.01G199200	17	Glyma.01G199200	Glyma.01G199200	mixed_up_down	Glyma.20G137200	18	Glyma.20G137200	Glyma.20G137200	mixed_up_down	0.99744	8.61977e-13	1
	Glyma.01G199200	17	Glyma.01G199200	Glyma.01G199200	mixed_up_down	XLOC_023839	11	XLOC_023839	XLOC_023839	mixed_up_down	0.992528	1.8114e-10	1
53	Glyma.01G199700	5	Glyma.01G199700	Glyma.01G199700	mixed_up_down	Glyma.04G054100	6	Glyma.04G054100	Glyma.04G054100	mixed_up_down	0.990629	5.60209e-10	1
	Glyma.01G199700	5	Glyma.01G199700	Glyma.01G199700	mixed_up_down	Glyma.06G224200	4	Glyma.06G224200	Glyma.06G224200	mixed_up_down	0.990861	4.94348e-10	1
	Glyma.01G199700	5	Glyma.01G199700	Glyma.01G199700	mixed_up_down	Glyma.11G006500	9	Glyma.11G006500	Glyma.11G006500	mixed_up_down	0.994018	5.973e-11	1
	Glyma.01G199700	5	Glyma.01G199700	Glyma.01G199700	mixed_up_down	Glyma.11G100800	11	Glyma.11G100800	Glyma.11G100800	up	0.99168	3.09594e-10	1
	Glyma.01G199700	5	Glyma.01G199700	Glyma.01G199700	mixed_up_down	Glyma.15G197500	9	Glyma.15G197500	Glyma.15G197500	mixed_up_down	0.996562	3.76188e-12	1
54	Glyma.01G202700	3	Glyma.01G202700	Glyma.01G202700	mixed_up_down	Glyma.03G084500	5	Glyma.03G084500	Glyma.03G084500	mixed_up_down	0.992756	1.55184e-10	1
	Glyma.01G202700	3	Glyma.01G202700	Glyma.01G202700	mixed_up_down	Glyma.04G198600	8	Glyma.04G198600	Glyma.04G198600	mixed_up_down	0.993548	8.70788e-11	1
	Glyma.01G202700	3	Glyma.01G202700	Glyma.01G202700	mixed_up_down	Glyma.12G143000	8	Glyma.12G143000	Glyma.12G143000	mixed_up_down	0.99634	5.14166e-12	1
55	Glyma.01G206500	14	Glyma.01G206500	Glyma.01G206500	mixed_up_down	Glyma.03G014300	16	Glyma.03G014300	Glyma.03G014300	mixed_up_down	0.995179	2.03479e-11	1
	Glyma.01G206500	14	Glyma.01G206500	Glyma.01G206500	mixed_up_down	Glyma.05G148700	20	Glyma.05G148700	Glyma.05G148700	mixed_up_down	0.993287	1.06126e-10	1
	Glyma.01G206500	14	Glyma.01G206500	Glyma.01G206500	mixed_up_down	Glyma.06G047400	20	Glyma.06G047400	Glyma.06G047400	mixed_up_down	0.994236	4.96387e-11	1
	Glyma.01G206500	14	Glyma.01G206500	Glyma.01G206500	mixed_up_down	Glyma.08G249200	15	Glyma.08G249200	Glyma.08G249200	mixed_up_down	0.994246	4.91911e-11	1
	Glyma.01G206500	14	Glyma.01G206500	Glyma.01G206500	mixed_up_down	Glyma.08G269900	18	Glyma.08G269900	Glyma.08G269900	down	0.99317	1.15705e-10	1
	Glyma.01G206500	14	Glyma.01G206500	Glyma.01G206500	mixed_up_down	Glyma.10G229000	10	Glyma.10G229000	Glyma.10G229000	mixed_up_down	0.99267	1.64592e-10	1
	Glyma.01G206500	14	Glyma.01G206500	Glyma.01G206500	mixed_up_down	Glyma.11G131700	4	Glyma.11G131700	Glyma.11G131700	mixed_up_down	0.990037	7.6013e-10	1
	Glyma.01G206500	14	Glyma.01G206500	Glyma.01G206500	mixed_up_down	Glyma.12G021300	16	Glyma.12G021300	Glyma.12G021300	mixed_up_down	0.999399	6.66134e-16	1
	Glyma.01G206500	14	Glyma.01G206500	Glyma.01G206500	mixed_up_down	Glyma.13G282000	11	Glyma.13G282000	Glyma.13G282000	mixed_up_down	0.995975	8.26494e-12	1
	Glyma.01G206500	14	Glyma.01G206500	Glyma.01G206500	mixed_up_down	Glyma.13G342300	18	Glyma.13G342300	Glyma.13G342300	mixed_up_down	0.992291	2.11625e-10	1
	Glyma.01G206500	14	Glyma.01G206500	Glyma.01G206500	mixed_up_down	Glyma.14G029100	17	Glyma.14G029100	Glyma.14G029100	mixed_up_down	0.999109	4.44089e-15	1
	Glyma.01G206500	14	Glyma.01G206500	Glyma.01G206500	mixed_up_down	Glyma.14G067000	17	Glyma.14G067000	Glyma.14G067000	mixed_up_down	0.99139	3.67351e-10	1
	Glyma.01G206500	14	Glyma.01G206500	Glyma.01G206500	mixed_up_down	Glyma.14G106700	14	Glyma.14G106700	Glyma.14G106700	mixed_up_down	0.993558	8.64349e-11	1
	Glyma.01G206500	14	Glyma.01G206500	Glyma.01G206500	mixed_up_down	Glyma.15G065600	15	Glyma.15G065600	Glyma.15G065600	mixed_up_down	0.992553	1.7808e-10	1
56	Glyma.01G209700	7	Glyma.01G209700	Glyma.01G209700	mixed_up_down	Glyma.03G127800	7	Glyma.03G127800	Glyma.03G127800	mixed_up_down	0.992712	1.59931e-10	1
	Glyma.01G209700	7	Glyma.01G209700	Glyma.01G209700	mixed_up_down	Glyma.03G170300	11	Glyma.03G170300	Glyma.03G170300	mixed_up_down	0.991246	3.99053e-10	1
	Glyma.01G209700	7	Glyma.01G209700	Glyma.01G209700	mixed_up_down	Glyma.03G206100	7	Glyma.03G206100	Glyma.03G206100	mixed_up_down	0.99359	8.42957e-11	1
	Glyma.01G209700	7	Glyma.01G209700	Glyma.01G209700	mixed_up_down	Glyma.08G161400	12	Glyma.08G161400	Glyma.08G161400	mixed_up_down	0.992023	2.50977e-10	1
	Glyma.01G209700	7	Glyma.01G209700	Glyma.01G209700	mixed_up_down	Glyma.16G154700	9	Glyma.16G154700	Glyma.16G154700	mixed_up_down	0.994624	3.50393e-11	1
	Glyma.01G209700	7	Glyma.01G209700	Glyma.01G209700	mixed_up_down	Glyma.17G176200	9	Glyma.17G176200	Glyma.17G176200	mixed_up_down	0.994155	5.31921e-11	1
	Glyma.01G209700	7	Glyma.01G209700	Glyma.01G209700	mixed_up_down	Glyma.17G233100	9	Glyma.17G233100	Glyma.17G233100	mixed_up_down	0.996746	2.85816e-12	1
57	Glyma.01G214300	17	Glyma.01G214300	Glyma.01G214300	mixed_up_down	Glyma.01G221200	12	Glyma.01G221200	Glyma.01G221200	up	0.990102	7.35797e-10	1
	Glyma.01G214300	17	Glyma.01G214300	Glyma.01G214300	mixed_up_down	Glyma.03G142800	7	Glyma.03G142800	Glyma.03G142800	mixed_up_down	0.990229	6.89954e-10	1
	Glyma.01G214300	17	Glyma.01G214300	Glyma.01G214300	mixed_up_down	Glyma.04G191700	15	Glyma.04G191700	Glyma.04G191700	up	0.991405	3.64028e-10	1
	Glyma.01G214300	17	Glyma.01G214300	Glyma.01G214300	mixed_up_down	Glyma.05G016000	11	Glyma.05G016000	Glyma.05G016000	mixed_up_down	0.996307	5.37304e-12	1
	Glyma.01G214300	17	Glyma.01G214300	Glyma.01G214300	mixed_up_down	Glyma.07G013500	15	Glyma.07G013500	Glyma.07G013500	mixed_up_down	0.994009	6.01543e-11	1
	Glyma.01G214300	17	Glyma.01G214300	Glyma.01G214300	mixed_up_down	Glyma.08G089700	5	Glyma.08G089700	Glyma.08G089700	mixed_up_down	0.992642	1.67812e-10	1
	Glyma.01G214300	17	Glyma.01G214300	Glyma.01G214300	mixed_up_down	Glyma.10G026600	4	Glyma.10G026600	Glyma.10G026600	up	0.990133	7.24384e-10	1
	Glyma.01G214300	17	Glyma.01G214300	Glyma.01G214300	mixed_up_down	Glyma.12G084000	18	Glyma.12G084000	Glyma.12G084000	mixed_up_down	0.992464	1.89032e-10	1
	Glyma.01G214300	17	Glyma.01G214300	Glyma.01G214300	mixed_up_down	Glyma.13G046200	20	Glyma.13G046200	Glyma.13G046200	mixed_up_down	0.995466	1.49822e-11	1
	Glyma.01G214300	17	Glyma.01G214300	Glyma.01G214300	mixed_up_down	Glyma.14G218200	19	Glyma.14G218200	Glyma.14G218200	mixed_up_down	0.991309	3.84853e-10	1
	Glyma.01G214300	17	Glyma.01G214300	Glyma.01G214300	mixed_up_down	Glyma.16G028500	14	Glyma.16G028500	Glyma.16G028500	mixed_up_down	0.994781	3.02411e-11	1
	Glyma.01G214300	17	Glyma.01G214300	Glyma.01G214300	mixed_up_down	Glyma.16G041700	17	Glyma.16G041700	Glyma.16G041700	mixed_up_down	0.9923	2.10409e-10	1
	Glyma.01G214300	17	Glyma.01G214300	Glyma.01G214300	mixed_up_down	Glyma.16G044900	15	Glyma.16G044900	Glyma.16G044900	mixed_up_down	0.991444	3.5589e-10	1
	Glyma.01G214300	17	Glyma.01G214300	Glyma.01G214300	mixed_up_down	Glyma.17G006800	10	Glyma.17G006800	Glyma.17G006800	mixed_up_down	0.994946	2.57443e-11	1
	Glyma.01G214300	17	Glyma.01G214300	Glyma.01G214300	mixed_up_down	Glyma.18G114900	16	Glyma.18G114900	Glyma.18G114900	mixed_up_down	0.9974	9.31477e-13	1
	Glyma.01G214300	17	Glyma.01G214300	Glyma.01G214300	mixed_up_down	Glyma.19G260600	16	Glyma.19G260600	Glyma.19G260600	mixed_up_down	0.99245	1.90717e-10	1
	Glyma.01G214300	17	Glyma.01G214300	Glyma.01G214300	mixed_up_down	Glyma.20G238300	11	Glyma.20G238300	Glyma.20G238300	mixed_up_down	0.993098	1.2194e-10	1
58	Glyma.01G218600	1	Glyma.01G218600	Glyma.01G218600	mixed_up_down	Glyma.12G046200	1	Glyma.12G046200	Glyma.12G046200	mixed_up_down	0.995436	1.54818e-11	1
59	Glyma.01G221200	12	Glyma.01G221200	Glyma.01G221200	up	Glyma.03G122100	6	Glyma.03G122100	Glyma.03G122100	down	0.992586	1.7422e-10	1
	Glyma.01G221200	12	Glyma.01G221200	Glyma.01G221200	up	Glyma.05G016000	11	Glyma.05G016000	Glyma.05G016000	mixed_up_down	0.995183	2.02522e-11	1
	Glyma.01G221200	12	Glyma.01G221200	Glyma.01G221200	up	Glyma.08G285100	12	Glyma.08G285100	Glyma.08G285100	mixed_up_down	0.995774	1.05451e-11	1
	Glyma.01G221200	12	Glyma.01G221200	Glyma.01G221200	up	Glyma.11G075000	14	Glyma.11G075000	Glyma.11G075000	up	0.991885	2.73423e-10	1
	Glyma.01G221200	12	Glyma.01G221200	Glyma.01G221200	up	Glyma.12G084000	18	Glyma.12G084000	Glyma.12G084000	mixed_up_down	0.993665	7.95075e-11	1
	Glyma.01G221200	12	Glyma.01G221200	Glyma.01G221200	up	Glyma.14G218200	19	Glyma.14G218200	Glyma.14G218200	mixed_up_down	0.991368	3.72046e-10	1
	Glyma.01G221200	12	Glyma.01G221200	Glyma.01G221200	up	Glyma.16G028500	14	Glyma.16G028500	Glyma.16G028500	mixed_up_down	0.991286	3.90008e-10	1
	Glyma.01G221200	12	Glyma.01G221200	Glyma.01G221200	up	Glyma.16G175600	5	Glyma.16G175600	Glyma.16G175600	mixed_up_down	0.992738	1.57141e-10	1
	Glyma.01G221200	12	Glyma.01G221200	Glyma.01G221200	up	Glyma.17G006800	10	Glyma.17G006800	Glyma.17G006800	mixed_up_down	0.995748	1.08709e-11	1
	Glyma.01G221200	12	Glyma.01G221200	Glyma.01G221200	up	Glyma.18G049600	14	Glyma.18G049600	Glyma.18G049600	mixed_up_down	0.99102	4.53135e-10	1
	Glyma.01G221200	12	Glyma.01G221200	Glyma.01G221200	up	Glyma.19G260600	16	Glyma.19G260600	Glyma.19G260600	mixed_up_down	0.996004	7.97096e-12	1
60	Glyma.01G222700	5	Glyma.01G222700	Glyma.01G222700	up	Glyma.04G064500	7	Glyma.04G064500	Glyma.04G064500	mixed_up_down	0.993449	9.3979e-11	1
	Glyma.01G222700	5	Glyma.01G222700	Glyma.01G222700	up	Glyma.05G075100	6	Glyma.05G075100	Glyma.05G075100	mixed_up_down	0.992334	2.05872e-10	1
	Glyma.01G222700	5	Glyma.01G222700	Glyma.01G222700	up	Glyma.11G049900	3	Glyma.11G049900	Glyma.11G049900	mixed_up_down	0.995321	1.7528e-11	1
	Glyma.01G222700	5	Glyma.01G222700	Glyma.01G222700	up	Glyma.12G191500	6	Glyma.12G191500	Glyma.12G191500	mixed_up_down	0.998815	1.84297e-14	1
	Glyma.01G222700	5	Glyma.01G222700	Glyma.01G222700	up	XLOC_040803	7	XLOC_040803	XLOC_040803	mixed_up_down	0.997214	1.3145e-12	1
61	Glyma.01G224400	2	Glyma.01G224400	Glyma.01G224400	mixed_up_down	Glyma.01G240800	1	Glyma.01G240800	Glyma.01G240800	up	0.990195	7.02069e-10	1
	Glyma.01G224400	2	Glyma.01G224400	Glyma.01G224400	mixed_up_down	Glyma.16G072000	1	Glyma.16G072000	Glyma.16G072000	mixed_up_down	0.991677	3.10148e-10	1
62	Glyma.01G224900	1	Glyma.01G224900	Glyma.01G224900	up	Glyma.18G229400	1	Glyma.18G229400	Glyma.18G229400	mixed_up_down	0.990285	6.70666e-10	1
63	Glyma.01G225500	13	Glyma.01G225500	Glyma.01G225500	mixed_up_down	Glyma.04G112800	14	Glyma.04G112800	Glyma.04G112800	down	0.990261	6.78985e-10	1
	Glyma.01G225500	13	Glyma.01G225500	Glyma.01G225500	mixed_up_down	Glyma.06G165700	18	Glyma.06G165700	Glyma.06G165700	mixed_up_down	0.991621	3.20685e-10	1
	Glyma.01G225500	13	Glyma.01G225500	Glyma.01G225500	mixed_up_down	Glyma.06G177500	20	Glyma.06G177500	Glyma.06G177500	mixed_up_down	0.996375	4.90186e-12	1
	Glyma.01G225500	13	Glyma.01G225500	Glyma.01G225500	mixed_up_down	Glyma.08G051000	4	Glyma.08G051000	Glyma.08G051000	mixed_up_down	0.991296	3.87703e-10	1
	Glyma.01G225500	13	Glyma.01G225500	Glyma.01G225500	mixed_up_down	Glyma.09G147500	9	Glyma.09G147500	Glyma.09G147500	mixed_up_down	0.995235	1.91869e-11	1
	Glyma.01G225500	13	Glyma.01G225500	Glyma.01G225500	mixed_up_down	Glyma.09G152100	6	Glyma.09G152100	Glyma.09G152100	mixed_up_down	0.991458	3.53087e-10	1
	Glyma.01G225500	13	Glyma.01G225500	Glyma.01G225500	mixed_up_down	Glyma.10G063800	14	Glyma.10G063800	Glyma.10G063800	mixed_up_down	0.990175	7.09345e-10	1
	Glyma.01G225500	13	Glyma.01G225500	Glyma.01G225500	mixed_up_down	Glyma.10G274300	15	Glyma.10G274300	Glyma.10G274300	mixed_up_down	0.996877	2.3288e-12	1
	Glyma.01G225500	13	Glyma.01G225500	Glyma.01G225500	mixed_up_down	Glyma.13G167200	11	Glyma.13G167200	Glyma.13G167200	mixed_up_down	0.990819	5.05792e-10	1
	Glyma.01G225500	13	Glyma.01G225500	Glyma.01G225500	mixed_up_down	Glyma.14G184600	10	Glyma.14G184600	Glyma.14G184600	mixed_up_down	0.995232	1.92535e-11	1
	Glyma.01G225500	13	Glyma.01G225500	Glyma.01G225500	mixed_up_down	Glyma.20G243500	15	Glyma.20G243500	Glyma.20G243500	mixed_up_down	0.997315	1.09335e-12	1
64	Glyma.01G229800	2	Glyma.01G229800	Glyma.01G229800	mixed_up_down	Glyma.13G372900	6	Glyma.13G372900	Glyma.13G372900	mixed_up_down	0.992731	1.57864e-10	1
	Glyma.01G229800	2	Glyma.01G229800	Glyma.01G229800	mixed_up_down	Glyma.16G145800	7	Glyma.16G145800	Glyma.16G145800	mixed_up_down	0.992873	1.43085e-10	1
65	Glyma.01G236800	3	Glyma.01G236800	Glyma.01G236800	mixed_up_down	Glyma.14G191300	10	Glyma.14G191300	Glyma.14G191300	mixed_up_down	0.99009	7.4036e-10	1
	Glyma.01G236800	3	Glyma.01G236800	Glyma.01G236800	mixed_up_down	Glyma.15G161500	5	Glyma.15G161500	Glyma.15G161500	mixed_up_down	0.99073	5.30857e-10	1
	Glyma.01G236800	3	Glyma.01G236800	Glyma.01G236800	mixed_up_down	Glyma.20G224000	7	Glyma.20G224000	Glyma.20G224000	mixed_up_down	0.994941	2.5866e-11	1
66	Glyma.02G000700	1	Glyma.02G000700	Glyma.02G000700	mixed_up_down	Glyma.10G000500	2	Glyma.10G000500	Glyma.10G000500	mixed_up_down	0.990772	5.18855e-10	1
67	Glyma.02G002000	11	Glyma.02G002000	Glyma.02G002000	mixed_up_down	Glyma.06G149100	11	Glyma.06G149100	Glyma.06G149100	mixed_up_down	0.992079	2.42257e-10	1
	Glyma.02G002000	11	Glyma.02G002000	Glyma.02G002000	mixed_up_down	Glyma.06G298400	2	Glyma.06G298400	Glyma.06G298400	mixed_up_down	0.990122	7.28389e-10	1
	Glyma.02G002000	11	Glyma.02G002000	Glyma.02G002000	mixed_up_down	Glyma.09G073900	10	Glyma.09G073900	Glyma.09G073900	mixed_up_down	0.998115	1.86962e-13	1
	Glyma.02G002000	11	Glyma.02G002000	Glyma.02G002000	mixed_up_down	Glyma.11G175800	16	Glyma.11G175800	Glyma.11G175800	mixed_up_down	0.992493	1.8545e-10	1
	Glyma.02G002000	11	Glyma.02G002000	Glyma.02G002000	mixed_up_down	Glyma.13G342300	18	Glyma.13G342300	Glyma.13G342300	mixed_up_down	0.99131	3.84716e-10	1
	Glyma.02G002000	11	Glyma.02G002000	Glyma.02G002000	mixed_up_down	Glyma.14G001100	7	Glyma.14G001100	Glyma.14G001100	mixed_up_down	0.992838	1.4662e-10	1
	Glyma.02G002000	11	Glyma.02G002000	Glyma.02G002000	mixed_up_down	Glyma.15G065600	15	Glyma.15G065600	Glyma.15G065600	mixed_up_down	0.993616	8.26073e-11	1
	Glyma.02G002000	11	Glyma.02G002000	Glyma.02G002000	mixed_up_down	Glyma.16G089000	6	Glyma.16G089000	Glyma.16G089000	mixed_up_down	0.990072	7.47207e-10	1
	Glyma.02G002000	11	Glyma.02G002000	Glyma.02G002000	mixed_up_down	Glyma.18G165700	7	Glyma.18G165700	Glyma.18G165700	mixed_up_down	0.992214	2.22421e-10	1
	Glyma.02G002000	11	Glyma.02G002000	Glyma.02G002000	mixed_up_down	Glyma.19G026600	6	Glyma.19G026600	Glyma.19G026600	mixed_up_down	0.992321	2.07657e-10	1
	Glyma.02G002000	11	Glyma.02G002000	Glyma.02G002000	mixed_up_down	Glyma.19G196700	16	Glyma.19G196700	Glyma.19G196700	mixed_up_down	0.992913	1.39089e-10	1
68	Glyma.02G005200	1	Glyma.02G005200	Glyma.02G005200	mixed_up_down	Glyma.02G012500	9	Glyma.02G012500	Glyma.02G012500	mixed_up_down	0.99084	5.00187e-10	1
69	Glyma.02G008400	1	Glyma.02G008400	Glyma.02G008400	mixed_up_down	Glyma.20G152500	1	Glyma.20G152500	Glyma.20G152500	mixed_up_down	0.998669	3.28626e-14	1
70	Glyma.02G010200	1	Glyma.02G010200	Glyma.02G010200	mixed_up_down	Glyma.09G154700	12	Glyma.09G154700	Glyma.09G154700	mixed_up_down	0.9919	2.70833e-10	1
71	Glyma.02G011300	1	Glyma.02G011300	Glyma.02G011300	mixed_up_down	Glyma.06G176100	4	Glyma.06G176100	Glyma.06G176100	mixed_up_down	0.994142	5.38161e-11	1
72	Glyma.02G012500	9	Glyma.02G012500	Glyma.02G012500	mixed_up_down	Glyma.02G094900	2	Glyma.02G094900	Glyma.02G094900	mixed_up_down	0.99125	3.98136e-10	1
	Glyma.02G012500	9	Glyma.02G012500	Glyma.02G012500	mixed_up_down	Glyma.06G061000	9	Glyma.06G061000	Glyma.06G061000	mixed_up_down	0.990587	5.72759e-10	1
	Glyma.02G012500	9	Glyma.02G012500	Glyma.02G012500	mixed_up_down	Glyma.08G266500	15	Glyma.08G266500	Glyma.08G266500	mixed_up_down	0.991123	4.27625e-10	1
	Glyma.02G012500	9	Glyma.02G012500	Glyma.02G012500	mixed_up_down	Glyma.11G195100	4	Glyma.11G195100	Glyma.11G195100	mixed_up_down	0.991293	3.88405e-10	1
	Glyma.02G012500	9	Glyma.02G012500	Glyma.02G012500	mixed_up_down	Glyma.12G054700	19	Glyma.12G054700	Glyma.12G054700	mixed_up_down	0.993673	7.90343e-11	1
	Glyma.02G012500	9	Glyma.02G012500	Glyma.02G012500	mixed_up_down	Glyma.15G018000	17	Glyma.15G018000	Glyma.15G018000	mixed_up_down	0.994895	2.70732e-11	1
	Glyma.02G012500	9	Glyma.02G012500	Glyma.02G012500	mixed_up_down	Glyma.16G005300	10	Glyma.16G005300	Glyma.16G005300	mixed_up_down	0.996198	6.21525e-12	1
	Glyma.02G012500	9	Glyma.02G012500	Glyma.02G012500	mixed_up_down	Glyma.20G005800	7	Glyma.20G005800	Glyma.20G005800	mixed_up_down	0.990548	5.84738e-10	1
73	Glyma.02G015000	4	Glyma.02G015000	Glyma.02G015000	mixed_up_down	Glyma.02G215700	7	Glyma.02G215700	Glyma.02G215700	mixed_up_down	0.994394	4.31792e-11	1
	Glyma.02G015000	4	Glyma.02G015000	Glyma.02G015000	mixed_up_down	Glyma.07G091400	8	Glyma.07G091400	Glyma.07G091400	mixed_up_down	0.996958	2.03948e-12	1
	Glyma.02G015000	4	Glyma.02G015000	Glyma.02G015000	mixed_up_down	Glyma.12G117700	6	Glyma.12G117700	Glyma.12G117700	mixed_up_down	0.997244	1.247e-12	1
	Glyma.02G015000	4	Glyma.02G015000	Glyma.02G015000	mixed_up_down	Glyma.19G005900	5	Glyma.19G005900	Glyma.19G005900	mixed_up_down	0.992933	1.37206e-10	1
74	Glyma.02G024800	1	Glyma.02G024800	Glyma.02G024800	mixed_up_down	Glyma.03G069100	1	Glyma.03G069100	Glyma.03G069100	mixed_up_down	0.992457	1.89874e-10	1
75	Glyma.02G031400	78	Glyma.02G031400	Glyma.02G031400	mixed_up_down	Glyma.02G109100	76	Glyma.02G109100	Glyma.02G109100	mixed_up_down	0.997732	4.70735e-13	1
	Glyma.02G031400	78	Glyma.02G031400	Glyma.02G031400	mixed_up_down	Glyma.02G142500	82	Glyma.02G142500	Glyma.02G142500	mixed_up_down	0.998562	4.84057e-14	1
	Glyma.02G031400	78	Glyma.02G031400	Glyma.02G031400	mixed_up_down	Glyma.02G299500	82	Glyma.02G299500	Glyma.02G299500	mixed_up_down	0.994416	4.23537e-11	1
	Glyma.02G031400	78	Glyma.02G031400	Glyma.02G031400	mixed_up_down	Glyma.03G049500	82	Glyma.03G049500	Glyma.03G049500	mixed_up_down	0.994282	4.76892e-11	1
	Glyma.02G031400	78	Glyma.02G031400	Glyma.02G031400	mixed_up_down	Glyma.03G094800	82	Glyma.03G094800	Glyma.03G094800	mixed_up_down	0.994416	4.23537e-11	1
	Glyma.02G031400	78	Glyma.02G031400	Glyma.02G031400	mixed_up_down	Glyma.03G158600	84	Glyma.03G158600	Glyma.03G158600	mixed_up_down	0.994572	3.67726e-11	1
	Glyma.02G031400	78	Glyma.02G031400	Glyma.02G031400	mixed_up_down	Glyma.03G158700	80	Glyma.03G158700	Glyma.03G158700	down	0.999851	0	1
	Glyma.02G031400	78	Glyma.02G031400	Glyma.02G031400	mixed_up_down	Glyma.03G210700	82	Glyma.03G210700	Glyma.03G210700	mixed_up_down	0.991554	3.3369e-10	1
	Glyma.02G031400	78	Glyma.02G031400	Glyma.02G031400	mixed_up_down	Glyma.04G006900	15	Glyma.04G006900	Glyma.04G006900	down	0.994179	5.21041e-11	1
	Glyma.02G031400	78	Glyma.02G031400	Glyma.02G031400	mixed_up_down	Glyma.04G046600	37	Glyma.04G046600	Glyma.04G046600	mixed_up_down	0.990726	5.31894e-10	1
	Glyma.02G031400	78	Glyma.02G031400	Glyma.02G031400	mixed_up_down	Glyma.04G094800	82	Glyma.04G094800	Glyma.04G094800	mixed_up_down	0.994416	4.23537e-11	1
	Glyma.02G031400	78	Glyma.02G031400	Glyma.02G031400	mixed_up_down	Glyma.05G037200	83	Glyma.05G037200	Glyma.05G037200	mixed_up_down	0.996963	2.0246e-12	1
	Glyma.02G031400	78	Glyma.02G031400	Glyma.02G031400	mixed_up_down	Glyma.05G056300	81	Glyma.05G056300	Glyma.05G056300	mixed_up_down	0.991132	4.25645e-10	1
	Glyma.02G031400	78	Glyma.02G031400	Glyma.02G031400	mixed_up_down	Glyma.05G109600	84	Glyma.05G109600	Glyma.05G109600	mixed_up_down	0.998194	1.50768e-13	1
	Glyma.02G031400	78	Glyma.02G031400	Glyma.02G031400	mixed_up_down	Glyma.05G126400	82	Glyma.05G126400	Glyma.05G126400	up	0.995669	1.19096e-11	1
	Glyma.02G031400	78	Glyma.02G031400	Glyma.02G031400	mixed_up_down	Glyma.05G186300	81	Glyma.05G186300	Glyma.05G186300	mixed_up_down	0.996572	3.70459e-12	1
	Glyma.02G031400	78	Glyma.02G031400	Glyma.02G031400	mixed_up_down	Glyma.05G197900	82	Glyma.05G197900	Glyma.05G197900	up	0.993692	7.78377e-11	1
	Glyma.02G031400	78	Glyma.02G031400	Glyma.02G031400	mixed_up_down	Glyma.06G006800	82	Glyma.06G006800	Glyma.06G006800	mixed_up_down	0.996361	4.99512e-12	1
	Glyma.02G031400	78	Glyma.02G031400	Glyma.02G031400	mixed_up_down	Glyma.06G067000	18	Glyma.06G067000	Glyma.06G067000	mixed_up_down	0.995266	1.85802e-11	1
	Glyma.02G031400	78	Glyma.02G031400	Glyma.02G031400	mixed_up_down	Glyma.06G282200	84	Glyma.06G282200	Glyma.06G282200	mixed_up_down	0.99429	4.73395e-11	1
	Glyma.02G031400	78	Glyma.02G031400	Glyma.02G031400	mixed_up_down	Glyma.06G282400	82	Glyma.06G282400	Glyma.06G282400	mixed_up_down	0.994279	4.78155e-11	1
	Glyma.02G031400	78	Glyma.02G031400	Glyma.02G031400	mixed_up_down	Glyma.06G282500	83	Glyma.06G282500	Glyma.06G282500	mixed_up_down	0.994633	3.47511e-11	1
	Glyma.02G031400	78	Glyma.02G031400	Glyma.02G031400	mixed_up_down	Glyma.06G282600	82	Glyma.06G282600	Glyma.06G282600	mixed_up_down	0.994367	4.42637e-11	1
	Glyma.02G031400	78	Glyma.02G031400	Glyma.02G031400	mixed_up_down	Glyma.06G282700	84	Glyma.06G282700	Glyma.06G282700	mixed_up_down	0.994078	5.67937e-11	1
	Glyma.02G031400	78	Glyma.02G031400	Glyma.02G031400	mixed_up_down	Glyma.06G282900	82	Glyma.06G282900	Glyma.06G282900	up	0.994416	4.23537e-11	1
	Glyma.02G031400	78	Glyma.02G031400	Glyma.02G031400	mixed_up_down	Glyma.06G306900	80	Glyma.06G306900	Glyma.06G306900	mixed_up_down	0.990692	5.41655e-10	1
	Glyma.02G031400	78	Glyma.02G031400	Glyma.02G031400	mixed_up_down	Glyma.08G009900	82	Glyma.08G009900	Glyma.08G009900	mixed_up_down	0.999065	5.77316e-15	1
	Glyma.02G031400	78	Glyma.02G031400	Glyma.02G031400	mixed_up_down	Glyma.08G155400	82	Glyma.08G155400	Glyma.08G155400	mixed_up_down	0.994416	4.23537e-11	1
	Glyma.02G031400	78	Glyma.02G031400	Glyma.02G031400	mixed_up_down	Glyma.08G155500	82	Glyma.08G155500	Glyma.08G155500	mixed_up_down	0.994416	4.23537e-11	1
	Glyma.02G031400	78	Glyma.02G031400	Glyma.02G031400	mixed_up_down	Glyma.08G155700	85	Glyma.08G155700	Glyma.08G155700	mixed_up_down	0.995516	1.417e-11	1
	Glyma.02G031400	78	Glyma.02G031400	Glyma.02G031400	mixed_up_down	Glyma.08G232100	28	Glyma.08G232100	Glyma.08G232100	mixed_up_down	0.997532	7.17426e-13	1
	Glyma.02G031400	78	Glyma.02G031400	Glyma.02G031400	mixed_up_down	Glyma.08G232200	84	Glyma.08G232200	Glyma.08G232200	mixed_up_down	0.99454	3.78635e-11	1
	Glyma.02G031400	78	Glyma.02G031400	Glyma.02G031400	mixed_up_down	Glyma.08G328600	80	Glyma.08G328600	Glyma.08G328600	mixed_up_down	0.993933	6.40967e-11	1
	Glyma.02G031400	78	Glyma.02G031400	Glyma.02G031400	mixed_up_down	Glyma.08G342300	82	Glyma.08G342300	Glyma.08G342300	mixed_up_down	0.994416	4.23537e-11	1
	Glyma.02G031400	78	Glyma.02G031400	Glyma.02G031400	mixed_up_down	Glyma.09G221800	82	Glyma.09G221800	Glyma.09G221800	mixed_up_down	0.994247	4.91438e-11	1
	Glyma.02G031400	78	Glyma.02G031400	Glyma.02G031400	mixed_up_down	Glyma.10G017000	82	Glyma.10G017000	Glyma.10G017000	mixed_up_down	0.994416	4.23537e-11	1
	Glyma.02G031400	78	Glyma.02G031400	Glyma.02G031400	mixed_up_down	Glyma.10G056000	37	Glyma.10G056000	Glyma.10G056000	mixed_up_down	0.99358	8.49969e-11	1
	Glyma.02G031400	78	Glyma.02G031400	Glyma.02G031400	mixed_up_down	Glyma.10G056300	77	Glyma.10G056300	Glyma.10G056300	mixed_up_down	0.997416	9.02833e-13	1
	Glyma.02G031400	78	Glyma.02G031400	Glyma.02G031400	mixed_up_down	Glyma.10G296600	84	Glyma.10G296600	Glyma.10G296600	mixed_up_down	0.993943	6.35307e-11	1
	Glyma.02G031400	78	Glyma.02G031400	Glyma.02G031400	mixed_up_down	Glyma.11G120600	82	Glyma.11G120600	Glyma.11G120600	mixed_up_down	0.993177	1.15116e-10	1
	Glyma.02G031400	78	Glyma.02G031400	Glyma.02G031400	mixed_up_down	Glyma.11G179100	82	Glyma.11G179100	Glyma.11G179100	mixed_up_down	0.993052	1.26013e-10	1
	Glyma.02G031400	78	Glyma.02G031400	Glyma.02G031400	mixed_up_down	Glyma.11G238000	81	Glyma.11G238000	Glyma.11G238000	mixed_up_down	0.993587	8.44838e-11	1
	Glyma.02G031400	78	Glyma.02G031400	Glyma.02G031400	mixed_up_down	Glyma.12G035200	18	Glyma.12G035200	Glyma.12G035200	mixed_up_down	0.995184	2.02425e-11	1
	Glyma.02G031400	78	Glyma.02G031400	Glyma.02G031400	mixed_up_down	Glyma.12G122300	83	Glyma.12G122300	Glyma.12G122300	up	0.993106	1.21255e-10	1
	Glyma.02G031400	78	Glyma.02G031400	Glyma.02G031400	mixed_up_down	Glyma.12G124100	82	Glyma.12G124100	Glyma.12G124100	mixed_up_down	0.994416	4.23537e-11	1
	Glyma.02G031400	78	Glyma.02G031400	Glyma.02G031400	mixed_up_down	Glyma.12G124200	82	Glyma.12G124200	Glyma.12G124200	mixed_up_down	0.994416	4.23537e-11	1
	Glyma.02G031400	78	Glyma.02G031400	Glyma.02G031400	mixed_up_down	Glyma.12G124900	82	Glyma.12G124900	Glyma.12G124900	mixed_up_down	0.994416	4.23537e-11	1
	Glyma.02G031400	78	Glyma.02G031400	Glyma.02G031400	mixed_up_down	Glyma.13G091400	82	Glyma.13G091400	Glyma.13G091400	mixed_up_down	0.994416	4.23537e-11	1
	Glyma.02G031400	78	Glyma.02G031400	Glyma.02G031400	mixed_up_down	Glyma.13G165000	85	Glyma.13G165000	Glyma.13G165000	mixed_up_down	0.997928	2.9976e-13	1
	Glyma.02G031400	78	Glyma.02G031400	Glyma.02G031400	mixed_up_down	Glyma.13G218300	81	Glyma.13G218300	Glyma.13G218300	mixed_up_down	0.993269	1.076e-10	1
	Glyma.02G031400	78	Glyma.02G031400	Glyma.02G031400	mixed_up_down	Glyma.13G240500	83	Glyma.13G240500	Glyma.13G240500	down	0.996135	6.74927e-12	1
	Glyma.02G031400	78	Glyma.02G031400	Glyma.02G031400	mixed_up_down	Glyma.13G319700	84	Glyma.13G319700	Glyma.13G319700	mixed_up_down	0.994648	3.42792e-11	1
	Glyma.02G031400	78	Glyma.02G031400	Glyma.02G031400	mixed_up_down	Glyma.14G014200	78	Glyma.14G014200	Glyma.14G014200	mixed_up_down	0.99098	4.63281e-10	1
	Glyma.02G031400	78	Glyma.02G031400	Glyma.02G031400	mixed_up_down	Glyma.15G066200	82	Glyma.15G066200	Glyma.15G066200	mixed_up_down	0.994416	4.23537e-11	1
	Glyma.02G031400	78	Glyma.02G031400	Glyma.02G031400	mixed_up_down	Glyma.15G140200	76	Glyma.15G140200	Glyma.15G140200	mixed_up_down	0.990488	6.03577e-10	1
	Glyma.02G031400	78	Glyma.02G031400	Glyma.02G031400	mixed_up_down	Glyma.15G238600	84	Glyma.15G238600	Glyma.15G238600	up	0.994396	4.31304e-11	1
	Glyma.02G031400	78	Glyma.02G031400	Glyma.02G031400	mixed_up_down	Glyma.16G079500	82	Glyma.16G079500	Glyma.16G079500	mixed_up_down	0.993672	7.90479e-11	1
	Glyma.02G031400	78	Glyma.02G031400	Glyma.02G031400	mixed_up_down	Glyma.16G129600	76	Glyma.16G129600	Glyma.16G129600	mixed_up_down	0.997713	4.90719e-13	1
	Glyma.02G031400	78	Glyma.02G031400	Glyma.02G031400	mixed_up_down	Glyma.17G027300	82	Glyma.17G027300	Glyma.17G027300	mixed_up_down	0.994113	5.5159e-11	1
	Glyma.02G031400	78	Glyma.02G031400	Glyma.02G031400	mixed_up_down	Glyma.17G106100	84	Glyma.17G106100	Glyma.17G106100	mixed_up_down	0.999129	3.9968e-15	1
	Glyma.02G031400	78	Glyma.02G031400	Glyma.02G031400	mixed_up_down	Glyma.17G115300	19	Glyma.17G115300	Glyma.17G115300	mixed_up_down	0.992703	1.60942e-10	1
	Glyma.02G031400	78	Glyma.02G031400	Glyma.02G031400	mixed_up_down	Glyma.17G139400	82	Glyma.17G139400	Glyma.17G139400	mixed_up_down	0.994509	3.89373e-11	1
	Glyma.02G031400	78	Glyma.02G031400	Glyma.02G031400	mixed_up_down	Glyma.17G157400	83	Glyma.17G157400	Glyma.17G157400	mixed_up_down	0.996902	2.23688e-12	1
	Glyma.02G031400	78	Glyma.02G031400	Glyma.02G031400	mixed_up_down	Glyma.18G019300	75	Glyma.18G019300	Glyma.18G019300	mixed_up_down	0.996458	4.36362e-12	1
	Glyma.02G031400	78	Glyma.02G031400	Glyma.02G031400	mixed_up_down	Glyma.18G054000	82	Glyma.18G054000	Glyma.18G054000	up	0.994018	5.97047e-11	1
	Glyma.02G031400	78	Glyma.02G031400	Glyma.02G031400	mixed_up_down	Glyma.18G078200	17	Glyma.18G078200	Glyma.18G078200	mixed_up_down	0.994626	3.49774e-11	1
	Glyma.02G031400	78	Glyma.02G031400	Glyma.02G031400	mixed_up_down	Glyma.18G215100	85	Glyma.18G215100	Glyma.18G215100	mixed_up_down	0.995313	1.76679e-11	1
	Glyma.02G031400	78	Glyma.02G031400	Glyma.02G031400	mixed_up_down	Glyma.18G225000	82	Glyma.18G225000	Glyma.18G225000	mixed_up_down	0.994363	4.43903e-11	1
	Glyma.02G031400	78	Glyma.02G031400	Glyma.02G031400	mixed_up_down	Glyma.19G019600	82	Glyma.19G019600	Glyma.19G019600	mixed_up_down	0.990956	4.69272e-10	1
	Glyma.02G031400	78	Glyma.02G031400	Glyma.02G031400	mixed_up_down	Glyma.19G161100	84	Glyma.19G161100	Glyma.19G161100	down	0.998748	2.42029e-14	1
	Glyma.02G031400	78	Glyma.02G031400	Glyma.02G031400	mixed_up_down	Glyma.20G034100	81	Glyma.20G034100	Glyma.20G034100	mixed_up_down	0.993036	1.27534e-10	1
	Glyma.02G031400	78	Glyma.02G031400	Glyma.02G031400	mixed_up_down	Glyma.20G246300	83	Glyma.20G246300	Glyma.20G246300	mixed_up_down	0.994369	4.41789e-11	1
	Glyma.02G031400	78	Glyma.02G031400	Glyma.02G031400	mixed_up_down	Glyma.20G247400	84	Glyma.20G247400	Glyma.20G247400	mixed_up_down	0.994207	5.0878e-11	1
	Glyma.02G031400	78	Glyma.02G031400	Glyma.02G031400	mixed_up_down	XLOC_001320	76	XLOC_001320	XLOC_001320	down	0.997431	8.78186e-13	1
	Glyma.02G031400	78	Glyma.02G031400	Glyma.02G031400	mixed_up_down	XLOC_029029	82	XLOC_029029	XLOC_029029	mixed_up_down	0.994416	4.23537e-11	1
	Glyma.02G031400	78	Glyma.02G031400	Glyma.02G031400	mixed_up_down	XLOC_040788	37	XLOC_040788	XLOC_040788	mixed_up_down	0.996382	4.85167e-12	1
76	Glyma.02G031600	5	Glyma.02G031600	Glyma.02G031600	mixed_up_down	Glyma.03G234400	6	Glyma.03G234400	Glyma.03G234400	mixed_up_down	0.997109	1.58162e-12	1
	Glyma.02G031600	5	Glyma.02G031600	Glyma.02G031600	mixed_up_down	Glyma.04G216900	9	Glyma.04G216900	Glyma.04G216900	mixed_up_down	0.990228	6.90314e-10	1
	Glyma.02G031600	5	Glyma.02G031600	Glyma.02G031600	mixed_up_down	Glyma.16G016100	9	Glyma.16G016100	Glyma.16G016100	mixed_up_down	0.995106	2.1922e-11	1
	Glyma.02G031600	5	Glyma.02G031600	Glyma.02G031600	mixed_up_down	Glyma.16G089000	6	Glyma.16G089000	Glyma.16G089000	mixed_up_down	0.995895	9.11449e-12	1
	Glyma.02G031600	5	Glyma.02G031600	Glyma.02G031600	mixed_up_down	Glyma.20G212900	10	Glyma.20G212900	Glyma.20G212900	mixed_up_down	0.990808	5.09031e-10	1
77	Glyma.02G035400	29	Glyma.02G035400	Glyma.02G035400	mixed_up_down	Glyma.04G003200	48	Glyma.04G003200	Glyma.04G003200	mixed_up_down	0.993599	8.37406e-11	1
	Glyma.02G035400	29	Glyma.02G035400	Glyma.02G035400	mixed_up_down	Glyma.04G192500	46	Glyma.04G192500	Glyma.04G192500	mixed_up_down	0.993265	1.07921e-10	1
	Glyma.02G035400	29	Glyma.02G035400	Glyma.02G035400	mixed_up_down	Glyma.05G037800	13	Glyma.05G037800	Glyma.05G037800	mixed_up_down	0.993202	1.13032e-10	1
	Glyma.02G035400	29	Glyma.02G035400	Glyma.02G035400	mixed_up_down	Glyma.05G241900	41	Glyma.05G241900	Glyma.05G241900	up	0.990256	6.80427e-10	1
	Glyma.02G035400	29	Glyma.02G035400	Glyma.02G035400	mixed_up_down	Glyma.06G160600	11	Glyma.06G160600	Glyma.06G160600	down	0.994619	3.52109e-11	1
	Glyma.02G035400	29	Glyma.02G035400	Glyma.02G035400	mixed_up_down	Glyma.06G182200	16	Glyma.06G182200	Glyma.06G182200	mixed_up_down	0.995811	1.00921e-11	1
	Glyma.02G035400	29	Glyma.02G035400	Glyma.02G035400	mixed_up_down	Glyma.07G018000	9	Glyma.07G018000	Glyma.07G018000	mixed_up_down	0.991462	3.52295e-10	1
	Glyma.02G035400	29	Glyma.02G035400	Glyma.02G035400	mixed_up_down	Glyma.07G102500	16	Glyma.07G102500	Glyma.07G102500	mixed_up_down	0.993701	7.72498e-11	1
	Glyma.02G035400	29	Glyma.02G035400	Glyma.02G035400	mixed_up_down	Glyma.07G135100	20	Glyma.07G135100	Glyma.07G135100	mixed_up_down	0.996318	5.2951e-12	1
	Glyma.02G035400	29	Glyma.02G035400	Glyma.02G035400	mixed_up_down	Glyma.08G092200	15	Glyma.08G092200	Glyma.08G092200	up	0.994025	5.93894e-11	1
	Glyma.02G035400	29	Glyma.02G035400	Glyma.02G035400	mixed_up_down	Glyma.08G201400	27	Glyma.08G201400	Glyma.08G201400	mixed_up_down	0.99279	1.51617e-10	1
	Glyma.02G035400	29	Glyma.02G035400	Glyma.02G035400	mixed_up_down	Glyma.08G224800	39	Glyma.08G224800	Glyma.08G224800	mixed_up_down	0.991943	2.63803e-10	1
	Glyma.02G035400	29	Glyma.02G035400	Glyma.02G035400	mixed_up_down	Glyma.08G287400	7	Glyma.08G287400	Glyma.08G287400	mixed_up_down	0.990571	5.77719e-10	1
	Glyma.02G035400	29	Glyma.02G035400	Glyma.02G035400	mixed_up_down	Glyma.09G080700	22	Glyma.09G080700	Glyma.09G080700	mixed_up_down	0.992758	1.55038e-10	1
	Glyma.02G035400	29	Glyma.02G035400	Glyma.02G035400	mixed_up_down	Glyma.10G248800	37	Glyma.10G248800	Glyma.10G248800	mixed_up_down	0.990221	6.92665e-10	1
	Glyma.02G035400	29	Glyma.02G035400	Glyma.02G035400	mixed_up_down	Glyma.11G106000	13	Glyma.11G106000	Glyma.11G106000	down	0.99519	2.01117e-11	1
	Glyma.02G035400	29	Glyma.02G035400	Glyma.02G035400	mixed_up_down	Glyma.11G224500	11	Glyma.11G224500	Glyma.11G224500	up	0.992047	2.47292e-10	1
	Glyma.02G035400	29	Glyma.02G035400	Glyma.02G035400	mixed_up_down	Glyma.13G091600	19	Glyma.13G091600	Glyma.13G091600	mixed_up_down	0.995644	1.22635e-11	1
	Glyma.02G035400	29	Glyma.02G035400	Glyma.02G035400	mixed_up_down	Glyma.17G022500	8	Glyma.17G022500	Glyma.17G022500	mixed_up_down	0.993375	9.94096e-11	1
	Glyma.02G035400	29	Glyma.02G035400	Glyma.02G035400	mixed_up_down	Glyma.17G068700	5	Glyma.17G068700	Glyma.17G068700	mixed_up_down	0.990312	6.61214e-10	1
	Glyma.02G035400	29	Glyma.02G035400	Glyma.02G035400	mixed_up_down	Glyma.18G003700	11	Glyma.18G003700	Glyma.18G003700	mixed_up_down	0.991603	3.24107e-10	1
	Glyma.02G035400	29	Glyma.02G035400	Glyma.02G035400	mixed_up_down	Glyma.18G107300	19	Glyma.18G107300	Glyma.18G107300	mixed_up_down	0.99198	2.57797e-10	1
	Glyma.02G035400	29	Glyma.02G035400	Glyma.02G035400	mixed_up_down	Glyma.18G109600	36	Glyma.18G109600	Glyma.18G109600	mixed_up_down	0.997208	1.32871e-12	1
	Glyma.02G035400	29	Glyma.02G035400	Glyma.02G035400	mixed_up_down	Glyma.18G244600	27	Glyma.18G244600	Glyma.18G244600	mixed_up_down	0.994681	3.3221e-11	1
	Glyma.02G035400	29	Glyma.02G035400	Glyma.02G035400	mixed_up_down	Glyma.18G259400	14	Glyma.18G259400	Glyma.18G259400	down	0.991231	4.0249e-10	1
	Glyma.02G035400	29	Glyma.02G035400	Glyma.02G035400	mixed_up_down	Glyma.20G052900	23	Glyma.20G052900	Glyma.20G052900	mixed_up_down	0.991186	4.12752e-10	1
	Glyma.02G035400	29	Glyma.02G035400	Glyma.02G035400	mixed_up_down	Glyma.20G089900	11	Glyma.20G089900	Glyma.20G089900	mixed_up_down	0.991416	3.61779e-10	1
78	Glyma.02G047600	13	Glyma.02G047600	Glyma.02G047600	mixed_up_down	Glyma.04G245200	13	Glyma.04G245200	Glyma.04G245200	mixed_up_down	0.996019	7.82663e-12	1
	Glyma.02G047600	13	Glyma.02G047600	Glyma.02G047600	mixed_up_down	Glyma.06G118000	15	Glyma.06G118000	Glyma.06G118000	mixed_up_down	0.998429	7.52731e-14	1
	Glyma.02G047600	13	Glyma.02G047600	Glyma.02G047600	mixed_up_down	Glyma.07G211100	22	Glyma.07G211100	Glyma.07G211100	mixed_up_down	0.995241	1.9075e-11	1
	Glyma.02G047600	13	Glyma.02G047600	Glyma.02G047600	mixed_up_down	Glyma.08G049200	11	Glyma.08G049200	Glyma.08G049200	mixed_up_down	0.990578	5.75736e-10	1
	Glyma.02G047600	13	Glyma.02G047600	Glyma.02G047600	mixed_up_down	Glyma.10G154300	5	Glyma.10G154300	Glyma.10G154300	mixed_up_down	0.994942	2.58433e-11	1
	Glyma.02G047600	13	Glyma.02G047600	Glyma.02G047600	mixed_up_down	Glyma.11G042200	14	Glyma.11G042200	Glyma.11G042200	mixed_up_down	0.991991	2.56096e-10	1
	Glyma.02G047600	13	Glyma.02G047600	Glyma.02G047600	mixed_up_down	Glyma.13G213200	22	Glyma.13G213200	Glyma.13G213200	mixed_up_down	0.996353	5.0524e-12	1
	Glyma.02G047600	13	Glyma.02G047600	Glyma.02G047600	mixed_up_down	Glyma.15G100200	21	Glyma.15G100200	Glyma.15G100200	mixed_up_down	0.99174	2.98705e-10	1
	Glyma.02G047600	13	Glyma.02G047600	Glyma.02G047600	mixed_up_down	Glyma.16G044900	15	Glyma.16G044900	Glyma.16G044900	mixed_up_down	0.994636	3.46483e-11	1
	Glyma.02G047600	13	Glyma.02G047600	Glyma.02G047600	mixed_up_down	Glyma.18G138300	16	Glyma.18G138300	Glyma.18G138300	mixed_up_down	0.9955	1.4424e-11	1
	Glyma.02G047600	13	Glyma.02G047600	Glyma.02G047600	mixed_up_down	Glyma.19G030900	11	Glyma.19G030900	Glyma.19G030900	mixed_up_down	0.992468	1.8851e-10	1
	Glyma.02G047600	13	Glyma.02G047600	Glyma.02G047600	mixed_up_down	Glyma.20G008600	19	Glyma.20G008600	Glyma.20G008600	mixed_up_down	0.990363	6.43968e-10	1
	Glyma.02G047600	13	Glyma.02G047600	Glyma.02G047600	mixed_up_down	Glyma.20G118700	16	Glyma.20G118700	Glyma.20G118700	mixed_up_down	0.999461	4.44089e-16	1
79	Glyma.02G048800	3	Glyma.02G048800	Glyma.02G048800	mixed_up_down	Glyma.03G008400	8	Glyma.03G008400	Glyma.03G008400	mixed_up_down	0.996552	3.81339e-12	1
	Glyma.02G048800	3	Glyma.02G048800	Glyma.02G048800	mixed_up_down	Glyma.11G022300	15	Glyma.11G022300	Glyma.11G022300	mixed_up_down	0.991966	2.60081e-10	1
	Glyma.02G048800	3	Glyma.02G048800	Glyma.02G048800	mixed_up_down	Glyma.12G021500	14	Glyma.12G021500	Glyma.12G021500	mixed_up_down	0.993177	1.15161e-10	1
80	Glyma.02G049200	58	Glyma.02G049200	Glyma.02G049200	mixed_up_down	Glyma.02G299500	82	Glyma.02G299500	Glyma.02G299500	mixed_up_down	0.991185	4.12916e-10	1
	Glyma.02G049200	58	Glyma.02G049200	Glyma.02G049200	mixed_up_down	Glyma.03G049500	82	Glyma.03G049500	Glyma.03G049500	mixed_up_down	0.990987	4.61439e-10	1
	Glyma.02G049200	58	Glyma.02G049200	Glyma.02G049200	mixed_up_down	Glyma.03G094800	82	Glyma.03G094800	Glyma.03G094800	mixed_up_down	0.991185	4.12916e-10	1
	Glyma.02G049200	58	Glyma.02G049200	Glyma.02G049200	mixed_up_down	Glyma.03G158600	84	Glyma.03G158600	Glyma.03G158600	mixed_up_down	0.992038	2.48691e-10	1
	Glyma.02G049200	58	Glyma.02G049200	Glyma.02G049200	mixed_up_down	Glyma.03G210700	82	Glyma.03G210700	Glyma.03G210700	mixed_up_down	0.993881	6.68772e-11	1
	Glyma.02G049200	58	Glyma.02G049200	Glyma.02G049200	mixed_up_down	Glyma.04G046600	37	Glyma.04G046600	Glyma.04G046600	mixed_up_down	0.9924	1.9717e-10	1
	Glyma.02G049200	58	Glyma.02G049200	Glyma.02G049200	mixed_up_down	Glyma.04G094800	82	Glyma.04G094800	Glyma.04G094800	mixed_up_down	0.991185	4.12916e-10	1
	Glyma.02G049200	58	Glyma.02G049200	Glyma.02G049200	mixed_up_down	Glyma.05G037200	83	Glyma.05G037200	Glyma.05G037200	mixed_up_down	0.990415	6.27049e-10	1
	Glyma.02G049200	58	Glyma.02G049200	Glyma.02G049200	mixed_up_down	Glyma.05G056300	81	Glyma.05G056300	Glyma.05G056300	mixed_up_down	0.992218	2.21842e-10	1
	Glyma.02G049200	58	Glyma.02G049200	Glyma.02G049200	mixed_up_down	Glyma.05G126400	82	Glyma.05G126400	Glyma.05G126400	up	0.990781	5.16482e-10	1
	Glyma.02G049200	58	Glyma.02G049200	Glyma.02G049200	mixed_up_down	Glyma.05G186300	81	Glyma.05G186300	Glyma.05G186300	mixed_up_down	0.992036	2.48902e-10	1
	Glyma.02G049200	58	Glyma.02G049200	Glyma.02G049200	mixed_up_down	Glyma.05G197900	82	Glyma.05G197900	Glyma.05G197900	up	0.99098	4.6318e-10	1
	Glyma.02G049200	58	Glyma.02G049200	Glyma.02G049200	mixed_up_down	Glyma.06G282200	84	Glyma.06G282200	Glyma.06G282200	mixed_up_down	0.991175	4.15326e-10	1
	Glyma.02G049200	58	Glyma.02G049200	Glyma.02G049200	mixed_up_down	Glyma.06G282400	82	Glyma.06G282400	Glyma.06G282400	mixed_up_down	0.991059	4.43287e-10	1
	Glyma.02G049200	58	Glyma.02G049200	Glyma.02G049200	mixed_up_down	Glyma.06G282500	83	Glyma.06G282500	Glyma.06G282500	mixed_up_down	0.992434	1.92768e-10	1
	Glyma.02G049200	58	Glyma.02G049200	Glyma.02G049200	mixed_up_down	Glyma.06G282600	82	Glyma.06G282600	Glyma.06G282600	mixed_up_down	0.991109	4.31073e-10	1
	Glyma.02G049200	58	Glyma.02G049200	Glyma.02G049200	mixed_up_down	Glyma.06G282700	84	Glyma.06G282700	Glyma.06G282700	mixed_up_down	0.992956	1.34954e-10	1
	Glyma.02G049200	58	Glyma.02G049200	Glyma.02G049200	mixed_up_down	Glyma.06G282900	82	Glyma.06G282900	Glyma.06G282900	up	0.991185	4.12916e-10	1
	Glyma.02G049200	58	Glyma.02G049200	Glyma.02G049200	mixed_up_down	Glyma.06G306900	80	Glyma.06G306900	Glyma.06G306900	mixed_up_down	0.991462	3.52198e-10	1
	Glyma.02G049200	58	Glyma.02G049200	Glyma.02G049200	mixed_up_down	Glyma.08G155400	82	Glyma.08G155400	Glyma.08G155400	mixed_up_down	0.991185	4.12916e-10	1
	Glyma.02G049200	58	Glyma.02G049200	Glyma.02G049200	mixed_up_down	Glyma.08G155500	82	Glyma.08G155500	Glyma.08G155500	mixed_up_down	0.991185	4.12916e-10	1
	Glyma.02G049200	58	Glyma.02G049200	Glyma.02G049200	mixed_up_down	Glyma.08G155700	85	Glyma.08G155700	Glyma.08G155700	mixed_up_down	0.992474	1.8777e-10	1
	Glyma.02G049200	58	Glyma.02G049200	Glyma.02G049200	mixed_up_down	Glyma.08G232200	84	Glyma.08G232200	Glyma.08G232200	mixed_up_down	0.992208	2.23302e-10	1
	Glyma.02G049200	58	Glyma.02G049200	Glyma.02G049200	mixed_up_down	Glyma.08G328600	80	Glyma.08G328600	Glyma.08G328600	mixed_up_down	0.994374	4.39584e-11	1
	Glyma.02G049200	58	Glyma.02G049200	Glyma.02G049200	mixed_up_down	Glyma.08G342300	82	Glyma.08G342300	Glyma.08G342300	mixed_up_down	0.991185	4.12916e-10	1
	Glyma.02G049200	58	Glyma.02G049200	Glyma.02G049200	mixed_up_down	Glyma.09G117900	74	Glyma.09G117900	Glyma.09G117900	down	0.990187	7.05022e-10	1
	Glyma.02G049200	58	Glyma.02G049200	Glyma.02G049200	mixed_up_down	Glyma.09G221800	82	Glyma.09G221800	Glyma.09G221800	mixed_up_down	0.990939	4.73781e-10	1
	Glyma.02G049200	58	Glyma.02G049200	Glyma.02G049200	mixed_up_down	Glyma.10G017000	82	Glyma.10G017000	Glyma.10G017000	mixed_up_down	0.991185	4.12916e-10	1
	Glyma.02G049200	58	Glyma.02G049200	Glyma.02G049200	mixed_up_down	Glyma.10G296600	84	Glyma.10G296600	Glyma.10G296600	mixed_up_down	0.991881	2.74019e-10	1
	Glyma.02G049200	58	Glyma.02G049200	Glyma.02G049200	mixed_up_down	Glyma.11G120600	82	Glyma.11G120600	Glyma.11G120600	mixed_up_down	0.990657	5.52e-10	1
	Glyma.02G049200	58	Glyma.02G049200	Glyma.02G049200	mixed_up_down	Glyma.11G179100	82	Glyma.11G179100	Glyma.11G179100	mixed_up_down	0.992847	1.45754e-10	1
	Glyma.02G049200	58	Glyma.02G049200	Glyma.02G049200	mixed_up_down	Glyma.11G238000	81	Glyma.11G238000	Glyma.11G238000	mixed_up_down	0.992935	1.37021e-10	1
	Glyma.02G049200	58	Glyma.02G049200	Glyma.02G049200	mixed_up_down	Glyma.12G122300	83	Glyma.12G122300	Glyma.12G122300	up	0.992759	1.54932e-10	1
	Glyma.02G049200	58	Glyma.02G049200	Glyma.02G049200	mixed_up_down	Glyma.12G124100	82	Glyma.12G124100	Glyma.12G124100	mixed_up_down	0.991185	4.12916e-10	1
	Glyma.02G049200	58	Glyma.02G049200	Glyma.02G049200	mixed_up_down	Glyma.12G124200	82	Glyma.12G124200	Glyma.12G124200	mixed_up_down	0.991185	4.12916e-10	1
	Glyma.02G049200	58	Glyma.02G049200	Glyma.02G049200	mixed_up_down	Glyma.12G124900	82	Glyma.12G124900	Glyma.12G124900	mixed_up_down	0.991185	4.12916e-10	1
	Glyma.02G049200	58	Glyma.02G049200	Glyma.02G049200	mixed_up_down	Glyma.13G091400	82	Glyma.13G091400	Glyma.13G091400	mixed_up_down	0.991185	4.12916e-10	1
	Glyma.02G049200	58	Glyma.02G049200	Glyma.02G049200	mixed_up_down	Glyma.13G165000	85	Glyma.13G165000	Glyma.13G165000	mixed_up_down	0.990708	5.37143e-10	1
	Glyma.02G049200	58	Glyma.02G049200	Glyma.02G049200	mixed_up_down	Glyma.13G240500	83	Glyma.13G240500	Glyma.13G240500	down	0.991825	2.83566e-10	1
	Glyma.02G049200	58	Glyma.02G049200	Glyma.02G049200	mixed_up_down	Glyma.13G319700	84	Glyma.13G319700	Glyma.13G319700	mixed_up_down	0.992194	2.25258e-10	1
	Glyma.02G049200	58	Glyma.02G049200	Glyma.02G049200	mixed_up_down	Glyma.14G014200	78	Glyma.14G014200	Glyma.14G014200	mixed_up_down	0.99011	7.32851e-10	1
	Glyma.02G049200	58	Glyma.02G049200	Glyma.02G049200	mixed_up_down	Glyma.14G176500	66	Glyma.14G176500	Glyma.14G176500	mixed_up_down	0.995946	8.56515e-12	1
	Glyma.02G049200	58	Glyma.02G049200	Glyma.02G049200	mixed_up_down	Glyma.15G066200	82	Glyma.15G066200	Glyma.15G066200	mixed_up_down	0.991185	4.12916e-10	1
	Glyma.02G049200	58	Glyma.02G049200	Glyma.02G049200	mixed_up_down	Glyma.15G140200	76	Glyma.15G140200	Glyma.15G140200	mixed_up_down	0.991783	2.90894e-10	1
	Glyma.02G049200	58	Glyma.02G049200	Glyma.02G049200	mixed_up_down	Glyma.15G238600	84	Glyma.15G238600	Glyma.15G238600	up	0.992843	1.46131e-10	1
	Glyma.02G049200	58	Glyma.02G049200	Glyma.02G049200	mixed_up_down	Glyma.16G043500	78	Glyma.16G043500	Glyma.16G043500	mixed_up_down	0.991571	3.30359e-10	1
	Glyma.02G049200	58	Glyma.02G049200	Glyma.02G049200	mixed_up_down	Glyma.16G079500	82	Glyma.16G079500	Glyma.16G079500	mixed_up_down	0.992608	1.71709e-10	1
	Glyma.02G049200	58	Glyma.02G049200	Glyma.02G049200	mixed_up_down	Glyma.17G027300	82	Glyma.17G027300	Glyma.17G027300	mixed_up_down	0.990759	5.22579e-10	1
	Glyma.02G049200	58	Glyma.02G049200	Glyma.02G049200	mixed_up_down	Glyma.17G139400	82	Glyma.17G139400	Glyma.17G139400	mixed_up_down	0.991457	3.53316e-10	1
	Glyma.02G049200	58	Glyma.02G049200	Glyma.02G049200	mixed_up_down	Glyma.17G157400	83	Glyma.17G157400	Glyma.17G157400	mixed_up_down	0.99028	6.72148e-10	1
	Glyma.02G049200	58	Glyma.02G049200	Glyma.02G049200	mixed_up_down	Glyma.18G054000	82	Glyma.18G054000	Glyma.18G054000	up	0.990635	5.58588e-10	1
	Glyma.02G049200	58	Glyma.02G049200	Glyma.02G049200	mixed_up_down	Glyma.18G215100	85	Glyma.18G215100	Glyma.18G215100	mixed_up_down	0.992286	2.12406e-10	1
	Glyma.02G049200	58	Glyma.02G049200	Glyma.02G049200	mixed_up_down	Glyma.18G225000	82	Glyma.18G225000	Glyma.18G225000	mixed_up_down	0.991216	4.05802e-10	1
	Glyma.02G049200	58	Glyma.02G049200	Glyma.02G049200	mixed_up_down	Glyma.19G019600	82	Glyma.19G019600	Glyma.19G019600	mixed_up_down	0.991764	2.94309e-10	1
	Glyma.02G049200	58	Glyma.02G049200	Glyma.02G049200	mixed_up_down	Glyma.20G246300	83	Glyma.20G246300	Glyma.20G246300	mixed_up_down	0.99254	1.79669e-10	1
	Glyma.02G049200	58	Glyma.02G049200	Glyma.02G049200	mixed_up_down	Glyma.20G247400	84	Glyma.20G247400	Glyma.20G247400	mixed_up_down	0.991084	4.37114e-10	1
	Glyma.02G049200	58	Glyma.02G049200	Glyma.02G049200	mixed_up_down	XLOC_029029	82	XLOC_029029	XLOC_029029	mixed_up_down	0.991185	4.12916e-10	1
81	Glyma.02G054400	1	Glyma.02G054400	Glyma.02G054400	mixed_up_down	Glyma.04G154200	1	Glyma.04G154200	Glyma.04G154200	mixed_up_down	0.992674	1.64202e-10	1
	Glyma.02G059400	1	Glyma.02G059400	Glyma.02G059400	mixed_up_down	Glyma.20G151700	1	Glyma.20G151700	Glyma.20G151700	mixed_up_down	0.991346	3.76705e-10	1
82	Glyma.02G061100	25	Glyma.02G061100	Glyma.02G061100	down	Glyma.02G126300	22	Glyma.02G126300	Glyma.02G126300	mixed_up_down	0.992308	2.09334e-10	1
	Glyma.02G061100	25	Glyma.02G061100	Glyma.02G061100	down	Glyma.05G002000	12	Glyma.05G002000	Glyma.05G002000	mixed_up_down	0.990222	6.92617e-10	1
	Glyma.02G061100	25	Glyma.02G061100	Glyma.02G061100	down	Glyma.05G148700	20	Glyma.05G148700	Glyma.05G148700	mixed_up_down	0.99334	1.02009e-10	1
	Glyma.02G061100	25	Glyma.02G061100	Glyma.02G061100	down	Glyma.06G047400	20	Glyma.06G047400	Glyma.06G047400	mixed_up_down	0.992414	1.95393e-10	1
	Glyma.02G061100	25	Glyma.02G061100	Glyma.02G061100	down	Glyma.08G158200	12	Glyma.08G158200	Glyma.08G158200	mixed_up_down	0.992417	1.9503e-10	1
	Glyma.02G061100	25	Glyma.02G061100	Glyma.02G061100	down	Glyma.08G199000	15	Glyma.08G199000	Glyma.08G199000	mixed_up_down	0.990092	7.39494e-10	1
	Glyma.02G061100	25	Glyma.02G061100	Glyma.02G061100	down	Glyma.08G247300	21	Glyma.08G247300	Glyma.08G247300	mixed_up_down	0.993298	1.05283e-10	1
	Glyma.02G061100	25	Glyma.02G061100	Glyma.02G061100	down	Glyma.10G263400	16	Glyma.10G263400	Glyma.10G263400	mixed_up_down	0.991849	2.79544e-10	1
	Glyma.02G061100	25	Glyma.02G061100	Glyma.02G061100	down	Glyma.11G175800	16	Glyma.11G175800	Glyma.11G175800	mixed_up_down	0.990823	5.04658e-10	1
	Glyma.02G061100	25	Glyma.02G061100	Glyma.02G061100	down	Glyma.13G068600	17	Glyma.13G068600	Glyma.13G068600	mixed_up_down	0.994529	3.82354e-11	1
	Glyma.02G061100	25	Glyma.02G061100	Glyma.02G061100	down	Glyma.13G120500	14	Glyma.13G120500	Glyma.13G120500	down	0.990094	7.38671e-10	1
	Glyma.02G061100	25	Glyma.02G061100	Glyma.02G061100	down	Glyma.13G129500	20	Glyma.13G129500	Glyma.13G129500	mixed_up_down	0.991322	3.81963e-10	1
	Glyma.02G061100	25	Glyma.02G061100	Glyma.02G061100	down	Glyma.13G213500	16	Glyma.13G213500	Glyma.13G213500	mixed_up_down	0.99486	2.80123e-11	1
	Glyma.02G061100	25	Glyma.02G061100	Glyma.02G061100	down	Glyma.13G365400	17	Glyma.13G365400	Glyma.13G365400	mixed_up_down	0.991256	3.96613e-10	1
	Glyma.02G061100	25	Glyma.02G061100	Glyma.02G061100	down	Glyma.15G021300	18	Glyma.15G021300	Glyma.15G021300	mixed_up_down	0.995883	9.25238e-12	1
	Glyma.02G061100	25	Glyma.02G061100	Glyma.02G061100	down	Glyma.15G056500	8	Glyma.15G056500	Glyma.15G056500	down	0.99249	1.85723e-10	1
	Glyma.02G061100	25	Glyma.02G061100	Glyma.02G061100	down	Glyma.15G101800	16	Glyma.15G101800	Glyma.15G101800	mixed_up_down	0.992896	1.40843e-10	1
	Glyma.02G061100	25	Glyma.02G061100	Glyma.02G061100	down	Glyma.15G194300	14	Glyma.15G194300	Glyma.15G194300	down	0.991346	3.76775e-10	1
	Glyma.02G061100	25	Glyma.02G061100	Glyma.02G061100	down	Glyma.16G095000	18	Glyma.16G095000	Glyma.16G095000	mixed_up_down	0.990997	4.58925e-10	1
	Glyma.02G061100	25	Glyma.02G061100	Glyma.02G061100	down	Glyma.16G153000	21	Glyma.16G153000	Glyma.16G153000	mixed_up_down	0.996662	3.2474e-12	1
	Glyma.02G061100	25	Glyma.02G061100	Glyma.02G061100	down	Glyma.17G006100	15	Glyma.17G006100	Glyma.17G006100	mixed_up_down	0.991434	3.57955e-10	1
	Glyma.02G061100	25	Glyma.02G061100	Glyma.02G061100	down	Glyma.17G174500	18	Glyma.17G174500	Glyma.17G174500	mixed_up_down	0.9964	4.73621e-12	1
	Glyma.02G061100	25	Glyma.02G061100	Glyma.02G061100	down	Glyma.18G218700	21	Glyma.18G218700	Glyma.18G218700	mixed_up_down	0.997768	4.34763e-13	1
	Glyma.02G061100	25	Glyma.02G061100	Glyma.02G061100	down	Glyma.19G015000	20	Glyma.19G015000	Glyma.19G015000	mixed_up_down	0.999279	1.55431e-15	1
	Glyma.02G061100	25	Glyma.02G061100	Glyma.02G061100	down	Glyma.20G119000	17	Glyma.20G119000	Glyma.20G119000	mixed_up_down	0.99356	8.62794e-11	1
83	Glyma.02G063600	25	Glyma.02G063600	Glyma.02G063600	mixed_up_down	Glyma.02G241400	38	Glyma.02G241400	Glyma.02G241400	up	0.993068	1.2464e-10	1
	Glyma.02G063600	25	Glyma.02G063600	Glyma.02G063600	mixed_up_down	Glyma.04G167800	34	Glyma.04G167800	Glyma.04G167800	mixed_up_down	0.992554	1.77966e-10	1
	Glyma.02G063600	25	Glyma.02G063600	Glyma.02G063600	mixed_up_down	Glyma.04G172500	36	Glyma.04G172500	Glyma.04G172500	mixed_up_down	0.991601	3.24606e-10	1
	Glyma.02G063600	25	Glyma.02G063600	Glyma.02G063600	mixed_up_down	Glyma.04G192500	46	Glyma.04G192500	Glyma.04G192500	mixed_up_down	0.991576	3.29419e-10	1
	Glyma.02G063600	25	Glyma.02G063600	Glyma.02G063600	mixed_up_down	Glyma.04G198500	35	Glyma.04G198500	Glyma.04G198500	mixed_up_down	0.991942	2.64023e-10	1
	Glyma.02G063600	25	Glyma.02G063600	Glyma.02G063600	mixed_up_down	Glyma.05G213700	42	Glyma.05G213700	Glyma.05G213700	mixed_up_down	0.994099	5.58056e-11	1
	Glyma.02G063600	25	Glyma.02G063600	Glyma.02G063600	mixed_up_down	Glyma.05G241900	41	Glyma.05G241900	Glyma.05G241900	up	0.993108	1.21045e-10	1
	Glyma.02G063600	25	Glyma.02G063600	Glyma.02G063600	mixed_up_down	Glyma.06G160400	38	Glyma.06G160400	Glyma.06G160400	mixed_up_down	0.992045	2.4754e-10	1
	Glyma.02G063600	25	Glyma.02G063600	Glyma.02G063600	mixed_up_down	Glyma.06G313500	33	Glyma.06G313500	Glyma.06G313500	mixed_up_down	0.991371	3.71302e-10	1
	Glyma.02G063600	25	Glyma.02G063600	Glyma.02G063600	mixed_up_down	Glyma.07G089700	4	Glyma.07G089700	Glyma.07G089700	mixed_up_down	0.991176	4.15046e-10	1
	Glyma.02G063600	25	Glyma.02G063600	Glyma.02G063600	mixed_up_down	Glyma.08G120300	37	Glyma.08G120300	Glyma.08G120300	mixed_up_down	0.992415	1.95187e-10	1
	Glyma.02G063600	25	Glyma.02G063600	Glyma.02G063600	mixed_up_down	Glyma.08G163400	41	Glyma.08G163400	Glyma.08G163400	mixed_up_down	0.993301	1.05072e-10	1
	Glyma.02G063600	25	Glyma.02G063600	Glyma.02G063600	mixed_up_down	Glyma.08G212800	33	Glyma.08G212800	Glyma.08G212800	down	0.991862	2.77352e-10	1
	Glyma.02G063600	25	Glyma.02G063600	Glyma.02G063600	mixed_up_down	Glyma.08G253200	39	Glyma.08G253200	Glyma.08G253200	down	0.993432	9.52314e-11	1
	Glyma.02G063600	25	Glyma.02G063600	Glyma.02G063600	mixed_up_down	Glyma.10G164100	35	Glyma.10G164100	Glyma.10G164100	mixed_up_down	0.991343	3.7745e-10	1
	Glyma.02G063600	25	Glyma.02G063600	Glyma.02G063600	mixed_up_down	Glyma.10G172200	32	Glyma.10G172200	Glyma.10G172200	mixed_up_down	0.990429	6.22588e-10	1
	Glyma.02G063600	25	Glyma.02G063600	Glyma.02G063600	mixed_up_down	Glyma.11G244300	32	Glyma.11G244300	Glyma.11G244300	mixed_up_down	0.993898	6.59639e-11	1
	Glyma.02G063600	25	Glyma.02G063600	Glyma.02G063600	mixed_up_down	Glyma.13G177600	38	Glyma.13G177600	Glyma.13G177600	mixed_up_down	0.995673	1.18587e-11	1
	Glyma.02G063600	25	Glyma.02G063600	Glyma.02G063600	mixed_up_down	Glyma.14G189500	33	Glyma.14G189500	Glyma.14G189500	mixed_up_down	0.990089	7.4068e-10	1
	Glyma.02G063600	25	Glyma.02G063600	Glyma.02G063600	mixed_up_down	Glyma.20G131100	36	Glyma.20G131100	Glyma.20G131100	mixed_up_down	0.992362	2.02158e-10	1
	Glyma.02G063600	25	Glyma.02G063600	Glyma.02G063600	mixed_up_down	XLOC_022764	35	XLOC_022764	XLOC_022764	mixed_up_down	0.99369	7.79248e-11	1
84	Glyma.02G072200	5	Glyma.02G072200	Glyma.02G072200	down	Glyma.03G032300	6	Glyma.03G032300	Glyma.03G032300	mixed_up_down	0.992922	1.38216e-10	1
	Glyma.02G072200	5	Glyma.02G072200	Glyma.02G072200	down	Glyma.04G064500	7	Glyma.04G064500	Glyma.04G064500	mixed_up_down	0.991018	4.53438e-10	1
	Glyma.02G072200	5	Glyma.02G072200	Glyma.02G072200	down	Glyma.05G075100	6	Glyma.05G075100	Glyma.05G075100	mixed_up_down	0.992653	1.66501e-10	1
	Glyma.02G072200	5	Glyma.02G072200	Glyma.02G072200	down	Glyma.12G191500	6	Glyma.12G191500	Glyma.12G191500	mixed_up_down	0.990763	5.21567e-10	1
	Glyma.02G072200	5	Glyma.02G072200	Glyma.02G072200	down	XLOC_040803	7	XLOC_040803	XLOC_040803	mixed_up_down	0.994228	4.99822e-11	1
85	Glyma.02G074000	12	Glyma.02G074000	Glyma.02G074000	mixed_up_down	Glyma.03G014000	11	Glyma.03G014000	Glyma.03G014000	mixed_up_down	0.99186	2.77559e-10	1
	Glyma.02G074000	12	Glyma.02G074000	Glyma.02G074000	mixed_up_down	Glyma.03G208300	16	Glyma.03G208300	Glyma.03G208300	mixed_up_down	0.990984	4.62175e-10	1
	Glyma.02G074000	12	Glyma.02G074000	Glyma.02G074000	mixed_up_down	Glyma.05G192600	15	Glyma.05G192600	Glyma.05G192600	mixed_up_down	0.995125	2.15044e-11	1
	Glyma.02G074000	12	Glyma.02G074000	Glyma.02G074000	mixed_up_down	Glyma.05G200500	18	Glyma.05G200500	Glyma.05G200500	mixed_up_down	0.994992	2.46099e-11	1
	Glyma.02G074000	12	Glyma.02G074000	Glyma.02G074000	mixed_up_down	Glyma.08G135000	16	Glyma.08G135000	Glyma.08G135000	mixed_up_down	0.994289	4.74061e-11	1
	Glyma.02G074000	12	Glyma.02G074000	Glyma.02G074000	mixed_up_down	Glyma.08G150400	12	Glyma.08G150400	Glyma.08G150400	mixed_up_down	0.99281	1.49557e-10	1
	Glyma.02G074000	12	Glyma.02G074000	Glyma.02G074000	mixed_up_down	Glyma.08G213000	17	Glyma.08G213000	Glyma.08G213000	mixed_up_down	0.993164	1.16193e-10	1
	Glyma.02G074000	12	Glyma.02G074000	Glyma.02G074000	mixed_up_down	Glyma.08G336100	14	Glyma.08G336100	Glyma.08G336100	mixed_up_down	0.997119	1.55631e-12	1
	Glyma.02G074000	12	Glyma.02G074000	Glyma.02G074000	mixed_up_down	Glyma.10G010800	13	Glyma.10G010800	Glyma.10G010800	mixed_up_down	0.996049	7.53375e-12	1
	Glyma.02G074000	12	Glyma.02G074000	Glyma.02G074000	mixed_up_down	Glyma.10G072700	14	Glyma.10G072700	Glyma.10G072700	mixed_up_down	0.992343	2.04682e-10	1
	Glyma.02G074000	12	Glyma.02G074000	Glyma.02G074000	mixed_up_down	Glyma.10G285200	15	Glyma.10G285200	Glyma.10G285200	mixed_up_down	0.99564	1.23164e-11	1
86	Glyma.02G085800	4	Glyma.02G085800	Glyma.02G085800	down	Glyma.02G283500	9	Glyma.02G283500	Glyma.02G283500	mixed_up_down	0.993533	8.81273e-11	1
	Glyma.02G085800	4	Glyma.02G085800	Glyma.02G085800	down	Glyma.05G213600	5	Glyma.05G213600	Glyma.05G213600	mixed_up_down	0.996085	7.19402e-12	1
	Glyma.02G085800	4	Glyma.02G085800	Glyma.02G085800	down	Glyma.07G166400	12	Glyma.07G166400	Glyma.07G166400	mixed_up_down	0.991163	4.18208e-10	1
	Glyma.02G085800	4	Glyma.02G085800	Glyma.02G085800	down	Glyma.20G187400	7	Glyma.20G187400	Glyma.20G187400	mixed_up_down	0.997529	7.22089e-13	1
87	Glyma.02G090000	1	Glyma.02G090000	Glyma.02G090000	mixed_up_down	Glyma.12G081100	1	Glyma.12G081100	Glyma.12G081100	up	0.990926	4.77196e-10	1
88	Glyma.02G094900	2	Glyma.02G094900	Glyma.02G094900	mixed_up_down	Glyma.20G005800	7	Glyma.20G005800	Glyma.20G005800	mixed_up_down	0.994133	5.42073e-11	1
89	Glyma.02G095700	11	Glyma.02G095700	Glyma.02G095700	mixed_up_down	Glyma.03G135100	10	Glyma.03G135100	Glyma.03G135100	mixed_up_down	0.998999	7.99361e-15	1
	Glyma.02G095700	11	Glyma.02G095700	Glyma.02G095700	mixed_up_down	Glyma.03G166300	15	Glyma.03G166300	Glyma.03G166300	mixed_up_down	0.994276	4.79132e-11	1
	Glyma.02G095700	11	Glyma.02G095700	Glyma.02G095700	mixed_up_down	Glyma.03G200600	16	Glyma.03G200600	Glyma.03G200600	mixed_up_down	0.995059	2.30049e-11	1
	Glyma.02G095700	11	Glyma.02G095700	Glyma.02G095700	mixed_up_down	Glyma.03G239800	6	Glyma.03G239800	Glyma.03G239800	up	0.992757	1.55082e-10	1
	Glyma.02G095700	11	Glyma.02G095700	Glyma.02G095700	mixed_up_down	Glyma.04G084200	13	Glyma.04G084200	Glyma.04G084200	down	0.990671	5.47929e-10	1
	Glyma.02G095700	11	Glyma.02G095700	Glyma.02G095700	mixed_up_down	Glyma.10G080700	10	Glyma.10G080700	Glyma.10G080700	mixed_up_down	0.996523	3.97971e-12	1
	Glyma.02G095700	11	Glyma.02G095700	Glyma.02G095700	mixed_up_down	Glyma.10G097400	11	Glyma.10G097400	Glyma.10G097400	mixed_up_down	0.991852	2.79023e-10	1
	Glyma.02G095700	11	Glyma.02G095700	Glyma.02G095700	mixed_up_down	Glyma.10G291000	13	Glyma.10G291000	Glyma.10G291000	mixed_up_down	0.990212	6.95957e-10	1
	Glyma.02G095700	11	Glyma.02G095700	Glyma.02G095700	mixed_up_down	XLOC_009033	12	XLOC_009033	XLOC_009033	mixed_up_down	0.999595	0	1
	Glyma.02G095700	11	Glyma.02G095700	Glyma.02G095700	mixed_up_down	XLOC_020313	11	XLOC_020313	XLOC_020313	mixed_up_down	0.991415	3.61925e-10	1
	Glyma.02G095700	11	Glyma.02G095700	Glyma.02G095700	mixed_up_down	XLOC_026551	12	XLOC_026551	XLOC_026551	mixed_up_down	0.990471	6.09102e-10	1
90	Glyma.02G096500	1	Glyma.02G096500	Glyma.02G096500	mixed_up_down	Glyma.02G215700	7	Glyma.02G215700	Glyma.02G215700	mixed_up_down	0.993952	6.30975e-11	1
91	Glyma.02G097400	70	Glyma.02G097400	Glyma.02G097400	up	Glyma.02G109100	76	Glyma.02G109100	Glyma.02G109100	mixed_up_down	0.993664	7.95843e-11	1
	Glyma.02G097400	70	Glyma.02G097400	Glyma.02G097400	up	Glyma.02G221900	32	Glyma.02G221900	Glyma.02G221900	mixed_up_down	0.994884	2.73568e-11	1
	Glyma.02G097400	70	Glyma.02G097400	Glyma.02G097400	up	Glyma.02G299500	82	Glyma.02G299500	Glyma.02G299500	mixed_up_down	0.992925	1.3797e-10	1
	Glyma.02G097400	70	Glyma.02G097400	Glyma.02G097400	up	Glyma.03G049500	82	Glyma.03G049500	Glyma.03G049500	mixed_up_down	0.993247	1.09352e-10	1
	Glyma.02G097400	70	Glyma.02G097400	Glyma.02G097400	up	Glyma.03G094800	82	Glyma.03G094800	Glyma.03G094800	mixed_up_down	0.992925	1.3797e-10	1
	Glyma.02G097400	70	Glyma.02G097400	Glyma.02G097400	up	Glyma.03G158600	84	Glyma.03G158600	Glyma.03G158600	mixed_up_down	0.994008	6.02212e-11	1
	Glyma.02G097400	70	Glyma.02G097400	Glyma.02G097400	up	Glyma.03G210700	82	Glyma.03G210700	Glyma.03G210700	mixed_up_down	0.991497	3.45063e-10	1
	Glyma.02G097400	70	Glyma.02G097400	Glyma.02G097400	up	Glyma.03G227500	14	Glyma.03G227500	Glyma.03G227500	mixed_up_down	0.99434	4.53033e-11	1
	Glyma.02G097400	70	Glyma.02G097400	Glyma.02G097400	up	Glyma.04G094800	82	Glyma.04G094800	Glyma.04G094800	mixed_up_down	0.992925	1.3797e-10	1
	Glyma.02G097400	70	Glyma.02G097400	Glyma.02G097400	up	Glyma.05G037200	83	Glyma.05G037200	Glyma.05G037200	mixed_up_down	0.992071	2.43519e-10	1
	Glyma.02G097400	70	Glyma.02G097400	Glyma.02G097400	up	Glyma.05G056300	81	Glyma.05G056300	Glyma.05G056300	mixed_up_down	0.995408	1.59575e-11	1
	Glyma.02G097400	70	Glyma.02G097400	Glyma.02G097400	up	Glyma.05G109600	84	Glyma.05G109600	Glyma.05G109600	mixed_up_down	0.991297	3.87437e-10	1
	Glyma.02G097400	70	Glyma.02G097400	Glyma.02G097400	up	Glyma.05G126400	82	Glyma.05G126400	Glyma.05G126400	up	0.992452	1.90469e-10	1
	Glyma.02G097400	70	Glyma.02G097400	Glyma.02G097400	up	Glyma.05G186300	81	Glyma.05G186300	Glyma.05G186300	mixed_up_down	0.994871	2.77072e-11	1
	Glyma.02G097400	70	Glyma.02G097400	Glyma.02G097400	up	Glyma.05G197900	82	Glyma.05G197900	Glyma.05G197900	up	0.992986	1.32114e-10	1
	Glyma.02G097400	70	Glyma.02G097400	Glyma.02G097400	up	Glyma.06G006800	82	Glyma.06G006800	Glyma.06G006800	mixed_up_down	0.992565	1.76737e-10	1
	Glyma.02G097400	70	Glyma.02G097400	Glyma.02G097400	up	Glyma.06G282200	84	Glyma.06G282200	Glyma.06G282200	mixed_up_down	0.993832	6.96034e-11	1
	Glyma.02G097400	70	Glyma.02G097400	Glyma.02G097400	up	Glyma.06G282400	82	Glyma.06G282400	Glyma.06G282400	mixed_up_down	0.992812	1.49333e-10	1
	Glyma.02G097400	70	Glyma.02G097400	Glyma.02G097400	up	Glyma.06G282500	83	Glyma.06G282500	Glyma.06G282500	mixed_up_down	0.994577	3.65936e-11	1
	Glyma.02G097400	70	Glyma.02G097400	Glyma.02G097400	up	Glyma.06G282600	82	Glyma.06G282600	Glyma.06G282600	mixed_up_down	0.992833	1.47134e-10	1
	Glyma.02G097400	70	Glyma.02G097400	Glyma.02G097400	up	Glyma.06G282700	84	Glyma.06G282700	Glyma.06G282700	mixed_up_down	0.995518	1.41336e-11	1
	Glyma.02G097400	70	Glyma.02G097400	Glyma.02G097400	up	Glyma.06G282900	82	Glyma.06G282900	Glyma.06G282900	up	0.992925	1.3797e-10	1
	Glyma.02G097400	70	Glyma.02G097400	Glyma.02G097400	up	Glyma.06G283800	61	Glyma.06G283800	Glyma.06G283800	mixed_up_down	0.991867	2.76508e-10	1
	Glyma.02G097400	70	Glyma.02G097400	Glyma.02G097400	up	Glyma.06G306900	80	Glyma.06G306900	Glyma.06G306900	mixed_up_down	0.994756	3.09495e-11	1
	Glyma.02G097400	70	Glyma.02G097400	Glyma.02G097400	up	Glyma.08G009900	82	Glyma.08G009900	Glyma.08G009900	mixed_up_down	0.991578	3.29063e-10	1
	Glyma.02G097400	70	Glyma.02G097400	Glyma.02G097400	up	Glyma.08G155400	82	Glyma.08G155400	Glyma.08G155400	mixed_up_down	0.992925	1.3797e-10	1
	Glyma.02G097400	70	Glyma.02G097400	Glyma.02G097400	up	Glyma.08G155500	82	Glyma.08G155500	Glyma.08G155500	mixed_up_down	0.992925	1.3797e-10	1
	Glyma.02G097400	70	Glyma.02G097400	Glyma.02G097400	up	Glyma.08G155700	85	Glyma.08G155700	Glyma.08G155700	mixed_up_down	0.9949	2.69353e-11	1
	Glyma.02G097400	70	Glyma.02G097400	Glyma.02G097400	up	Glyma.08G232200	84	Glyma.08G232200	Glyma.08G232200	mixed_up_down	0.994229	4.99403e-11	1
	Glyma.02G097400	70	Glyma.02G097400	Glyma.02G097400	up	Glyma.08G328600	80	Glyma.08G328600	Glyma.08G328600	mixed_up_down	0.995206	1.97764e-11	1
	Glyma.02G097400	70	Glyma.02G097400	Glyma.02G097400	up	Glyma.08G342300	82	Glyma.08G342300	Glyma.08G342300	mixed_up_down	0.992925	1.3797e-10	1
	Glyma.02G097400	70	Glyma.02G097400	Glyma.02G097400	up	Glyma.09G087400	71	Glyma.09G087400	Glyma.09G087400	up	0.993741	7.48601e-11	1
	Glyma.02G097400	70	Glyma.02G097400	Glyma.02G097400	up	Glyma.09G221800	82	Glyma.09G221800	Glyma.09G221800	mixed_up_down	0.992634	1.68705e-10	1
	Glyma.02G097400	70	Glyma.02G097400	Glyma.02G097400	up	Glyma.10G017000	82	Glyma.10G017000	Glyma.10G017000	mixed_up_down	0.992925	1.3797e-10	1
	Glyma.02G097400	70	Glyma.02G097400	Glyma.02G097400	up	Glyma.10G056300	77	Glyma.10G056300	Glyma.10G056300	mixed_up_down	0.992443	1.91603e-10	1
	Glyma.02G097400	70	Glyma.02G097400	Glyma.02G097400	up	Glyma.10G296600	84	Glyma.10G296600	Glyma.10G296600	mixed_up_down	0.994601	3.58167e-11	1
	Glyma.02G097400	70	Glyma.02G097400	Glyma.02G097400	up	Glyma.11G120600	82	Glyma.11G120600	Glyma.11G120600	mixed_up_down	0.992798	1.50798e-10	1
	Glyma.02G097400	70	Glyma.02G097400	Glyma.02G097400	up	Glyma.11G179100	82	Glyma.11G179100	Glyma.11G179100	mixed_up_down	0.992112	2.37289e-10	1
	Glyma.02G097400	70	Glyma.02G097400	Glyma.02G097400	up	Glyma.11G238000	81	Glyma.11G238000	Glyma.11G238000	mixed_up_down	0.995678	1.17844e-11	1
	Glyma.02G097400	70	Glyma.02G097400	Glyma.02G097400	up	Glyma.12G122300	83	Glyma.12G122300	Glyma.12G122300	up	0.995313	1.76703e-11	1
	Glyma.02G097400	70	Glyma.02G097400	Glyma.02G097400	up	Glyma.12G124100	82	Glyma.12G124100	Glyma.12G124100	mixed_up_down	0.992925	1.3797e-10	1
	Glyma.02G097400	70	Glyma.02G097400	Glyma.02G097400	up	Glyma.12G124200	82	Glyma.12G124200	Glyma.12G124200	mixed_up_down	0.992925	1.3797e-10	1
	Glyma.02G097400	70	Glyma.02G097400	Glyma.02G097400	up	Glyma.12G124900	82	Glyma.12G124900	Glyma.12G124900	mixed_up_down	0.992925	1.3797e-10	1
	Glyma.02G097400	70	Glyma.02G097400	Glyma.02G097400	up	Glyma.13G091400	82	Glyma.13G091400	Glyma.13G091400	mixed_up_down	0.992925	1.3797e-10	1
	Glyma.02G097400	70	Glyma.02G097400	Glyma.02G097400	up	Glyma.13G165000	85	Glyma.13G165000	Glyma.13G165000	mixed_up_down	0.993658	7.99305e-11	1
	Glyma.02G097400	70	Glyma.02G097400	Glyma.02G097400	up	Glyma.13G218300	81	Glyma.13G218300	Glyma.13G218300	mixed_up_down	0.993555	8.66629e-11	1
	Glyma.02G097400	70	Glyma.02G097400	Glyma.02G097400	up	Glyma.13G240500	83	Glyma.13G240500	Glyma.13G240500	down	0.993183	1.14659e-10	1
	Glyma.02G097400	70	Glyma.02G097400	Glyma.02G097400	up	Glyma.13G319700	84	Glyma.13G319700	Glyma.13G319700	mixed_up_down	0.994238	4.95457e-11	1
	Glyma.02G097400	70	Glyma.02G097400	Glyma.02G097400	up	Glyma.14G014200	78	Glyma.14G014200	Glyma.14G014200	mixed_up_down	0.994999	2.44302e-11	1
	Glyma.02G097400	70	Glyma.02G097400	Glyma.02G097400	up	Glyma.15G066200	82	Glyma.15G066200	Glyma.15G066200	mixed_up_down	0.992925	1.3797e-10	1
	Glyma.02G097400	70	Glyma.02G097400	Glyma.02G097400	up	Glyma.15G140200	76	Glyma.15G140200	Glyma.15G140200	mixed_up_down	0.995171	2.05032e-11	1
	Glyma.02G097400	70	Glyma.02G097400	Glyma.02G097400	up	Glyma.15G238600	84	Glyma.15G238600	Glyma.15G238600	up	0.995238	1.91394e-11	1
	Glyma.02G097400	70	Glyma.02G097400	Glyma.02G097400	up	Glyma.16G043500	78	Glyma.16G043500	Glyma.16G043500	mixed_up_down	0.992086	2.41261e-10	1
	Glyma.02G097400	70	Glyma.02G097400	Glyma.02G097400	up	Glyma.16G079500	82	Glyma.16G079500	Glyma.16G079500	mixed_up_down	0.995651	1.21625e-11	1
	Glyma.02G097400	70	Glyma.02G097400	Glyma.02G097400	up	Glyma.17G027300	82	Glyma.17G027300	Glyma.17G027300	mixed_up_down	0.992428	1.93598e-10	1
	Glyma.02G097400	70	Glyma.02G097400	Glyma.02G097400	up	Glyma.17G106100	84	Glyma.17G106100	Glyma.17G106100	mixed_up_down	0.991052	4.45116e-10	1
	Glyma.02G097400	70	Glyma.02G097400	Glyma.02G097400	up	Glyma.17G139400	82	Glyma.17G139400	Glyma.17G139400	mixed_up_down	0.993268	1.07683e-10	1
	Glyma.02G097400	70	Glyma.02G097400	Glyma.02G097400	up	Glyma.17G157400	83	Glyma.17G157400	Glyma.17G157400	mixed_up_down	0.991908	2.69574e-10	1
	Glyma.02G097400	70	Glyma.02G097400	Glyma.02G097400	up	Glyma.17G252400	62	Glyma.17G252400	Glyma.17G252400	mixed_up_down	0.99142	3.60944e-10	1
	Glyma.02G097400	70	Glyma.02G097400	Glyma.02G097400	up	Glyma.18G019300	75	Glyma.18G019300	Glyma.18G019300	mixed_up_down	0.990042	7.58272e-10	1
	Glyma.02G097400	70	Glyma.02G097400	Glyma.02G097400	up	Glyma.18G054000	82	Glyma.18G054000	Glyma.18G054000	up	0.993071	1.24328e-10	1
	Glyma.02G097400	70	Glyma.02G097400	Glyma.02G097400	up	Glyma.18G215100	85	Glyma.18G215100	Glyma.18G215100	mixed_up_down	0.994371	4.40812e-11	1
	Glyma.02G097400	70	Glyma.02G097400	Glyma.02G097400	up	Glyma.18G225000	82	Glyma.18G225000	Glyma.18G225000	mixed_up_down	0.992954	1.35203e-10	1
	Glyma.02G097400	70	Glyma.02G097400	Glyma.02G097400	up	Glyma.19G019600	82	Glyma.19G019600	Glyma.19G019600	mixed_up_down	0.99497	2.5151e-11	1
	Glyma.02G097400	70	Glyma.02G097400	Glyma.02G097400	up	Glyma.19G161100	84	Glyma.19G161100	Glyma.19G161100	down	0.992062	2.44966e-10	1
	Glyma.02G097400	70	Glyma.02G097400	Glyma.02G097400	up	Glyma.20G034100	81	Glyma.20G034100	Glyma.20G034100	mixed_up_down	0.994153	5.32747e-11	1
	Glyma.02G097400	70	Glyma.02G097400	Glyma.02G097400	up	Glyma.20G246300	83	Glyma.20G246300	Glyma.20G246300	mixed_up_down	0.994525	3.84039e-11	1
	Glyma.02G097400	70	Glyma.02G097400	Glyma.02G097400	up	Glyma.20G247400	84	Glyma.20G247400	Glyma.20G247400	mixed_up_down	0.993838	6.9234e-11	1
	Glyma.02G097400	70	Glyma.02G097400	Glyma.02G097400	up	XLOC_029029	82	XLOC_029029	XLOC_029029	mixed_up_down	0.992925	1.3797e-10	1
92	Glyma.02G104600	1	Glyma.02G104600	Glyma.02G104600	mixed_up_down	Glyma.05G114000	2	Glyma.05G114000	Glyma.05G114000	mixed_up_down	0.993691	7.78833e-11	1
93	Glyma.02G109100	76	Glyma.02G109100	Glyma.02G109100	mixed_up_down	Glyma.02G142500	82	Glyma.02G142500	Glyma.02G142500	mixed_up_down	0.998104	1.92291e-13	1
	Glyma.02G109100	76	Glyma.02G109100	Glyma.02G109100	mixed_up_down	Glyma.02G299500	82	Glyma.02G299500	Glyma.02G299500	mixed_up_down	0.994847	2.83662e-11	1
	Glyma.02G109100	76	Glyma.02G109100	Glyma.02G109100	mixed_up_down	Glyma.03G049500	82	Glyma.03G049500	Glyma.03G049500	mixed_up_down	0.994736	3.15539e-11	1
	Glyma.02G109100	76	Glyma.02G109100	Glyma.02G109100	mixed_up_down	Glyma.03G094800	82	Glyma.03G094800	Glyma.03G094800	mixed_up_down	0.994847	2.83662e-11	1
	Glyma.02G109100	76	Glyma.02G109100	Glyma.02G109100	mixed_up_down	Glyma.03G158600	84	Glyma.03G158600	Glyma.03G158600	mixed_up_down	0.995799	1.0236e-11	1
	Glyma.02G109100	76	Glyma.02G109100	Glyma.02G109100	mixed_up_down	Glyma.03G158700	80	Glyma.03G158700	Glyma.03G158700	down	0.998525	5.4845e-14	1
	Glyma.02G109100	76	Glyma.02G109100	Glyma.02G109100	mixed_up_down	Glyma.03G210700	82	Glyma.03G210700	Glyma.03G210700	mixed_up_down	0.992586	1.7424e-10	1
	Glyma.02G109100	76	Glyma.02G109100	Glyma.02G109100	mixed_up_down	Glyma.04G006900	15	Glyma.04G006900	Glyma.04G006900	down	0.990208	6.97291e-10	1
	Glyma.02G109100	76	Glyma.02G109100	Glyma.02G109100	mixed_up_down	Glyma.04G046600	37	Glyma.04G046600	Glyma.04G046600	mixed_up_down	0.995185	2.02154e-11	1
	Glyma.02G109100	76	Glyma.02G109100	Glyma.02G109100	mixed_up_down	Glyma.04G094800	82	Glyma.04G094800	Glyma.04G094800	mixed_up_down	0.994847	2.83662e-11	1
	Glyma.02G109100	76	Glyma.02G109100	Glyma.02G109100	mixed_up_down	Glyma.05G037200	83	Glyma.05G037200	Glyma.05G037200	mixed_up_down	0.996551	3.82339e-12	1
	Glyma.02G109100	76	Glyma.02G109100	Glyma.02G109100	mixed_up_down	Glyma.05G056300	81	Glyma.05G056300	Glyma.05G056300	mixed_up_down	0.996231	5.9539e-12	1
	Glyma.02G109100	76	Glyma.02G109100	Glyma.02G109100	mixed_up_down	Glyma.05G109600	84	Glyma.05G109600	Glyma.05G109600	mixed_up_down	0.997301	1.12288e-12	1
	Glyma.02G109100	76	Glyma.02G109100	Glyma.02G109100	mixed_up_down	Glyma.05G126400	82	Glyma.05G126400	Glyma.05G126400	up	0.995575	1.32645e-11	1
	Glyma.02G109100	76	Glyma.02G109100	Glyma.02G109100	mixed_up_down	Glyma.05G186300	81	Glyma.05G186300	Glyma.05G186300	mixed_up_down	0.998851	1.57652e-14	1
	Glyma.02G109100	76	Glyma.02G109100	Glyma.02G109100	mixed_up_down	Glyma.05G197900	82	Glyma.05G197900	Glyma.05G197900	up	0.994031	5.90821e-11	1
	Glyma.02G109100	76	Glyma.02G109100	Glyma.02G109100	mixed_up_down	Glyma.06G006800	82	Glyma.06G006800	Glyma.06G006800	mixed_up_down	0.995781	1.04481e-11	1
	Glyma.02G109100	76	Glyma.02G109100	Glyma.02G109100	mixed_up_down	Glyma.06G124200	17	Glyma.06G124200	Glyma.06G124200	mixed_up_down	0.990007	7.71634e-10	1
	Glyma.02G109100	76	Glyma.02G109100	Glyma.02G109100	mixed_up_down	Glyma.06G282200	84	Glyma.06G282200	Glyma.06G282200	mixed_up_down	0.995033	2.36127e-11	1
	Glyma.02G109100	76	Glyma.02G109100	Glyma.02G109100	mixed_up_down	Glyma.06G282400	82	Glyma.06G282400	Glyma.06G282400	mixed_up_down	0.994662	3.38256e-11	1
	Glyma.02G109100	76	Glyma.02G109100	Glyma.02G109100	mixed_up_down	Glyma.06G282500	83	Glyma.06G282500	Glyma.06G282500	mixed_up_down	0.996362	4.99045e-12	1
	Glyma.02G109100	76	Glyma.02G109100	Glyma.02G109100	mixed_up_down	Glyma.06G282600	82	Glyma.06G282600	Glyma.06G282600	mixed_up_down	0.994778	3.03149e-11	1
	Glyma.02G109100	76	Glyma.02G109100	Glyma.02G109100	mixed_up_down	Glyma.06G282700	84	Glyma.06G282700	Glyma.06G282700	mixed_up_down	0.997158	1.45439e-12	1
	Glyma.02G109100	76	Glyma.02G109100	Glyma.02G109100	mixed_up_down	Glyma.06G282900	82	Glyma.06G282900	Glyma.06G282900	up	0.994847	2.83662e-11	1
	Glyma.02G109100	76	Glyma.02G109100	Glyma.02G109100	mixed_up_down	Glyma.06G306900	80	Glyma.06G306900	Glyma.06G306900	mixed_up_down	0.995078	2.25673e-11	1
	Glyma.02G109100	76	Glyma.02G109100	Glyma.02G109100	mixed_up_down	Glyma.08G009900	82	Glyma.08G009900	Glyma.08G009900	mixed_up_down	0.998887	1.33227e-14	1
	Glyma.02G109100	76	Glyma.02G109100	Glyma.02G109100	mixed_up_down	Glyma.08G155400	82	Glyma.08G155400	Glyma.08G155400	mixed_up_down	0.994847	2.83662e-11	1
	Glyma.02G109100	76	Glyma.02G109100	Glyma.02G109100	mixed_up_down	Glyma.08G155500	82	Glyma.08G155500	Glyma.08G155500	mixed_up_down	0.994847	2.83662e-11	1
	Glyma.02G109100	76	Glyma.02G109100	Glyma.02G109100	mixed_up_down	Glyma.08G155700	85	Glyma.08G155700	Glyma.08G155700	mixed_up_down	0.997521	7.34079e-13	1
	Glyma.02G109100	76	Glyma.02G109100	Glyma.02G109100	mixed_up_down	Glyma.08G232100	28	Glyma.08G232100	Glyma.08G232100	mixed_up_down	0.992209	2.23135e-10	1
	Glyma.02G109100	76	Glyma.02G109100	Glyma.02G109100	mixed_up_down	Glyma.08G232200	84	Glyma.08G232200	Glyma.08G232200	mixed_up_down	0.995966	8.35576e-12	1
	Glyma.02G109100	76	Glyma.02G109100	Glyma.02G109100	mixed_up_down	Glyma.08G328600	80	Glyma.08G328600	Glyma.08G328600	mixed_up_down	0.997353	1.0183e-12	1
	Glyma.02G109100	76	Glyma.02G109100	Glyma.02G109100	mixed_up_down	Glyma.08G342300	82	Glyma.08G342300	Glyma.08G342300	mixed_up_down	0.994847	2.83662e-11	1
	Glyma.02G109100	76	Glyma.02G109100	Glyma.02G109100	mixed_up_down	Glyma.09G221800	82	Glyma.09G221800	Glyma.09G221800	mixed_up_down	0.994644	3.43876e-11	1
	Glyma.02G109100	76	Glyma.02G109100	Glyma.02G109100	mixed_up_down	Glyma.10G017000	82	Glyma.10G017000	Glyma.10G017000	mixed_up_down	0.994847	2.83662e-11	1
	Glyma.02G109100	76	Glyma.02G109100	Glyma.02G109100	mixed_up_down	Glyma.10G056000	37	Glyma.10G056000	Glyma.10G056000	mixed_up_down	0.997279	1.17018e-12	1
	Glyma.02G109100	76	Glyma.02G109100	Glyma.02G109100	mixed_up_down	Glyma.10G056300	77	Glyma.10G056300	Glyma.10G056300	mixed_up_down	0.999513	2.22045e-16	1
	Glyma.02G109100	76	Glyma.02G109100	Glyma.02G109100	mixed_up_down	Glyma.10G296600	84	Glyma.10G296600	Glyma.10G296600	mixed_up_down	0.99545	1.52491e-11	1
	Glyma.02G109100	76	Glyma.02G109100	Glyma.02G109100	mixed_up_down	Glyma.11G120600	82	Glyma.11G120600	Glyma.11G120600	mixed_up_down	0.994063	5.75384e-11	1
	Glyma.02G109100	76	Glyma.02G109100	Glyma.02G109100	mixed_up_down	Glyma.11G179100	82	Glyma.11G179100	Glyma.11G179100	mixed_up_down	0.99345	9.39258e-11	1
	Glyma.02G109100	76	Glyma.02G109100	Glyma.02G109100	mixed_up_down	Glyma.11G238000	81	Glyma.11G238000	Glyma.11G238000	mixed_up_down	0.997254	1.22324e-12	1
	Glyma.02G109100	76	Glyma.02G109100	Glyma.02G109100	mixed_up_down	Glyma.12G122300	83	Glyma.12G122300	Glyma.12G122300	up	0.995994	8.07177e-12	1
	Glyma.02G109100	76	Glyma.02G109100	Glyma.02G109100	mixed_up_down	Glyma.12G124100	82	Glyma.12G124100	Glyma.12G124100	mixed_up_down	0.994847	2.83662e-11	1
	Glyma.02G109100	76	Glyma.02G109100	Glyma.02G109100	mixed_up_down	Glyma.12G124200	82	Glyma.12G124200	Glyma.12G124200	mixed_up_down	0.994847	2.83662e-11	1
	Glyma.02G109100	76	Glyma.02G109100	Glyma.02G109100	mixed_up_down	Glyma.12G124900	82	Glyma.12G124900	Glyma.12G124900	mixed_up_down	0.994847	2.83662e-11	1
	Glyma.02G109100	76	Glyma.02G109100	Glyma.02G109100	mixed_up_down	Glyma.13G091400	82	Glyma.13G091400	Glyma.13G091400	mixed_up_down	0.994847	2.83662e-11	1
	Glyma.02G109100	76	Glyma.02G109100	Glyma.02G109100	mixed_up_down	Glyma.13G165000	85	Glyma.13G165000	Glyma.13G165000	mixed_up_down	0.998518	5.63993e-14	1
	Glyma.02G109100	76	Glyma.02G109100	Glyma.02G109100	mixed_up_down	Glyma.13G218300	81	Glyma.13G218300	Glyma.13G218300	mixed_up_down	0.99429	4.73634e-11	1
	Glyma.02G109100	76	Glyma.02G109100	Glyma.02G109100	mixed_up_down	Glyma.13G240500	83	Glyma.13G240500	Glyma.13G240500	down	0.996564	3.75078e-12	1
	Glyma.02G109100	76	Glyma.02G109100	Glyma.02G109100	mixed_up_down	Glyma.13G319700	84	Glyma.13G319700	Glyma.13G319700	mixed_up_down	0.996056	7.46292e-12	1
	Glyma.02G109100	76	Glyma.02G109100	Glyma.02G109100	mixed_up_down	Glyma.14G014200	78	Glyma.14G014200	Glyma.14G014200	mixed_up_down	0.995939	8.63665e-12	1
	Glyma.02G109100	76	Glyma.02G109100	Glyma.02G109100	mixed_up_down	Glyma.15G066200	82	Glyma.15G066200	Glyma.15G066200	mixed_up_down	0.994847	2.83662e-11	1
	Glyma.02G109100	76	Glyma.02G109100	Glyma.02G109100	mixed_up_down	Glyma.15G140200	76	Glyma.15G140200	Glyma.15G140200	mixed_up_down	0.996383	4.84923e-12	1
	Glyma.02G109100	76	Glyma.02G109100	Glyma.02G109100	mixed_up_down	Glyma.15G238600	84	Glyma.15G238600	Glyma.15G238600	up	0.996935	2.11875e-12	1
	Glyma.02G109100	76	Glyma.02G109100	Glyma.02G109100	mixed_up_down	Glyma.16G043500	78	Glyma.16G043500	Glyma.16G043500	mixed_up_down	0.991675	3.10536e-10	1
	Glyma.02G109100	76	Glyma.02G109100	Glyma.02G109100	mixed_up_down	Glyma.16G079500	82	Glyma.16G079500	Glyma.16G079500	mixed_up_down	0.997109	1.58229e-12	1
	Glyma.02G109100	76	Glyma.02G109100	Glyma.02G109100	mixed_up_down	Glyma.16G129600	76	Glyma.16G129600	Glyma.16G129600	mixed_up_down	0.997388	9.5346e-13	1
	Glyma.02G109100	76	Glyma.02G109100	Glyma.02G109100	mixed_up_down	Glyma.17G027300	82	Glyma.17G027300	Glyma.17G027300	mixed_up_down	0.99449	3.96287e-11	1
	Glyma.02G109100	76	Glyma.02G109100	Glyma.02G109100	mixed_up_down	Glyma.17G106100	84	Glyma.17G106100	Glyma.17G106100	mixed_up_down	0.998347	9.68114e-14	1
	Glyma.02G109100	76	Glyma.02G109100	Glyma.02G109100	mixed_up_down	Glyma.17G139400	82	Glyma.17G139400	Glyma.17G139400	mixed_up_down	0.995169	2.05471e-11	1
	Glyma.02G109100	76	Glyma.02G109100	Glyma.02G109100	mixed_up_down	Glyma.17G157400	83	Glyma.17G157400	Glyma.17G157400	mixed_up_down	0.996352	5.05374e-12	1
	Glyma.02G109100	76	Glyma.02G109100	Glyma.02G109100	mixed_up_down	Glyma.18G019300	75	Glyma.18G019300	Glyma.18G019300	mixed_up_down	0.998446	7.10543e-14	1
	Glyma.02G109100	76	Glyma.02G109100	Glyma.02G109100	mixed_up_down	Glyma.18G054000	82	Glyma.18G054000	Glyma.18G054000	up	0.994499	3.92983e-11	1
	Glyma.02G109100	76	Glyma.02G109100	Glyma.02G109100	mixed_up_down	Glyma.18G215100	85	Glyma.18G215100	Glyma.18G215100	mixed_up_down	0.996856	2.40741e-12	1
	Glyma.02G109100	76	Glyma.02G109100	Glyma.02G109100	mixed_up_down	Glyma.18G225000	82	Glyma.18G225000	Glyma.18G225000	mixed_up_down	0.994833	2.87654e-11	1
	Glyma.02G109100	76	Glyma.02G109100	Glyma.02G109100	mixed_up_down	Glyma.19G019600	82	Glyma.19G019600	Glyma.19G019600	mixed_up_down	0.995241	1.90621e-11	1
	Glyma.02G109100	76	Glyma.02G109100	Glyma.02G109100	mixed_up_down	Glyma.19G161100	84	Glyma.19G161100	Glyma.19G161100	down	0.998591	4.35207e-14	1
	Glyma.02G109100	76	Glyma.02G109100	Glyma.02G109100	mixed_up_down	Glyma.20G034100	81	Glyma.20G034100	Glyma.20G034100	mixed_up_down	0.994391	4.33078e-11	1
	Glyma.02G109100	76	Glyma.02G109100	Glyma.02G109100	mixed_up_down	Glyma.20G246300	83	Glyma.20G246300	Glyma.20G246300	mixed_up_down	0.99633	5.21294e-12	1
	Glyma.02G109100	76	Glyma.02G109100	Glyma.02G109100	mixed_up_down	Glyma.20G247400	84	Glyma.20G247400	Glyma.20G247400	mixed_up_down	0.994931	2.61329e-11	1
	Glyma.02G109100	76	Glyma.02G109100	Glyma.02G109100	mixed_up_down	XLOC_001320	76	XLOC_001320	XLOC_001320	down	0.995375	1.65288e-11	1
	Glyma.02G109100	76	Glyma.02G109100	Glyma.02G109100	mixed_up_down	XLOC_029029	82	XLOC_029029	XLOC_029029	mixed_up_down	0.994847	2.83662e-11	1
	Glyma.02G109100	76	Glyma.02G109100	Glyma.02G109100	mixed_up_down	XLOC_040788	37	XLOC_040788	XLOC_040788	mixed_up_down	0.997034	1.79723e-12	1
94	Glyma.02G113800	15	Glyma.02G113800	Glyma.02G113800	mixed_up_down	Glyma.04G167400	15	Glyma.04G167400	Glyma.04G167400	mixed_up_down	0.991238	4.0072e-10	1
	Glyma.02G113800	15	Glyma.02G113800	Glyma.02G113800	mixed_up_down	Glyma.06G174200	7	Glyma.06G174200	Glyma.06G174200	mixed_up_down	0.990726	5.31961e-10	1
	Glyma.02G113800	15	Glyma.02G113800	Glyma.02G113800	mixed_up_down	Glyma.08G286800	21	Glyma.08G286800	Glyma.08G286800	mixed_up_down	0.996245	5.84066e-12	1
	Glyma.02G113800	15	Glyma.02G113800	Glyma.02G113800	mixed_up_down	Glyma.09G118900	10	Glyma.09G118900	Glyma.09G118900	mixed_up_down	0.997901	3.19744e-13	1
	Glyma.02G113800	15	Glyma.02G113800	Glyma.02G113800	mixed_up_down	Glyma.10G155400	7	Glyma.10G155400	Glyma.10G155400	mixed_up_down	0.992921	1.38332e-10	1
	Glyma.02G113800	15	Glyma.02G113800	Glyma.02G113800	mixed_up_down	Glyma.11G006500	9	Glyma.11G006500	Glyma.11G006500	mixed_up_down	0.995494	1.4523e-11	1
	Glyma.02G113800	15	Glyma.02G113800	Glyma.02G113800	mixed_up_down	Glyma.11G014300	4	Glyma.11G014300	Glyma.11G014300	mixed_up_down	0.99304	1.27118e-10	1
	Glyma.02G113800	15	Glyma.02G113800	Glyma.02G113800	mixed_up_down	Glyma.11G100800	11	Glyma.11G100800	Glyma.11G100800	up	0.994316	4.62965e-11	1
	Glyma.02G113800	15	Glyma.02G113800	Glyma.02G113800	mixed_up_down	Glyma.11G121100	15	Glyma.11G121100	Glyma.11G121100	mixed_up_down	0.994336	4.54587e-11	1
	Glyma.02G113800	15	Glyma.02G113800	Glyma.02G113800	mixed_up_down	Glyma.14G177200	21	Glyma.14G177200	Glyma.14G177200	mixed_up_down	0.991026	4.51463e-10	1
	Glyma.02G113800	15	Glyma.02G113800	Glyma.02G113800	mixed_up_down	Glyma.14G223600	20	Glyma.14G223600	Glyma.14G223600	mixed_up_down	0.99544	1.54019e-11	1
	Glyma.02G113800	15	Glyma.02G113800	Glyma.02G113800	mixed_up_down	Glyma.15G047000	17	Glyma.15G047000	Glyma.15G047000	up	0.990326	6.56614e-10	1
	Glyma.02G113800	15	Glyma.02G113800	Glyma.02G113800	mixed_up_down	Glyma.15G197500	9	Glyma.15G197500	Glyma.15G197500	mixed_up_down	0.990975	4.64405e-10	1
	Glyma.02G113800	15	Glyma.02G113800	Glyma.02G113800	mixed_up_down	Glyma.19G123400	7	Glyma.19G123400	Glyma.19G123400	mixed_up_down	0.991587	3.27227e-10	1
	Glyma.02G113800	15	Glyma.02G113800	Glyma.02G113800	mixed_up_down	Glyma.19G244500	19	Glyma.19G244500	Glyma.19G244500	mixed_up_down	0.99202	2.51514e-10	1
95	Glyma.02G116500	7	Glyma.02G116500	Glyma.02G116500	up	Glyma.03G206100	7	Glyma.03G206100	Glyma.03G206100	mixed_up_down	0.995725	1.11589e-11	1
	Glyma.02G116500	7	Glyma.02G116500	Glyma.02G116500	up	Glyma.10G150100	7	Glyma.10G150100	Glyma.10G150100	mixed_up_down	0.992024	2.5087e-10	1
	Glyma.02G116500	7	Glyma.02G116500	Glyma.02G116500	up	Glyma.11G173700	7	Glyma.11G173700	Glyma.11G173700	mixed_up_down	0.995695	1.1561e-11	1
	Glyma.02G116500	7	Glyma.02G116500	Glyma.02G116500	up	Glyma.16G154700	9	Glyma.16G154700	Glyma.16G154700	mixed_up_down	0.991898	2.71171e-10	1
	Glyma.02G116500	7	Glyma.02G116500	Glyma.02G116500	up	Glyma.17G176200	9	Glyma.17G176200	Glyma.17G176200	mixed_up_down	0.991949	2.62899e-10	1
	Glyma.02G116500	7	Glyma.02G116500	Glyma.02G116500	up	Glyma.20G224000	7	Glyma.20G224000	Glyma.20G224000	mixed_up_down	0.991247	3.98641e-10	1
	Glyma.02G116500	7	Glyma.02G116500	Glyma.02G116500	up	XLOC_019777	3	XLOC_019777	XLOC_019777	mixed_up_down	0.99579	1.03442e-11	1
96	Glyma.02G119600	9	Glyma.02G119600	Glyma.02G119600	mixed_up_down	Glyma.03G081900	4	Glyma.03G081900	Glyma.03G081900	mixed_up_down	0.996605	3.53229e-12	1
	Glyma.02G119600	9	Glyma.02G119600	Glyma.02G119600	mixed_up_down	Glyma.03G132700	8	Glyma.03G132700	Glyma.03G132700	down	0.990815	5.06893e-10	1
	Glyma.02G119600	9	Glyma.02G119600	Glyma.02G119600	mixed_up_down	Glyma.05G147200	12	Glyma.05G147200	Glyma.05G147200	mixed_up_down	0.997554	6.87006e-13	1
	Glyma.02G119600	9	Glyma.02G119600	Glyma.02G119600	mixed_up_down	Glyma.05G152500	17	Glyma.05G152500	Glyma.05G152500	mixed_up_down	0.995275	1.84095e-11	1
	Glyma.02G119600	9	Glyma.02G119600	Glyma.02G119600	mixed_up_down	Glyma.10G168100	10	Glyma.10G168100	Glyma.10G168100	mixed_up_down	0.996434	4.51195e-12	1
	Glyma.02G119600	9	Glyma.02G119600	Glyma.02G119600	mixed_up_down	Glyma.13G052100	12	Glyma.13G052100	Glyma.13G052100	mixed_up_down	0.991946	2.63281e-10	1
	Glyma.02G119600	9	Glyma.02G119600	Glyma.02G119600	mixed_up_down	Glyma.16G027200	11	Glyma.16G027200	Glyma.16G027200	mixed_up_down	0.997909	3.13527e-13	1
	Glyma.02G119600	9	Glyma.02G119600	Glyma.02G119600	mixed_up_down	Glyma.19G109600	13	Glyma.19G109600	Glyma.19G109600	mixed_up_down	0.992234	2.19628e-10	1
	Glyma.02G119600	9	Glyma.02G119600	Glyma.02G119600	mixed_up_down	XLOC_014230	11	XLOC_014230	XLOC_014230	mixed_up_down	0.991782	2.91086e-10	1
97	Glyma.02G126300	22	Glyma.02G126300	Glyma.02G126300	mixed_up_down	Glyma.02G204700	15	Glyma.02G204700	Glyma.02G204700	mixed_up_down	0.992965	1.34141e-10	1
	Glyma.02G126300	22	Glyma.02G126300	Glyma.02G126300	mixed_up_down	Glyma.04G233500	20	Glyma.04G233500	Glyma.04G233500	mixed_up_down	0.992014	2.52478e-10	1
	Glyma.02G126300	22	Glyma.02G126300	Glyma.02G126300	mixed_up_down	Glyma.05G129100	14	Glyma.05G129100	Glyma.05G129100	mixed_up_down	0.99107	4.40667e-10	1
	Glyma.02G126300	22	Glyma.02G126300	Glyma.02G126300	mixed_up_down	Glyma.06G195200	13	Glyma.06G195200	Glyma.06G195200	mixed_up_down	0.990924	4.7757e-10	1
	Glyma.02G126300	22	Glyma.02G126300	Glyma.02G126300	mixed_up_down	Glyma.06G235100	19	Glyma.06G235100	Glyma.06G235100	mixed_up_down	0.997692	5.13367e-13	1
	Glyma.02G126300	22	Glyma.02G126300	Glyma.02G126300	mixed_up_down	Glyma.07G029900	18	Glyma.07G029900	Glyma.07G029900	mixed_up_down	0.990503	5.9868e-10	1
	Glyma.02G126300	22	Glyma.02G126300	Glyma.02G126300	mixed_up_down	Glyma.07G092700	20	Glyma.07G092700	Glyma.07G092700	mixed_up_down	0.996826	2.52465e-12	1
	Glyma.02G126300	22	Glyma.02G126300	Glyma.02G126300	mixed_up_down	Glyma.08G247300	21	Glyma.08G247300	Glyma.08G247300	mixed_up_down	0.999061	5.77316e-15	1
	Glyma.02G126300	22	Glyma.02G126300	Glyma.02G126300	mixed_up_down	Glyma.08G281300	14	Glyma.08G281300	Glyma.08G281300	mixed_up_down	0.99295	1.35556e-10	1
	Glyma.02G126300	22	Glyma.02G126300	Glyma.02G126300	mixed_up_down	Glyma.10G074900	16	Glyma.10G074900	Glyma.10G074900	mixed_up_down	0.99096	4.68404e-10	1
	Glyma.02G126300	22	Glyma.02G126300	Glyma.02G126300	mixed_up_down	Glyma.12G029100	14	Glyma.12G029100	Glyma.12G029100	mixed_up_down	0.994955	2.55289e-11	1
	Glyma.02G126300	22	Glyma.02G126300	Glyma.02G126300	mixed_up_down	Glyma.13G068600	17	Glyma.13G068600	Glyma.13G068600	mixed_up_down	0.996748	2.84794e-12	1
	Glyma.02G126300	22	Glyma.02G126300	Glyma.02G126300	mixed_up_down	Glyma.13G088900	16	Glyma.13G088900	Glyma.13G088900	mixed_up_down	0.992096	2.39703e-10	1
	Glyma.02G126300	22	Glyma.02G126300	Glyma.02G126300	mixed_up_down	Glyma.13G129500	20	Glyma.13G129500	Glyma.13G129500	mixed_up_down	0.99251	1.83322e-10	1
	Glyma.02G126300	22	Glyma.02G126300	Glyma.02G126300	mixed_up_down	Glyma.13G365400	17	Glyma.13G365400	Glyma.13G365400	mixed_up_down	0.990527	5.91226e-10	1
	Glyma.02G126300	22	Glyma.02G126300	Glyma.02G126300	mixed_up_down	Glyma.14G110000	22	Glyma.14G110000	Glyma.14G110000	mixed_up_down	0.99878	2.13163e-14	1
	Glyma.02G126300	22	Glyma.02G126300	Glyma.02G126300	mixed_up_down	Glyma.14G197900	20	Glyma.14G197900	Glyma.14G197900	mixed_up_down	0.997556	6.83453e-13	1
	Glyma.02G126300	22	Glyma.02G126300	Glyma.02G126300	mixed_up_down	Glyma.16G153000	21	Glyma.16G153000	Glyma.16G153000	mixed_up_down	0.998055	2.1827e-13	1
	Glyma.02G126300	22	Glyma.02G126300	Glyma.02G126300	mixed_up_down	Glyma.17G174500	18	Glyma.17G174500	Glyma.17G174500	mixed_up_down	0.991307	3.85334e-10	1
	Glyma.02G126300	22	Glyma.02G126300	Glyma.02G126300	mixed_up_down	Glyma.20G109800	20	Glyma.20G109800	Glyma.20G109800	mixed_up_down	0.996446	4.44089e-12	1
	Glyma.02G126300	22	Glyma.02G126300	Glyma.02G126300	mixed_up_down	Glyma.20G119000	17	Glyma.20G119000	Glyma.20G119000	mixed_up_down	0.995389	1.62856e-11	1
98	Glyma.02G128400	1	Glyma.02G128400	Glyma.02G128400	down	Glyma.13G125800	7	Glyma.13G125800	Glyma.13G125800	down	0.99063	5.59886e-10	1
99	Glyma.02G131600	2	Glyma.02G131600	Glyma.02G131600	mixed_up_down	Glyma.02G184000	8	Glyma.02G184000	Glyma.02G184000	mixed_up_down	0.991306	3.85556e-10	1
	Glyma.02G131600	2	Glyma.02G131600	Glyma.02G131600	mixed_up_down	Glyma.15G126100	11	Glyma.15G126100	Glyma.15G126100	mixed_up_down	0.992817	1.48789e-10	1
100	Glyma.02G133900	2	Glyma.02G133900	Glyma.02G133900	mixed_up_down	Glyma.17G067300	1	Glyma.17G067300	Glyma.17G067300	mixed_up_down	0.991665	3.12401e-10	1
	Glyma.02G133900	2	Glyma.02G133900	Glyma.02G133900	mixed_up_down	Glyma.18G234300	1	Glyma.18G234300	Glyma.18G234300	mixed_up_down	0.991954	2.61999e-10	1
101	Glyma.02G135200	1	Glyma.02G135200	Glyma.02G135200	mixed_up_down	Glyma.13G213300	1	Glyma.13G213300	Glyma.13G213300	up	0.993051	1.26157e-10	1
102	Glyma.02G141700	12	Glyma.02G141700	Glyma.02G141700	mixed_up_down	Glyma.06G047700	6	Glyma.06G047700	Glyma.06G047700	mixed_up_down	0.992138	2.33466e-10	1
	Glyma.02G141700	12	Glyma.02G141700	Glyma.02G141700	mixed_up_down	Glyma.07G029900	18	Glyma.07G029900	Glyma.07G029900	mixed_up_down	0.992524	1.81638e-10	1
	Glyma.02G141700	12	Glyma.02G141700	Glyma.02G141700	mixed_up_down	Glyma.07G076000	10	Glyma.07G076000	Glyma.07G076000	mixed_up_down	0.992234	2.19542e-10	1
	Glyma.02G141700	12	Glyma.02G141700	Glyma.02G141700	mixed_up_down	Glyma.08G328500	13	Glyma.08G328500	Glyma.08G328500	mixed_up_down	0.992487	1.86184e-10	1
	Glyma.02G141700	12	Glyma.02G141700	Glyma.02G141700	mixed_up_down	Glyma.10G066600	16	Glyma.10G066600	Glyma.10G066600	mixed_up_down	0.995246	1.89631e-11	1
	Glyma.02G141700	12	Glyma.02G141700	Glyma.02G141700	mixed_up_down	Glyma.11G049800	13	Glyma.11G049800	Glyma.11G049800	mixed_up_down	0.998046	2.23377e-13	1
	Glyma.02G141700	12	Glyma.02G141700	Glyma.02G141700	mixed_up_down	Glyma.11G175800	16	Glyma.11G175800	Glyma.11G175800	mixed_up_down	0.990679	5.45395e-10	1
	Glyma.02G141700	12	Glyma.02G141700	Glyma.02G141700	mixed_up_down	Glyma.13G129500	20	Glyma.13G129500	Glyma.13G129500	mixed_up_down	0.991744	2.97942e-10	1
	Glyma.02G141700	12	Glyma.02G141700	Glyma.02G141700	mixed_up_down	Glyma.13G166900	9	Glyma.13G166900	Glyma.13G166900	mixed_up_down	0.994196	5.13847e-11	1
	Glyma.02G141700	12	Glyma.02G141700	Glyma.02G141700	mixed_up_down	Glyma.13G365400	17	Glyma.13G365400	Glyma.13G365400	mixed_up_down	0.995331	1.73297e-11	1
	Glyma.02G141700	12	Glyma.02G141700	Glyma.02G141700	mixed_up_down	Glyma.14G003400	12	Glyma.14G003400	Glyma.14G003400	down	0.997193	1.36691e-12	1
	Glyma.02G141700	12	Glyma.02G141700	Glyma.02G141700	mixed_up_down	Glyma.17G113400	9	Glyma.17G113400	Glyma.17G113400	mixed_up_down	0.99081	5.08429e-10	1
103	Glyma.02G142400	22	Glyma.02G142400	Glyma.02G142400	mixed_up_down	Glyma.02G142500	82	Glyma.02G142500	Glyma.02G142500	mixed_up_down	0.990204	6.98785e-10	1
	Glyma.02G142400	22	Glyma.02G142400	Glyma.02G142400	mixed_up_down	Glyma.02G249000	22	Glyma.02G249000	Glyma.02G249000	mixed_up_down	0.996021	7.80198e-12	1
	Glyma.02G142400	22	Glyma.02G142400	Glyma.02G142400	mixed_up_down	Glyma.06G067000	18	Glyma.06G067000	Glyma.06G067000	mixed_up_down	0.993829	6.97593e-11	1
	Glyma.02G142400	22	Glyma.02G142400	Glyma.02G142400	mixed_up_down	Glyma.08G232100	28	Glyma.08G232100	Glyma.08G232100	mixed_up_down	0.990494	6.01642e-10	1
	Glyma.02G142400	22	Glyma.02G142400	Glyma.02G142400	mixed_up_down	Glyma.10G031900	15	Glyma.10G031900	Glyma.10G031900	down	0.996301	5.42189e-12	1
	Glyma.02G142400	22	Glyma.02G142400	Glyma.02G142400	mixed_up_down	Glyma.10G056000	37	Glyma.10G056000	Glyma.10G056000	mixed_up_down	0.992438	1.92263e-10	1
	Glyma.02G142400	22	Glyma.02G142400	Glyma.02G142400	mixed_up_down	Glyma.12G035200	18	Glyma.12G035200	Glyma.12G035200	mixed_up_down	0.990992	4.60028e-10	1
	Glyma.02G142400	22	Glyma.02G142400	Glyma.02G142400	mixed_up_down	Glyma.12G103200	9	Glyma.12G103200	Glyma.12G103200	mixed_up_down	0.992181	2.2723e-10	1
	Glyma.02G142400	22	Glyma.02G142400	Glyma.02G142400	mixed_up_down	Glyma.14G050900	18	Glyma.14G050900	Glyma.14G050900	mixed_up_down	0.991382	3.68932e-10	1
	Glyma.02G142400	22	Glyma.02G142400	Glyma.02G142400	mixed_up_down	Glyma.15G258100	5	Glyma.15G258100	Glyma.15G258100	up	0.99232	2.07667e-10	1
	Glyma.02G142400	22	Glyma.02G142400	Glyma.02G142400	mixed_up_down	Glyma.17G115300	19	Glyma.17G115300	Glyma.17G115300	mixed_up_down	0.998604	4.17444e-14	1
	Glyma.02G142400	22	Glyma.02G142400	Glyma.02G142400	mixed_up_down	Glyma.18G078200	17	Glyma.18G078200	Glyma.18G078200	mixed_up_down	0.990531	5.89983e-10	1
	Glyma.02G142400	22	Glyma.02G142400	Glyma.02G142400	mixed_up_down	Glyma.19G114100	17	Glyma.19G114100	Glyma.19G114100	mixed_up_down	0.996875	2.33569e-12	1
	Glyma.02G142400	22	Glyma.02G142400	Glyma.02G142400	mixed_up_down	Glyma.19G239100	17	Glyma.19G239100	Glyma.19G239100	mixed_up_down	0.997858	3.53717e-13	1
	Glyma.02G142400	22	Glyma.02G142400	Glyma.02G142400	mixed_up_down	XLOC_009174	19	XLOC_009174	XLOC_009174	mixed_up_down	0.998313	1.07025e-13	1
	Glyma.02G142400	22	Glyma.02G142400	Glyma.02G142400	mixed_up_down	XLOC_009184	20	XLOC_009184	XLOC_009184	mixed_up_down	0.991886	2.73172e-10	1
	Glyma.02G142400	22	Glyma.02G142400	Glyma.02G142400	mixed_up_down	XLOC_019806	22	XLOC_019806	XLOC_019806	down	0.994507	3.90097e-11	1
	Glyma.02G142400	22	Glyma.02G142400	Glyma.02G142400	mixed_up_down	XLOC_032287	20	XLOC_032287	XLOC_032287	down	0.992873	1.43073e-10	1
	Glyma.02G142400	22	Glyma.02G142400	Glyma.02G142400	mixed_up_down	XLOC_032498	18	XLOC_032498	XLOC_032498	mixed_up_down	0.992998	1.31003e-10	1
	Glyma.02G142400	22	Glyma.02G142400	Glyma.02G142400	mixed_up_down	XLOC_036385	18	XLOC_036385	XLOC_036385	mixed_up_down	0.99171	3.04173e-10	1
	Glyma.02G142400	22	Glyma.02G142400	Glyma.02G142400	mixed_up_down	XLOC_040788	37	XLOC_040788	XLOC_040788	mixed_up_down	0.995749	1.08575e-11	1
104	Glyma.02G142500	82	Glyma.02G142500	Glyma.02G142500	mixed_up_down	Glyma.02G258600	4	Glyma.02G258600	Glyma.02G258600	mixed_up_down	0.992531	1.80826e-10	1
	Glyma.02G142500	82	Glyma.02G142500	Glyma.02G142500	mixed_up_down	Glyma.02G299500	82	Glyma.02G299500	Glyma.02G299500	mixed_up_down	0.993393	9.80864e-11	1
	Glyma.02G142500	82	Glyma.02G142500	Glyma.02G142500	mixed_up_down	Glyma.03G049500	82	Glyma.03G049500	Glyma.03G049500	mixed_up_down	0.993194	1.13687e-10	1
	Glyma.02G142500	82	Glyma.02G142500	Glyma.02G142500	mixed_up_down	Glyma.03G094800	82	Glyma.03G094800	Glyma.03G094800	mixed_up_down	0.993393	9.80864e-11	1
	Glyma.02G142500	82	Glyma.02G142500	Glyma.02G142500	mixed_up_down	Glyma.03G158600	84	Glyma.03G158600	Glyma.03G158600	mixed_up_down	0.99396	6.26446e-11	1
	Glyma.02G142500	82	Glyma.02G142500	Glyma.02G142500	mixed_up_down	Glyma.03G158700	80	Glyma.03G158700	Glyma.03G158700	down	0.998977	8.88178e-15	1
	Glyma.02G142500	82	Glyma.02G142500	Glyma.02G142500	mixed_up_down	Glyma.03G210700	82	Glyma.03G210700	Glyma.03G210700	mixed_up_down	0.990732	5.30182e-10	1
	Glyma.02G142500	82	Glyma.02G142500	Glyma.02G142500	mixed_up_down	Glyma.04G006900	15	Glyma.04G006900	Glyma.04G006900	down	0.992331	2.06228e-10	1
	Glyma.02G142500	82	Glyma.02G142500	Glyma.02G142500	mixed_up_down	Glyma.04G046600	37	Glyma.04G046600	Glyma.04G046600	mixed_up_down	0.990768	5.20149e-10	1
	Glyma.02G142500	82	Glyma.02G142500	Glyma.02G142500	mixed_up_down	Glyma.04G094800	82	Glyma.04G094800	Glyma.04G094800	mixed_up_down	0.993393	9.80864e-11	1
	Glyma.02G142500	82	Glyma.02G142500	Glyma.02G142500	mixed_up_down	Glyma.05G037200	83	Glyma.05G037200	Glyma.05G037200	mixed_up_down	0.996183	6.33715e-12	1
	Glyma.02G142500	82	Glyma.02G142500	Glyma.02G142500	mixed_up_down	Glyma.05G056300	81	Glyma.05G056300	Glyma.05G056300	mixed_up_down	0.993691	7.78932e-11	1
	Glyma.02G142500	82	Glyma.02G142500	Glyma.02G142500	mixed_up_down	Glyma.05G109600	84	Glyma.05G109600	Glyma.05G109600	mixed_up_down	0.997009	1.87583e-12	1
	Glyma.02G142500	82	Glyma.02G142500	Glyma.02G142500	mixed_up_down	Glyma.05G126400	82	Glyma.05G126400	Glyma.05G126400	up	0.994555	3.73537e-11	1
	Glyma.02G142500	82	Glyma.02G142500	Glyma.02G142500	mixed_up_down	Glyma.05G186300	81	Glyma.05G186300	Glyma.05G186300	mixed_up_down	0.996633	3.39107e-12	1
	Glyma.02G142500	82	Glyma.02G142500	Glyma.02G142500	mixed_up_down	Glyma.05G197900	82	Glyma.05G197900	Glyma.05G197900	up	0.99225	2.1736e-10	1
	Glyma.02G142500	82	Glyma.02G142500	Glyma.02G142500	mixed_up_down	Glyma.06G006800	82	Glyma.06G006800	Glyma.06G006800	mixed_up_down	0.994981	2.48601e-11	1
	Glyma.02G142500	82	Glyma.02G142500	Glyma.02G142500	mixed_up_down	Glyma.06G067000	18	Glyma.06G067000	Glyma.06G067000	mixed_up_down	0.994992	2.45977e-11	1
	Glyma.02G142500	82	Glyma.02G142500	Glyma.02G142500	mixed_up_down	Glyma.06G282200	84	Glyma.06G282200	Glyma.06G282200	mixed_up_down	0.99325	1.09139e-10	1
	Glyma.02G142500	82	Glyma.02G142500	Glyma.02G142500	mixed_up_down	Glyma.06G282400	82	Glyma.06G282400	Glyma.06G282400	mixed_up_down	0.993215	1.11967e-10	1
	Glyma.02G142500	82	Glyma.02G142500	Glyma.02G142500	mixed_up_down	Glyma.06G282500	83	Glyma.06G282500	Glyma.06G282500	mixed_up_down	0.994013	5.99956e-11	1
	Glyma.02G142500	82	Glyma.02G142500	Glyma.02G142500	mixed_up_down	Glyma.06G282600	82	Glyma.06G282600	Glyma.06G282600	mixed_up_down	0.993316	1.03868e-10	1
	Glyma.02G142500	82	Glyma.02G142500	Glyma.02G142500	mixed_up_down	Glyma.06G282700	84	Glyma.06G282700	Glyma.06G282700	mixed_up_down	0.993878	6.70397e-11	1
	Glyma.02G142500	82	Glyma.02G142500	Glyma.02G142500	mixed_up_down	Glyma.06G282900	82	Glyma.06G282900	Glyma.06G282900	up	0.993393	9.80864e-11	1
	Glyma.02G142500	82	Glyma.02G142500	Glyma.02G142500	mixed_up_down	Glyma.06G306900	80	Glyma.06G306900	Glyma.06G306900	mixed_up_down	0.990183	7.06373e-10	1
	Glyma.02G142500	82	Glyma.02G142500	Glyma.02G142500	mixed_up_down	Glyma.08G009900	82	Glyma.08G009900	Glyma.08G009900	mixed_up_down	0.998389	8.52651e-14	1
	Glyma.02G142500	82	Glyma.02G142500	Glyma.02G142500	mixed_up_down	Glyma.08G155400	82	Glyma.08G155400	Glyma.08G155400	mixed_up_down	0.993393	9.80864e-11	1
	Glyma.02G142500	82	Glyma.02G142500	Glyma.02G142500	mixed_up_down	Glyma.08G155500	82	Glyma.08G155500	Glyma.08G155500	mixed_up_down	0.993393	9.80864e-11	1
	Glyma.02G142500	82	Glyma.02G142500	Glyma.02G142500	mixed_up_down	Glyma.08G155700	85	Glyma.08G155700	Glyma.08G155700	mixed_up_down	0.995022	2.38698e-11	1
	Glyma.02G142500	82	Glyma.02G142500	Glyma.02G142500	mixed_up_down	Glyma.08G232100	28	Glyma.08G232100	Glyma.08G232100	mixed_up_down	0.995741	1.09592e-11	1
	Glyma.02G142500	82	Glyma.02G142500	Glyma.02G142500	mixed_up_down	Glyma.08G232200	84	Glyma.08G232200	Glyma.08G232200	mixed_up_down	0.994103	5.56253e-11	1
	Glyma.02G142500	82	Glyma.02G142500	Glyma.02G142500	mixed_up_down	Glyma.08G328600	80	Glyma.08G328600	Glyma.08G328600	mixed_up_down	0.995131	2.13816e-11	1
	Glyma.02G142500	82	Glyma.02G142500	Glyma.02G142500	mixed_up_down	Glyma.08G342300	82	Glyma.08G342300	Glyma.08G342300	mixed_up_down	0.993393	9.80864e-11	1
	Glyma.02G142500	82	Glyma.02G142500	Glyma.02G142500	mixed_up_down	Glyma.09G221800	82	Glyma.09G221800	Glyma.09G221800	mixed_up_down	0.993288	1.0612e-10	1
	Glyma.02G142500	82	Glyma.02G142500	Glyma.02G142500	mixed_up_down	Glyma.10G017000	82	Glyma.10G017000	Glyma.10G017000	mixed_up_down	0.993393	9.80864e-11	1
	Glyma.02G142500	82	Glyma.02G142500	Glyma.02G142500	mixed_up_down	Glyma.10G056000	37	Glyma.10G056000	Glyma.10G056000	mixed_up_down	0.995456	1.51443e-11	1
	Glyma.02G142500	82	Glyma.02G142500	Glyma.02G142500	mixed_up_down	Glyma.10G056300	77	Glyma.10G056300	Glyma.10G056300	mixed_up_down	0.99725	1.2319e-12	1
	Glyma.02G142500	82	Glyma.02G142500	Glyma.02G142500	mixed_up_down	Glyma.10G296600	84	Glyma.10G296600	Glyma.10G296600	mixed_up_down	0.99308	1.23537e-10	1
	Glyma.02G142500	82	Glyma.02G142500	Glyma.02G142500	mixed_up_down	Glyma.11G066500	8	Glyma.11G066500	Glyma.11G066500	mixed_up_down	0.992326	2.06898e-10	1
	Glyma.02G142500	82	Glyma.02G142500	Glyma.02G142500	mixed_up_down	Glyma.11G120600	82	Glyma.11G120600	Glyma.11G120600	mixed_up_down	0.993541	8.75902e-11	1
	Glyma.02G142500	82	Glyma.02G142500	Glyma.02G142500	mixed_up_down	Glyma.11G179100	82	Glyma.11G179100	Glyma.11G179100	mixed_up_down	0.991653	3.14666e-10	1
	Glyma.02G142500	82	Glyma.02G142500	Glyma.02G142500	mixed_up_down	Glyma.11G238000	81	Glyma.11G238000	Glyma.11G238000	mixed_up_down	0.99357	8.56133e-11	1
	Glyma.02G142500	82	Glyma.02G142500	Glyma.02G142500	mixed_up_down	Glyma.12G035200	18	Glyma.12G035200	Glyma.12G035200	mixed_up_down	0.992878	1.42597e-10	1
	Glyma.02G142500	82	Glyma.02G142500	Glyma.02G142500	mixed_up_down	Glyma.12G122300	83	Glyma.12G122300	Glyma.12G122300	up	0.993895	6.60938e-11	1
	Glyma.02G142500	82	Glyma.02G142500	Glyma.02G142500	mixed_up_down	Glyma.12G124100	82	Glyma.12G124100	Glyma.12G124100	mixed_up_down	0.993393	9.80864e-11	1
	Glyma.02G142500	82	Glyma.02G142500	Glyma.02G142500	mixed_up_down	Glyma.12G124200	82	Glyma.12G124200	Glyma.12G124200	mixed_up_down	0.993393	9.80864e-11	1
	Glyma.02G142500	82	Glyma.02G142500	Glyma.02G142500	mixed_up_down	Glyma.12G124900	82	Glyma.12G124900	Glyma.12G124900	mixed_up_down	0.993393	9.80864e-11	1
	Glyma.02G142500	82	Glyma.02G142500	Glyma.02G142500	mixed_up_down	Glyma.13G091400	82	Glyma.13G091400	Glyma.13G091400	mixed_up_down	0.993393	9.80864e-11	1
	Glyma.02G142500	82	Glyma.02G142500	Glyma.02G142500	mixed_up_down	Glyma.13G165000	85	Glyma.13G165000	Glyma.13G165000	mixed_up_down	0.997137	1.50679e-12	1
	Glyma.02G142500	82	Glyma.02G142500	Glyma.02G142500	mixed_up_down	Glyma.13G218300	81	Glyma.13G218300	Glyma.13G218300	mixed_up_down	0.992395	1.97793e-10	1
	Glyma.02G142500	82	Glyma.02G142500	Glyma.02G142500	mixed_up_down	Glyma.13G240500	83	Glyma.13G240500	Glyma.13G240500	down	0.995407	1.59792e-11	1
	Glyma.02G142500	82	Glyma.02G142500	Glyma.02G142500	mixed_up_down	Glyma.13G319700	84	Glyma.13G319700	Glyma.13G319700	mixed_up_down	0.993928	6.43556e-11	1
	Glyma.02G142500	82	Glyma.02G142500	Glyma.02G142500	mixed_up_down	Glyma.14G014200	78	Glyma.14G014200	Glyma.14G014200	mixed_up_down	0.991757	2.9563e-10	1
	Glyma.02G142500	82	Glyma.02G142500	Glyma.02G142500	mixed_up_down	Glyma.15G066200	82	Glyma.15G066200	Glyma.15G066200	mixed_up_down	0.993393	9.80864e-11	1
	Glyma.02G142500	82	Glyma.02G142500	Glyma.02G142500	mixed_up_down	Glyma.15G140200	76	Glyma.15G140200	Glyma.15G140200	mixed_up_down	0.991592	3.26286e-10	1
	Glyma.02G142500	82	Glyma.02G142500	Glyma.02G142500	mixed_up_down	Glyma.15G238600	84	Glyma.15G238600	Glyma.15G238600	up	0.994027	5.92579e-11	1
	Glyma.02G142500	82	Glyma.02G142500	Glyma.02G142500	mixed_up_down	Glyma.16G068900	4	Glyma.16G068900	Glyma.16G068900	mixed_up_down	0.992789	1.51666e-10	1
	Glyma.02G142500	82	Glyma.02G142500	Glyma.02G142500	mixed_up_down	Glyma.16G079500	82	Glyma.16G079500	Glyma.16G079500	mixed_up_down	0.993621	8.22666e-11	1
	Glyma.02G142500	82	Glyma.02G142500	Glyma.02G142500	mixed_up_down	Glyma.16G129600	76	Glyma.16G129600	Glyma.16G129600	mixed_up_down	0.996003	7.98517e-12	1
	Glyma.02G142500	82	Glyma.02G142500	Glyma.02G142500	mixed_up_down	Glyma.17G027300	82	Glyma.17G027300	Glyma.17G027300	mixed_up_down	0.99319	1.1402e-10	1
	Glyma.02G142500	82	Glyma.02G142500	Glyma.02G142500	mixed_up_down	Glyma.17G106100	84	Glyma.17G106100	Glyma.17G106100	mixed_up_down	0.99809	1.99396e-13	1
	Glyma.02G142500	82	Glyma.02G142500	Glyma.02G142500	mixed_up_down	Glyma.17G115300	19	Glyma.17G115300	Glyma.17G115300	mixed_up_down	0.991601	3.2451e-10	1
	Glyma.02G142500	82	Glyma.02G142500	Glyma.02G142500	mixed_up_down	Glyma.17G139400	82	Glyma.17G139400	Glyma.17G139400	mixed_up_down	0.993548	8.71325e-11	1
	Glyma.02G142500	82	Glyma.02G142500	Glyma.02G142500	mixed_up_down	Glyma.17G157400	83	Glyma.17G157400	Glyma.17G157400	mixed_up_down	0.995842	9.72245e-12	1
	Glyma.02G142500	82	Glyma.02G142500	Glyma.02G142500	mixed_up_down	Glyma.18G019300	75	Glyma.18G019300	Glyma.18G019300	mixed_up_down	0.998204	1.46771e-13	1
	Glyma.02G142500	82	Glyma.02G142500	Glyma.02G142500	mixed_up_down	Glyma.18G054000	82	Glyma.18G054000	Glyma.18G054000	up	0.992752	1.55662e-10	1
	Glyma.02G142500	82	Glyma.02G142500	Glyma.02G142500	mixed_up_down	Glyma.18G078200	17	Glyma.18G078200	Glyma.18G078200	mixed_up_down	0.99227	2.1455e-10	1
	Glyma.02G142500	82	Glyma.02G142500	Glyma.02G142500	mixed_up_down	Glyma.18G215100	85	Glyma.18G215100	Glyma.18G215100	mixed_up_down	0.995415	1.58389e-11	1
	Glyma.02G142500	82	Glyma.02G142500	Glyma.02G142500	mixed_up_down	Glyma.18G225000	82	Glyma.18G225000	Glyma.18G225000	mixed_up_down	0.993488	9.12026e-11	1
	Glyma.02G142500	82	Glyma.02G142500	Glyma.02G142500	mixed_up_down	Glyma.19G019600	82	Glyma.19G019600	Glyma.19G019600	mixed_up_down	0.993799	7.14533e-11	1
	Glyma.02G142500	82	Glyma.02G142500	Glyma.02G142500	mixed_up_down	Glyma.19G161100	84	Glyma.19G161100	Glyma.19G161100	down	0.997923	3.03313e-13	1
	Glyma.02G142500	82	Glyma.02G142500	Glyma.02G142500	mixed_up_down	Glyma.20G034100	81	Glyma.20G034100	Glyma.20G034100	mixed_up_down	0.991976	2.58511e-10	1
	Glyma.02G142500	82	Glyma.02G142500	Glyma.02G142500	mixed_up_down	Glyma.20G246300	83	Glyma.20G246300	Glyma.20G246300	mixed_up_down	0.993758	7.38298e-11	1
	Glyma.02G142500	82	Glyma.02G142500	Glyma.02G142500	mixed_up_down	Glyma.20G247400	84	Glyma.20G247400	Glyma.20G247400	mixed_up_down	0.993137	1.18554e-10	1
	Glyma.02G142500	82	Glyma.02G142500	Glyma.02G142500	mixed_up_down	XLOC_001320	76	XLOC_001320	XLOC_001320	down	0.996101	7.0477e-12	1
	Glyma.02G142500	82	Glyma.02G142500	Glyma.02G142500	mixed_up_down	XLOC_029029	82	XLOC_029029	XLOC_029029	mixed_up_down	0.993393	9.80864e-11	1
	Glyma.02G142500	82	Glyma.02G142500	Glyma.02G142500	mixed_up_down	XLOC_040788	37	XLOC_040788	XLOC_040788	mixed_up_down	0.996155	6.57163e-12	1
105	Glyma.02G148800	4	Glyma.02G148800	Glyma.02G148800	down	Glyma.04G093300	4	Glyma.04G093300	Glyma.04G093300	mixed_up_down	0.994547	3.76219e-11	1
	Glyma.02G148800	4	Glyma.02G148800	Glyma.02G148800	down	Glyma.15G172200	7	Glyma.15G172200	Glyma.15G172200	mixed_up_down	0.990613	5.65128e-10	1
	Glyma.02G148800	4	Glyma.02G148800	Glyma.02G148800	down	Glyma.15G226500	6	Glyma.15G226500	Glyma.15G226500	down	0.991112	4.30425e-10	1
	Glyma.02G148800	4	Glyma.02G148800	Glyma.02G148800	down	XLOC_047675	6	XLOC_047675	XLOC_047675	down	0.992405	1.96534e-10	1
106	Glyma.02G151000	3	Glyma.02G151000	Glyma.02G151000	mixed_up_down	Glyma.11G051000	4	Glyma.11G051000	Glyma.11G051000	mixed_up_down	0.994942	2.58469e-11	1
	Glyma.02G151000	3	Glyma.02G151000	Glyma.02G151000	mixed_up_down	Glyma.14G193000	5	Glyma.14G193000	Glyma.14G193000	mixed_up_down	0.990513	5.95733e-10	1
	Glyma.02G151000	3	Glyma.02G151000	Glyma.02G151000	mixed_up_down	XLOC_027034	2	XLOC_027034	XLOC_027034	mixed_up_down	0.992002	2.54289e-10	1
107	Glyma.02G153000	6	Glyma.02G153000	Glyma.02G153000	mixed_up_down	Glyma.02G183300	9	Glyma.02G183300	Glyma.02G183300	mixed_up_down	0.998078	2.06057e-13	1
	Glyma.02G153000	6	Glyma.02G153000	Glyma.02G153000	mixed_up_down	Glyma.07G143900	14	Glyma.07G143900	Glyma.07G143900	mixed_up_down	0.990384	6.3727e-10	1
	Glyma.02G153000	6	Glyma.02G153000	Glyma.02G153000	mixed_up_down	Glyma.08G285100	12	Glyma.08G285100	Glyma.08G285100	mixed_up_down	0.993189	1.1412e-10	1
	Glyma.02G153000	6	Glyma.02G153000	Glyma.02G153000	mixed_up_down	Glyma.10G021300	10	Glyma.10G021300	Glyma.10G021300	mixed_up_down	0.994586	3.62985e-11	1
	Glyma.02G153000	6	Glyma.02G153000	Glyma.02G153000	mixed_up_down	Glyma.12G198200	11	Glyma.12G198200	Glyma.12G198200	mixed_up_down	0.999393	6.66134e-16	1
	Glyma.02G153000	6	Glyma.02G153000	Glyma.02G153000	mixed_up_down	Glyma.18G049600	14	Glyma.18G049600	Glyma.18G049600	mixed_up_down	0.994676	3.33817e-11	1
108	Glyma.02G164400	10	Glyma.02G164400	Glyma.02G164400	mixed_up_down	Glyma.07G049900	9	Glyma.07G049900	Glyma.07G049900	mixed_up_down	0.991916	2.68297e-10	1
	Glyma.02G164400	10	Glyma.02G164400	Glyma.02G164400	mixed_up_down	Glyma.13G001200	10	Glyma.13G001200	Glyma.13G001200	mixed_up_down	0.995867	9.43157e-12	1
	Glyma.02G164400	10	Glyma.02G164400	Glyma.02G164400	mixed_up_down	Glyma.13G299200	10	Glyma.13G299200	Glyma.13G299200	mixed_up_down	0.990624	5.61884e-10	1
	Glyma.02G164400	10	Glyma.02G164400	Glyma.02G164400	mixed_up_down	Glyma.14G094800	10	Glyma.14G094800	Glyma.14G094800	mixed_up_down	0.992665	1.65135e-10	1
	Glyma.02G164400	10	Glyma.02G164400	Glyma.02G164400	mixed_up_down	Glyma.15G213700	8	Glyma.15G213700	Glyma.15G213700	mixed_up_down	0.993431	9.52853e-11	1
	Glyma.02G164400	10	Glyma.02G164400	Glyma.02G164400	mixed_up_down	Glyma.15G275600	12	Glyma.15G275600	Glyma.15G275600	mixed_up_down	0.996048	7.5433e-12	1
	Glyma.02G164400	10	Glyma.02G164400	Glyma.02G164400	mixed_up_down	Glyma.16G036000	2	Glyma.16G036000	Glyma.16G036000	mixed_up_down	0.99158	3.28667e-10	1
	Glyma.02G164400	10	Glyma.02G164400	Glyma.02G164400	mixed_up_down	Glyma.17G133200	10	Glyma.17G133200	Glyma.17G133200	mixed_up_down	0.997974	2.67786e-13	1
	Glyma.02G164400	10	Glyma.02G164400	Glyma.02G164400	mixed_up_down	Glyma.18G265700	10	Glyma.18G265700	Glyma.18G265700	mixed_up_down	0.999068	5.55112e-15	1
109	Glyma.02G177500	17	Glyma.02G177500	Glyma.02G177500	up	Glyma.05G042500	22	Glyma.05G042500	Glyma.05G042500	down	0.994078	5.6793e-11	1
	Glyma.02G177500	17	Glyma.02G177500	Glyma.02G177500	up	Glyma.07G178200	23	Glyma.07G178200	Glyma.07G178200	down	0.992753	1.55521e-10	1
	Glyma.02G177500	17	Glyma.02G177500	Glyma.02G177500	up	Glyma.07G255300	22	Glyma.07G255300	Glyma.07G255300	down	0.994873	2.76505e-11	1
	Glyma.02G177500	17	Glyma.02G177500	Glyma.02G177500	up	Glyma.07G271900	27	Glyma.07G271900	Glyma.07G271900	down	0.993614	8.27574e-11	1
	Glyma.02G177500	17	Glyma.02G177500	Glyma.02G177500	up	Glyma.11G058500	20	Glyma.11G058500	Glyma.11G058500	up	0.993466	9.27853e-11	1
	Glyma.02G177500	17	Glyma.02G177500	Glyma.02G177500	up	Glyma.11G164300	22	Glyma.11G164300	Glyma.11G164300	mixed_up_down	0.997604	6.1906e-13	1
	Glyma.02G177500	17	Glyma.02G177500	Glyma.02G177500	up	Glyma.15G073100	25	Glyma.15G073100	Glyma.15G073100	down	0.992737	1.57192e-10	1
	Glyma.02G177500	17	Glyma.02G177500	Glyma.02G177500	up	Glyma.15G127500	16	Glyma.15G127500	Glyma.15G127500	down	0.993622	8.22502e-11	1
	Glyma.02G177500	17	Glyma.02G177500	Glyma.02G177500	up	Glyma.15G140500	22	Glyma.15G140500	Glyma.15G140500	mixed_up_down	0.993111	1.20817e-10	1
	Glyma.02G177500	17	Glyma.02G177500	Glyma.02G177500	up	Glyma.18G115700	23	Glyma.18G115700	Glyma.18G115700	mixed_up_down	0.995168	2.05858e-11	1
	Glyma.02G177500	17	Glyma.02G177500	Glyma.02G177500	up	Glyma.19G066300	23	Glyma.19G066300	Glyma.19G066300	down	0.992183	2.26929e-10	1
	Glyma.02G177500	17	Glyma.02G177500	Glyma.02G177500	up	XLOC_001931	27	XLOC_001931	XLOC_001931	down	0.995718	1.12617e-11	1
	Glyma.02G177500	17	Glyma.02G177500	Glyma.02G177500	up	XLOC_004454	22	XLOC_004454	XLOC_004454	down	0.991029	4.50841e-10	1
	Glyma.02G177500	17	Glyma.02G177500	Glyma.02G177500	up	XLOC_016632	23	XLOC_016632	XLOC_016632	down	0.992709	1.6028e-10	1
	Glyma.02G177500	17	Glyma.02G177500	Glyma.02G177500	up	XLOC_041592	24	XLOC_041592	XLOC_041592	down	0.994021	5.95985e-11	1
	Glyma.02G177500	17	Glyma.02G177500	Glyma.02G177500	up	XLOC_043017	23	XLOC_043017	XLOC_043017	down	0.992919	1.38562e-10	1
	Glyma.02G177500	17	Glyma.02G177500	Glyma.02G177500	up	XLOC_043308	20	XLOC_043308	XLOC_043308	down	0.994823	2.90337e-11	1
110	Glyma.02G183300	9	Glyma.02G183300	Glyma.02G183300	mixed_up_down	Glyma.04G191700	15	Glyma.04G191700	Glyma.04G191700	up	0.992955	1.35074e-10	1
	Glyma.02G183300	9	Glyma.02G183300	Glyma.02G183300	mixed_up_down	Glyma.08G285100	12	Glyma.08G285100	Glyma.08G285100	mixed_up_down	0.996215	6.07581e-12	1
	Glyma.02G183300	9	Glyma.02G183300	Glyma.02G183300	mixed_up_down	Glyma.12G084000	18	Glyma.12G084000	Glyma.12G084000	mixed_up_down	0.993643	8.09219e-11	1
	Glyma.02G183300	9	Glyma.02G183300	Glyma.02G183300	mixed_up_down	Glyma.12G138800	15	Glyma.12G138800	Glyma.12G138800	mixed_up_down	0.99258	1.74982e-10	1
	Glyma.02G183300	9	Glyma.02G183300	Glyma.02G183300	mixed_up_down	Glyma.12G198200	11	Glyma.12G198200	Glyma.12G198200	mixed_up_down	0.998869	1.46549e-14	1
	Glyma.02G183300	9	Glyma.02G183300	Glyma.02G183300	mixed_up_down	Glyma.18G049600	14	Glyma.18G049600	Glyma.18G049600	mixed_up_down	0.995278	1.83511e-11	1
	Glyma.02G183300	9	Glyma.02G183300	Glyma.02G183300	mixed_up_down	Glyma.18G211100	13	Glyma.18G211100	Glyma.18G211100	mixed_up_down	0.992496	1.85081e-10	1
	Glyma.02G183300	9	Glyma.02G183300	Glyma.02G183300	mixed_up_down	Glyma.20G238300	11	Glyma.20G238300	Glyma.20G238300	mixed_up_down	0.991215	4.06172e-10	1
111	Glyma.02G184000	8	Glyma.02G184000	Glyma.02G184000	mixed_up_down	Glyma.06G118500	8	Glyma.06G118500	Glyma.06G118500	mixed_up_down	0.998161	1.65201e-13	1
	Glyma.02G184000	8	Glyma.02G184000	Glyma.02G184000	mixed_up_down	Glyma.06G217900	12	Glyma.06G217900	Glyma.06G217900	mixed_up_down	0.9962	6.20082e-12	1
	Glyma.02G184000	8	Glyma.02G184000	Glyma.02G184000	mixed_up_down	Glyma.09G184600	10	Glyma.09G184600	Glyma.09G184600	mixed_up_down	0.991761	2.94954e-10	1
	Glyma.02G184000	8	Glyma.02G184000	Glyma.02G184000	mixed_up_down	Glyma.13G275400	14	Glyma.13G275400	Glyma.13G275400	mixed_up_down	0.991493	3.45914e-10	1
	Glyma.02G184000	8	Glyma.02G184000	Glyma.02G184000	mixed_up_down	Glyma.15G126100	11	Glyma.15G126100	Glyma.15G126100	mixed_up_down	0.997326	1.07114e-12	1
	Glyma.02G184000	8	Glyma.02G184000	Glyma.02G184000	mixed_up_down	Glyma.15G208300	10	Glyma.15G208300	Glyma.15G208300	mixed_up_down	0.995202	1.98659e-11	1
	Glyma.02G184000	8	Glyma.02G184000	Glyma.02G184000	mixed_up_down	Glyma.18G278100	9	Glyma.18G278100	Glyma.18G278100	mixed_up_down	0.997222	1.29652e-12	1
112	Glyma.02G188300	5	Glyma.02G188300	Glyma.02G188300	mixed_up_down	Glyma.02G283500	9	Glyma.02G283500	Glyma.02G283500	mixed_up_down	0.99469	3.29634e-11	1
	Glyma.02G188300	5	Glyma.02G188300	Glyma.02G188300	mixed_up_down	Glyma.15G019500	4	Glyma.15G019500	Glyma.15G019500	down	0.996547	3.84626e-12	1
	Glyma.02G188300	5	Glyma.02G188300	Glyma.02G188300	mixed_up_down	Glyma.20G187400	7	Glyma.20G187400	Glyma.20G187400	mixed_up_down	0.99395	6.31817e-11	1
	Glyma.02G188300	5	Glyma.02G188300	Glyma.02G188300	mixed_up_down	XLOC_036643	10	XLOC_036643	XLOC_036643	mixed_up_down	0.994036	5.8852e-11	1
	Glyma.02G188300	5	Glyma.02G188300	Glyma.02G188300	mixed_up_down	XLOC_042521	6	XLOC_042521	XLOC_042521	mixed_up_down	0.996076	7.27796e-12	1
113	Glyma.02G192200	1	Glyma.02G192200	Glyma.02G192200	mixed_up_down	Glyma.19G005900	5	Glyma.19G005900	Glyma.19G005900	mixed_up_down	0.994145	5.36586e-11	1
114	Glyma.02G202500	1	Glyma.02G202500	Glyma.02G202500	mixed_up_down	Glyma.13G330200	1	Glyma.13G330200	Glyma.13G330200	mixed_up_down	0.99025	6.82781e-10	1
115	Glyma.02G204700	15	Glyma.02G204700	Glyma.02G204700	mixed_up_down	Glyma.03G208300	16	Glyma.03G208300	Glyma.03G208300	mixed_up_down	0.994147	5.3566e-11	1
	Glyma.02G204700	15	Glyma.02G204700	Glyma.02G204700	mixed_up_down	Glyma.04G233500	20	Glyma.04G233500	Glyma.04G233500	mixed_up_down	0.99721	1.32516e-12	1
	Glyma.02G204700	15	Glyma.02G204700	Glyma.02G204700	mixed_up_down	Glyma.05G192600	15	Glyma.05G192600	Glyma.05G192600	mixed_up_down	0.992318	2.08037e-10	1
	Glyma.02G204700	15	Glyma.02G204700	Glyma.02G204700	mixed_up_down	Glyma.06G235100	19	Glyma.06G235100	Glyma.06G235100	mixed_up_down	0.996113	6.94333e-12	1
	Glyma.02G204700	15	Glyma.02G204700	Glyma.02G204700	mixed_up_down	Glyma.06G262400	12	Glyma.06G262400	Glyma.06G262400	mixed_up_down	0.992051	2.46581e-10	1
	Glyma.02G204700	15	Glyma.02G204700	Glyma.02G204700	mixed_up_down	Glyma.08G213000	17	Glyma.08G213000	Glyma.08G213000	mixed_up_down	0.996004	7.97407e-12	1
	Glyma.02G204700	15	Glyma.02G204700	Glyma.02G204700	mixed_up_down	Glyma.08G247300	21	Glyma.08G247300	Glyma.08G247300	mixed_up_down	0.992187	2.26272e-10	1
	Glyma.02G204700	15	Glyma.02G204700	Glyma.02G204700	mixed_up_down	Glyma.08G344000	11	Glyma.08G344000	Glyma.08G344000	mixed_up_down	0.996735	2.90501e-12	1
	Glyma.02G204700	15	Glyma.02G204700	Glyma.02G204700	mixed_up_down	Glyma.09G087700	18	Glyma.09G087700	Glyma.09G087700	mixed_up_down	0.990538	5.87889e-10	1
	Glyma.02G204700	15	Glyma.02G204700	Glyma.02G204700	mixed_up_down	Glyma.12G029100	14	Glyma.12G029100	Glyma.12G029100	mixed_up_down	0.99409	5.62324e-11	1
	Glyma.02G204700	15	Glyma.02G204700	Glyma.02G204700	mixed_up_down	Glyma.13G088900	16	Glyma.13G088900	Glyma.13G088900	mixed_up_down	0.996485	4.20042e-12	1
	Glyma.02G204700	15	Glyma.02G204700	Glyma.02G204700	mixed_up_down	Glyma.14G110000	22	Glyma.14G110000	Glyma.14G110000	mixed_up_down	0.994775	3.04055e-11	1
	Glyma.02G204700	15	Glyma.02G204700	Glyma.02G204700	mixed_up_down	Glyma.14G197900	20	Glyma.14G197900	Glyma.14G197900	mixed_up_down	0.995846	9.66893e-12	1
	Glyma.02G204700	15	Glyma.02G204700	Glyma.02G204700	mixed_up_down	Glyma.20G068300	11	Glyma.20G068300	Glyma.20G068300	mixed_up_down	0.992338	2.05367e-10	1
116	Glyma.02G205600	1	Glyma.02G205600	Glyma.02G205600	mixed_up_down	Glyma.07G200000	3	Glyma.07G200000	Glyma.07G200000	mixed_up_down	0.99114	4.2354e-10	1
117	Glyma.02G215700	7	Glyma.02G215700	Glyma.02G215700	mixed_up_down	Glyma.07G091400	8	Glyma.07G091400	Glyma.07G091400	mixed_up_down	0.991446	3.55444e-10	1
	Glyma.02G215700	7	Glyma.02G215700	Glyma.02G215700	mixed_up_down	Glyma.12G117700	6	Glyma.12G117700	Glyma.12G117700	mixed_up_down	0.995874	9.35274e-12	1
	Glyma.02G215700	7	Glyma.02G215700	Glyma.02G215700	mixed_up_down	Glyma.12G233700	1	Glyma.12G233700	Glyma.12G233700	mixed_up_down	0.993086	1.23028e-10	1
	Glyma.02G215700	7	Glyma.02G215700	Glyma.02G215700	mixed_up_down	XLOC_023802	3	XLOC_023802	XLOC_023802	mixed_up_down	0.99216	2.30222e-10	1
	Glyma.02G215700	7	Glyma.02G215700	Glyma.02G215700	mixed_up_down	XLOC_040990	3	XLOC_040990	XLOC_040990	up	0.99204	2.4839e-10	1
118	Glyma.02G221500	10	Glyma.02G221500	Glyma.02G221500	down	Glyma.04G158800	9	Glyma.04G158800	Glyma.04G158800	mixed_up_down	0.991818	2.84871e-10	1
	Glyma.02G221500	10	Glyma.02G221500	Glyma.02G221500	down	Glyma.04G240100	8	Glyma.04G240100	Glyma.04G240100	mixed_up_down	0.991336	3.78975e-10	1
	Glyma.02G221500	10	Glyma.02G221500	Glyma.02G221500	down	Glyma.05G233700	9	Glyma.05G233700	Glyma.05G233700	mixed_up_down	0.991385	3.68446e-10	1
	Glyma.02G221500	10	Glyma.02G221500	Glyma.02G221500	down	Glyma.12G009200	8	Glyma.12G009200	Glyma.12G009200	mixed_up_down	0.9991	4.66294e-15	1
	Glyma.02G221500	10	Glyma.02G221500	Glyma.02G221500	down	Glyma.12G130000	8	Glyma.12G130000	Glyma.12G130000	mixed_up_down	0.990617	5.63938e-10	1
	Glyma.02G221500	10	Glyma.02G221500	Glyma.02G221500	down	Glyma.15G003800	8	Glyma.15G003800	Glyma.15G003800	down	0.992087	2.41043e-10	1
	Glyma.02G221500	10	Glyma.02G221500	Glyma.02G221500	down	Glyma.16G027200	11	Glyma.16G027200	Glyma.16G027200	mixed_up_down	0.991881	2.74148e-10	1
	Glyma.02G221500	10	Glyma.02G221500	Glyma.02G221500	down	Glyma.17G073200	10	Glyma.17G073200	Glyma.17G073200	mixed_up_down	0.99298	1.32727e-10	1
	Glyma.02G221500	10	Glyma.02G221500	Glyma.02G221500	down	Glyma.19G045800	10	Glyma.19G045800	Glyma.19G045800	mixed_up_down	0.998129	1.79856e-13	1
	Glyma.02G221500	10	Glyma.02G221500	Glyma.02G221500	down	XLOC_013582	9	XLOC_013582	XLOC_013582	mixed_up_down	0.992389	1.98576e-10	1
119	Glyma.02G221900	32	Glyma.02G221900	Glyma.02G221900	mixed_up_down	Glyma.03G158600	84	Glyma.03G158600	Glyma.03G158600	mixed_up_down	0.990276	6.73611e-10	1
	Glyma.02G221900	32	Glyma.02G221900	Glyma.02G221900	mixed_up_down	Glyma.03G227500	14	Glyma.03G227500	Glyma.03G227500	mixed_up_down	0.993553	8.67879e-11	1
	Glyma.02G221900	32	Glyma.02G221900	Glyma.02G221900	mixed_up_down	Glyma.05G056300	81	Glyma.05G056300	Glyma.05G056300	mixed_up_down	0.993507	8.98766e-11	1
	Glyma.02G221900	32	Glyma.02G221900	Glyma.02G221900	mixed_up_down	Glyma.05G186300	81	Glyma.05G186300	Glyma.05G186300	mixed_up_down	0.990304	6.6396e-10	1
	Glyma.02G221900	32	Glyma.02G221900	Glyma.02G221900	mixed_up_down	Glyma.06G282200	84	Glyma.06G282200	Glyma.06G282200	mixed_up_down	0.990357	6.46065e-10	1
	Glyma.02G221900	32	Glyma.02G221900	Glyma.02G221900	mixed_up_down	Glyma.06G282500	83	Glyma.06G282500	Glyma.06G282500	mixed_up_down	0.990564	5.79974e-10	1
	Glyma.02G221900	32	Glyma.02G221900	Glyma.02G221900	mixed_up_down	Glyma.06G282700	84	Glyma.06G282700	Glyma.06G282700	mixed_up_down	0.99134	3.78093e-10	1
	Glyma.02G221900	32	Glyma.02G221900	Glyma.02G221900	mixed_up_down	Glyma.06G283800	61	Glyma.06G283800	Glyma.06G283800	mixed_up_down	0.991648	3.15665e-10	1
	Glyma.02G221900	32	Glyma.02G221900	Glyma.02G221900	mixed_up_down	Glyma.06G306900	80	Glyma.06G306900	Glyma.06G306900	mixed_up_down	0.991068	4.41013e-10	1
	Glyma.02G221900	32	Glyma.02G221900	Glyma.02G221900	mixed_up_down	Glyma.07G057600	6	Glyma.07G057600	Glyma.07G057600	up	0.99083	5.02816e-10	1
	Glyma.02G221900	32	Glyma.02G221900	Glyma.02G221900	mixed_up_down	Glyma.08G155700	85	Glyma.08G155700	Glyma.08G155700	mixed_up_down	0.99047	6.09276e-10	1
	Glyma.02G221900	32	Glyma.02G221900	Glyma.02G221900	mixed_up_down	Glyma.08G232200	84	Glyma.08G232200	Glyma.08G232200	mixed_up_down	0.990621	5.62575e-10	1
	Glyma.02G221900	32	Glyma.02G221900	Glyma.02G221900	mixed_up_down	Glyma.08G328600	80	Glyma.08G328600	Glyma.08G328600	mixed_up_down	0.992909	1.39553e-10	1
	Glyma.02G221900	32	Glyma.02G221900	Glyma.02G221900	mixed_up_down	Glyma.09G087400	71	Glyma.09G087400	Glyma.09G087400	up	0.995075	2.2629e-11	1
	Glyma.02G221900	32	Glyma.02G221900	Glyma.02G221900	mixed_up_down	Glyma.10G251700	8	Glyma.10G251700	Glyma.10G251700	mixed_up_down	0.99114	4.23741e-10	1
	Glyma.02G221900	32	Glyma.02G221900	Glyma.02G221900	mixed_up_down	Glyma.10G296600	84	Glyma.10G296600	Glyma.10G296600	mixed_up_down	0.990184	7.06125e-10	1
	Glyma.02G221900	32	Glyma.02G221900	Glyma.02G221900	mixed_up_down	Glyma.11G120600	82	Glyma.11G120600	Glyma.11G120600	mixed_up_down	0.990103	7.35373e-10	1
	Glyma.02G221900	32	Glyma.02G221900	Glyma.02G221900	mixed_up_down	Glyma.11G238000	81	Glyma.11G238000	Glyma.11G238000	mixed_up_down	0.991429	3.58999e-10	1
	Glyma.02G221900	32	Glyma.02G221900	Glyma.02G221900	mixed_up_down	Glyma.12G122300	83	Glyma.12G122300	Glyma.12G122300	up	0.993206	1.12714e-10	1
	Glyma.02G221900	32	Glyma.02G221900	Glyma.02G221900	mixed_up_down	Glyma.13G161100	4	Glyma.13G161100	Glyma.13G161100	mixed_up_down	0.991604	3.23948e-10	1
	Glyma.02G221900	32	Glyma.02G221900	Glyma.02G221900	mixed_up_down	Glyma.13G319700	84	Glyma.13G319700	Glyma.13G319700	mixed_up_down	0.990264	6.77867e-10	1
	Glyma.02G221900	32	Glyma.02G221900	Glyma.02G221900	mixed_up_down	Glyma.14G014200	78	Glyma.14G014200	Glyma.14G014200	mixed_up_down	0.99184	2.80992e-10	1
	Glyma.02G221900	32	Glyma.02G221900	Glyma.02G221900	mixed_up_down	Glyma.15G140200	76	Glyma.15G140200	Glyma.15G140200	mixed_up_down	0.991225	4.03805e-10	1
	Glyma.02G221900	32	Glyma.02G221900	Glyma.02G221900	mixed_up_down	Glyma.15G238600	84	Glyma.15G238600	Glyma.15G238600	up	0.991125	4.27282e-10	1
	Glyma.02G221900	32	Glyma.02G221900	Glyma.02G221900	mixed_up_down	Glyma.16G079500	82	Glyma.16G079500	Glyma.16G079500	mixed_up_down	0.991075	4.39397e-10	1
	Glyma.02G221900	32	Glyma.02G221900	Glyma.02G221900	mixed_up_down	Glyma.17G252400	62	Glyma.17G252400	Glyma.17G252400	mixed_up_down	0.991859	2.77723e-10	1
	Glyma.02G221900	32	Glyma.02G221900	Glyma.02G221900	mixed_up_down	Glyma.18G215100	85	Glyma.18G215100	Glyma.18G215100	mixed_up_down	0.991113	4.30105e-10	1
	Glyma.02G221900	32	Glyma.02G221900	Glyma.02G221900	mixed_up_down	Glyma.19G019600	82	Glyma.19G019600	Glyma.19G019600	mixed_up_down	0.99449	3.96123e-11	1
	Glyma.02G221900	32	Glyma.02G221900	Glyma.02G221900	mixed_up_down	Glyma.20G246300	83	Glyma.20G246300	Glyma.20G246300	mixed_up_down	0.990442	6.18217e-10	1
	Glyma.02G221900	32	Glyma.02G221900	Glyma.02G221900	mixed_up_down	Glyma.20G247400	84	Glyma.20G247400	Glyma.20G247400	mixed_up_down	0.990358	6.45863e-10	1
120	Glyma.02G226700	1	Glyma.02G226700	Glyma.02G226700	mixed_up_down	Glyma.12G194600	1	Glyma.12G194600	Glyma.12G194600	mixed_up_down	0.996947	2.07923e-12	1
121	Glyma.02G230800	7	Glyma.02G230800	Glyma.02G230800	mixed_up_down	Glyma.06G061000	9	Glyma.06G061000	Glyma.06G061000	mixed_up_down	0.991664	3.12566e-10	1
	Glyma.02G230800	7	Glyma.02G230800	Glyma.02G230800	mixed_up_down	Glyma.06G171400	9	Glyma.06G171400	Glyma.06G171400	mixed_up_down	0.990136	7.23279e-10	1
	Glyma.02G230800	7	Glyma.02G230800	Glyma.02G230800	mixed_up_down	Glyma.08G361400	4	Glyma.08G361400	Glyma.08G361400	mixed_up_down	0.992857	1.44735e-10	1
	Glyma.02G230800	7	Glyma.02G230800	Glyma.02G230800	mixed_up_down	Glyma.11G195100	4	Glyma.11G195100	Glyma.11G195100	mixed_up_down	0.993072	1.24212e-10	1
	Glyma.02G230800	7	Glyma.02G230800	Glyma.02G230800	mixed_up_down	Glyma.14G188900	8	Glyma.14G188900	Glyma.14G188900	mixed_up_down	0.993023	1.28694e-10	1
	Glyma.02G230800	7	Glyma.02G230800	Glyma.02G230800	mixed_up_down	Glyma.20G126800	9	Glyma.20G126800	Glyma.20G126800	mixed_up_down	0.998691	3.01981e-14	1
	Glyma.02G230800	7	Glyma.02G230800	Glyma.02G230800	mixed_up_down	XLOC_034214	6	XLOC_034214	XLOC_034214	mixed_up_down	0.995015	2.40372e-11	1
122	Glyma.02G231100	5	Glyma.02G231100	Glyma.02G231100	mixed_up_down	Glyma.08G068600	5	Glyma.08G068600	Glyma.08G068600	mixed_up_down	0.992083	2.41694e-10	1
	Glyma.02G231100	5	Glyma.02G231100	Glyma.02G231100	mixed_up_down	Glyma.10G003200	4	Glyma.10G003200	Glyma.10G003200	mixed_up_down	0.99014	7.21961e-10	1
	Glyma.02G231100	5	Glyma.02G231100	Glyma.02G231100	mixed_up_down	Glyma.13G232500	6	Glyma.13G232500	Glyma.13G232500	mixed_up_down	0.991406	3.63945e-10	1
	Glyma.02G231100	5	Glyma.02G231100	Glyma.02G231100	mixed_up_down	Glyma.18G116900	3	Glyma.18G116900	Glyma.18G116900	mixed_up_down	0.992108	2.37902e-10	1
	Glyma.02G231100	5	Glyma.02G231100	Glyma.02G231100	mixed_up_down	Glyma.19G084200	10	Glyma.19G084200	Glyma.19G084200	mixed_up_down	0.990232	6.88965e-10	1
123	Glyma.02G237000	1	Glyma.02G237000	Glyma.02G237000	up	Glyma.09G080700	22	Glyma.09G080700	Glyma.09G080700	mixed_up_down	0.992522	1.81879e-10	1
124	Glyma.02G241400	38	Glyma.02G241400	Glyma.02G241400	up	Glyma.04G003200	48	Glyma.04G003200	Glyma.04G003200	mixed_up_down	0.994979	2.49307e-11	1
	Glyma.02G241400	38	Glyma.02G241400	Glyma.02G241400	up	Glyma.04G167800	34	Glyma.04G167800	Glyma.04G167800	mixed_up_down	0.996813	2.57394e-12	1
	Glyma.02G241400	38	Glyma.02G241400	Glyma.02G241400	up	Glyma.04G172500	36	Glyma.04G172500	Glyma.04G172500	mixed_up_down	0.99622	6.04272e-12	1
	Glyma.02G241400	38	Glyma.02G241400	Glyma.02G241400	up	Glyma.04G192500	46	Glyma.04G192500	Glyma.04G192500	mixed_up_down	0.997362	1.00098e-12	1
	Glyma.02G241400	38	Glyma.02G241400	Glyma.02G241400	up	Glyma.04G198500	35	Glyma.04G198500	Glyma.04G198500	mixed_up_down	0.996707	3.03446e-12	1
	Glyma.02G241400	38	Glyma.02G241400	Glyma.02G241400	up	Glyma.05G213700	42	Glyma.05G213700	Glyma.05G213700	mixed_up_down	0.997384	9.60565e-13	1
	Glyma.02G241400	38	Glyma.02G241400	Glyma.02G241400	up	Glyma.05G241900	41	Glyma.05G241900	Glyma.05G241900	up	0.998512	5.72875e-14	1
	Glyma.02G241400	38	Glyma.02G241400	Glyma.02G241400	up	Glyma.06G160400	38	Glyma.06G160400	Glyma.06G160400	mixed_up_down	0.996535	3.90887e-12	1
	Glyma.02G241400	38	Glyma.02G241400	Glyma.02G241400	up	Glyma.06G313500	33	Glyma.06G313500	Glyma.06G313500	mixed_up_down	0.996395	4.76863e-12	1
	Glyma.02G241400	38	Glyma.02G241400	Glyma.02G241400	up	Glyma.08G120300	37	Glyma.08G120300	Glyma.08G120300	mixed_up_down	0.996956	2.04659e-12	1
	Glyma.02G241400	38	Glyma.02G241400	Glyma.02G241400	up	Glyma.08G163400	41	Glyma.08G163400	Glyma.08G163400	mixed_up_down	0.997954	2.81108e-13	1
	Glyma.02G241400	38	Glyma.02G241400	Glyma.02G241400	up	Glyma.08G201400	27	Glyma.08G201400	Glyma.08G201400	mixed_up_down	0.996129	6.80389e-12	1
	Glyma.02G241400	38	Glyma.02G241400	Glyma.02G241400	up	Glyma.08G212800	33	Glyma.08G212800	Glyma.08G212800	down	0.996032	7.69784e-12	1
	Glyma.02G241400	38	Glyma.02G241400	Glyma.02G241400	up	Glyma.08G224800	39	Glyma.08G224800	Glyma.08G224800	mixed_up_down	0.997362	1.00187e-12	1
	Glyma.02G241400	38	Glyma.02G241400	Glyma.02G241400	up	Glyma.08G253200	39	Glyma.08G253200	Glyma.08G253200	down	0.998342	9.81437e-14	1
	Glyma.02G241400	38	Glyma.02G241400	Glyma.02G241400	up	Glyma.09G080700	22	Glyma.09G080700	Glyma.09G080700	mixed_up_down	0.992913	1.39103e-10	1
	Glyma.02G241400	38	Glyma.02G241400	Glyma.02G241400	up	Glyma.10G043400	26	Glyma.10G043400	Glyma.10G043400	up	0.993848	6.86975e-11	1
	Glyma.02G241400	38	Glyma.02G241400	Glyma.02G241400	up	Glyma.10G164100	35	Glyma.10G164100	Glyma.10G164100	mixed_up_down	0.995798	1.02487e-11	1
	Glyma.02G241400	38	Glyma.02G241400	Glyma.02G241400	up	Glyma.10G172200	32	Glyma.10G172200	Glyma.10G172200	mixed_up_down	0.99555	1.36424e-11	1
	Glyma.02G241400	38	Glyma.02G241400	Glyma.02G241400	up	Glyma.10G248800	37	Glyma.10G248800	Glyma.10G248800	mixed_up_down	0.994755	3.09994e-11	1
	Glyma.02G241400	38	Glyma.02G241400	Glyma.02G241400	up	Glyma.11G244300	32	Glyma.11G244300	Glyma.11G244300	mixed_up_down	0.995461	1.50537e-11	1
	Glyma.02G241400	38	Glyma.02G241400	Glyma.02G241400	up	Glyma.13G177600	38	Glyma.13G177600	Glyma.13G177600	mixed_up_down	0.998104	1.92291e-13	1
	Glyma.02G241400	38	Glyma.02G241400	Glyma.02G241400	up	Glyma.13G204300	34	Glyma.13G204300	Glyma.13G204300	mixed_up_down	0.9919	2.70874e-10	1
	Glyma.02G241400	38	Glyma.02G241400	Glyma.02G241400	up	Glyma.14G189500	33	Glyma.14G189500	Glyma.14G189500	mixed_up_down	0.996113	6.94222e-12	1
	Glyma.02G241400	38	Glyma.02G241400	Glyma.02G241400	up	Glyma.15G011000	30	Glyma.15G011000	Glyma.15G011000	mixed_up_down	0.992695	1.61784e-10	1
	Glyma.02G241400	38	Glyma.02G241400	Glyma.02G241400	up	Glyma.18G107300	19	Glyma.18G107300	Glyma.18G107300	mixed_up_down	0.993444	9.43448e-11	1
	Glyma.02G241400	38	Glyma.02G241400	Glyma.02G241400	up	Glyma.18G109600	36	Glyma.18G109600	Glyma.18G109600	mixed_up_down	0.994993	2.45846e-11	1
	Glyma.02G241400	38	Glyma.02G241400	Glyma.02G241400	up	Glyma.18G244600	27	Glyma.18G244600	Glyma.18G244600	mixed_up_down	0.993848	6.87006e-11	1
	Glyma.02G241400	38	Glyma.02G241400	Glyma.02G241400	up	Glyma.20G052900	23	Glyma.20G052900	Glyma.20G052900	mixed_up_down	0.994741	3.13949e-11	1
	Glyma.02G241400	38	Glyma.02G241400	Glyma.02G241400	up	Glyma.20G131100	36	Glyma.20G131100	Glyma.20G131100	mixed_up_down	0.996113	6.93801e-12	1
	Glyma.02G241400	38	Glyma.02G241400	Glyma.02G241400	up	Glyma.20G172400	9	Glyma.20G172400	Glyma.20G172400	up	0.990308	6.62682e-10	1
	Glyma.02G241400	38	Glyma.02G241400	Glyma.02G241400	up	XLOC_022764	35	XLOC_022764	XLOC_022764	mixed_up_down	0.99763	5.86642e-13	1
	Glyma.02G241400	38	Glyma.02G241400	Glyma.02G241400	up	XLOC_036392	26	XLOC_036392	XLOC_036392	mixed_up_down	0.996004	7.97185e-12	1
125	Glyma.02G247100	12	Glyma.02G247100	Glyma.02G247100	mixed_up_down	Glyma.04G241000	10	Glyma.04G241000	Glyma.04G241000	mixed_up_down	0.990279	6.72542e-10	1
	Glyma.02G247100	12	Glyma.02G247100	Glyma.02G247100	mixed_up_down	Glyma.07G074400	15	Glyma.07G074400	Glyma.07G074400	mixed_up_down	0.991484	3.47643e-10	1
	Glyma.02G247100	12	Glyma.02G247100	Glyma.02G247100	mixed_up_down	Glyma.07G166400	12	Glyma.07G166400	Glyma.07G166400	mixed_up_down	0.994153	5.33125e-11	1
	Glyma.02G247100	12	Glyma.02G247100	Glyma.02G247100	mixed_up_down	Glyma.07G251200	6	Glyma.07G251200	Glyma.07G251200	mixed_up_down	0.996337	5.15965e-12	1
	Glyma.02G247100	12	Glyma.02G247100	Glyma.02G247100	mixed_up_down	Glyma.09G035700	11	Glyma.09G035700	Glyma.09G035700	mixed_up_down	0.992727	1.5832e-10	1
	Glyma.02G247100	12	Glyma.02G247100	Glyma.02G247100	mixed_up_down	Glyma.10G225400	12	Glyma.10G225400	Glyma.10G225400	mixed_up_down	0.995419	1.57667e-11	1
	Glyma.02G247100	12	Glyma.02G247100	Glyma.02G247100	mixed_up_down	Glyma.11G222100	8	Glyma.11G222100	Glyma.11G222100	mixed_up_down	0.993165	1.16154e-10	1
	Glyma.02G247100	12	Glyma.02G247100	Glyma.02G247100	mixed_up_down	Glyma.12G148900	11	Glyma.12G148900	Glyma.12G148900	mixed_up_down	0.991351	3.75764e-10	1
	Glyma.02G247100	12	Glyma.02G247100	Glyma.02G247100	mixed_up_down	Glyma.12G219300	10	Glyma.12G219300	Glyma.12G219300	down	0.997441	8.60201e-13	1
	Glyma.02G247100	12	Glyma.02G247100	Glyma.02G247100	mixed_up_down	Glyma.13G308200	16	Glyma.13G308200	Glyma.13G308200	mixed_up_down	0.992418	1.9478e-10	1
	Glyma.02G247100	12	Glyma.02G247100	Glyma.02G247100	mixed_up_down	Glyma.19G084200	10	Glyma.19G084200	Glyma.19G084200	mixed_up_down	0.99559	1.30345e-11	1
	Glyma.02G247100	12	Glyma.02G247100	Glyma.02G247100	mixed_up_down	XLOC_017898	11	XLOC_017898	XLOC_017898	mixed_up_down	0.990621	5.62599e-10	1
126	Glyma.02G249000	22	Glyma.02G249000	Glyma.02G249000	mixed_up_down	Glyma.06G272800	20	Glyma.06G272800	Glyma.06G272800	mixed_up_down	0.993558	8.64131e-11	1
	Glyma.02G249000	22	Glyma.02G249000	Glyma.02G249000	mixed_up_down	Glyma.09G219800	4	Glyma.09G219800	Glyma.09G219800	mixed_up_down	0.992075	2.42957e-10	1
	Glyma.02G249000	22	Glyma.02G249000	Glyma.02G249000	mixed_up_down	Glyma.10G031900	15	Glyma.10G031900	Glyma.10G031900	down	0.990085	7.4231e-10	1
	Glyma.02G249000	22	Glyma.02G249000	Glyma.02G249000	mixed_up_down	Glyma.13G226900	17	Glyma.13G226900	Glyma.13G226900	mixed_up_down	0.991148	4.21768e-10	1
	Glyma.02G249000	22	Glyma.02G249000	Glyma.02G249000	mixed_up_down	Glyma.14G050900	18	Glyma.14G050900	Glyma.14G050900	mixed_up_down	0.997977	2.66009e-13	1
	Glyma.02G249000	22	Glyma.02G249000	Glyma.02G249000	mixed_up_down	Glyma.14G189100	10	Glyma.14G189100	Glyma.14G189100	up	0.991051	4.45248e-10	1
	Glyma.02G249000	22	Glyma.02G249000	Glyma.02G249000	mixed_up_down	Glyma.17G115300	19	Glyma.17G115300	Glyma.17G115300	mixed_up_down	0.990851	4.97096e-10	1
	Glyma.02G249000	22	Glyma.02G249000	Glyma.02G249000	mixed_up_down	Glyma.19G097100	19	Glyma.19G097100	Glyma.19G097100	mixed_up_down	0.99253	1.80879e-10	1
	Glyma.02G249000	22	Glyma.02G249000	Glyma.02G249000	mixed_up_down	Glyma.19G114100	17	Glyma.19G114100	Glyma.19G114100	mixed_up_down	0.996631	3.39817e-12	1
	Glyma.02G249000	22	Glyma.02G249000	Glyma.02G249000	mixed_up_down	Glyma.19G239100	17	Glyma.19G239100	Glyma.19G239100	mixed_up_down	0.992672	1.64404e-10	1
	Glyma.02G249000	22	Glyma.02G249000	Glyma.02G249000	mixed_up_down	Glyma.20G142300	19	Glyma.20G142300	Glyma.20G142300	up	0.996534	3.91687e-12	1
	Glyma.02G249000	22	Glyma.02G249000	Glyma.02G249000	mixed_up_down	XLOC_009171	17	XLOC_009171	XLOC_009171	mixed_up_down	0.996201	6.19105e-12	1
	Glyma.02G249000	22	Glyma.02G249000	Glyma.02G249000	mixed_up_down	XLOC_009174	19	XLOC_009174	XLOC_009174	mixed_up_down	0.997811	3.94573e-13	1
	Glyma.02G249000	22	Glyma.02G249000	Glyma.02G249000	mixed_up_down	XLOC_009184	20	XLOC_009184	XLOC_009184	mixed_up_down	0.998116	1.86073e-13	1
	Glyma.02G249000	22	Glyma.02G249000	Glyma.02G249000	mixed_up_down	XLOC_019806	22	XLOC_019806	XLOC_019806	down	0.996807	2.60059e-12	1
	Glyma.02G249000	22	Glyma.02G249000	Glyma.02G249000	mixed_up_down	XLOC_032287	20	XLOC_032287	XLOC_032287	down	0.998798	1.9762e-14	1
	Glyma.02G249000	22	Glyma.02G249000	Glyma.02G249000	mixed_up_down	XLOC_032498	18	XLOC_032498	XLOC_032498	mixed_up_down	0.997621	5.973e-13	1
	Glyma.02G249000	22	Glyma.02G249000	Glyma.02G249000	mixed_up_down	XLOC_036385	18	XLOC_036385	XLOC_036385	mixed_up_down	0.997025	1.82743e-12	1
	Glyma.02G249000	22	Glyma.02G249000	Glyma.02G249000	mixed_up_down	XLOC_038494	17	XLOC_038494	XLOC_038494	down	0.99086	4.94736e-10	1
	Glyma.02G249600	10	Glyma.02G249600	Glyma.02G249600	down	Glyma.10G130200	6	Glyma.10G130200	Glyma.10G130200	mixed_up_down	0.991228	4.03136e-10	1
	Glyma.02G249600	10	Glyma.02G249600	Glyma.02G249600	down	Glyma.10G168100	10	Glyma.10G168100	Glyma.10G168100	mixed_up_down	0.992903	1.40098e-10	1
	Glyma.02G249600	10	Glyma.02G249600	Glyma.02G249600	down	Glyma.11G111100	9	Glyma.11G111100	Glyma.11G111100	mixed_up_down	0.992772	1.53447e-10	1
	Glyma.02G249600	10	Glyma.02G249600	Glyma.02G249600	down	Glyma.11G111400	9	Glyma.11G111400	Glyma.11G111400	mixed_up_down	0.999115	4.21885e-15	1
	Glyma.02G249600	10	Glyma.02G249600	Glyma.02G249600	down	Glyma.12G037400	9	Glyma.12G037400	Glyma.12G037400	mixed_up_down	0.990404	6.30497e-10	1
	Glyma.02G249600	10	Glyma.02G249600	Glyma.02G249600	down	Glyma.15G238900	12	Glyma.15G238900	Glyma.15G238900	mixed_up_down	0.996651	3.29736e-12	1
	Glyma.02G249600	10	Glyma.02G249600	Glyma.02G249600	down	Glyma.16G208300	10	Glyma.16G208300	Glyma.16G208300	mixed_up_down	0.996463	4.33231e-12	1
	Glyma.02G249600	10	Glyma.02G249600	Glyma.02G249600	down	Glyma.18G052600	9	Glyma.18G052600	Glyma.18G052600	mixed_up_down	0.994916	2.65157e-11	1
	Glyma.02G249600	10	Glyma.02G249600	Glyma.02G249600	down	Glyma.18G187600	9	Glyma.18G187600	Glyma.18G187600	mixed_up_down	0.991132	4.25511e-10	1
127	Glyma.02G253900	8	Glyma.02G253900	Glyma.02G253900	mixed_up_down	Glyma.03G179100	7	Glyma.03G179100	Glyma.03G179100	mixed_up_down	0.99824	1.32783e-13	1
	Glyma.02G253900	8	Glyma.02G253900	Glyma.02G253900	mixed_up_down	Glyma.08G109900	10	Glyma.08G109900	Glyma.08G109900	mixed_up_down	0.994315	4.63229e-11	1
	Glyma.02G253900	8	Glyma.02G253900	Glyma.02G253900	mixed_up_down	Glyma.11G060100	12	Glyma.11G060100	Glyma.11G060100	mixed_up_down	0.993548	8.70799e-11	1
	Glyma.02G253900	8	Glyma.02G253900	Glyma.02G253900	mixed_up_down	Glyma.12G114900	8	Glyma.12G114900	Glyma.12G114900	mixed_up_down	0.999364	8.88178e-16	1
	Glyma.02G253900	8	Glyma.02G253900	Glyma.02G253900	mixed_up_down	Glyma.14G011500	8	Glyma.14G011500	Glyma.14G011500	mixed_up_down	0.996433	4.51994e-12	1
	Glyma.02G253900	8	Glyma.02G253900	Glyma.02G253900	mixed_up_down	Glyma.16G150700	11	Glyma.16G150700	Glyma.16G150700	up	0.993685	7.82308e-11	1
	Glyma.02G253900	8	Glyma.02G253900	Glyma.02G253900	mixed_up_down	XLOC_038494	17	XLOC_038494	XLOC_038494	down	0.994476	4.01239e-11	1
128	Glyma.02G258600	4	Glyma.02G258600	Glyma.02G258600	mixed_up_down	Glyma.11G066500	8	Glyma.11G066500	Glyma.11G066500	mixed_up_down	0.995839	9.75398e-12	1
	Glyma.02G258600	4	Glyma.02G258600	Glyma.02G258600	mixed_up_down	Glyma.16G068900	4	Glyma.16G068900	Glyma.16G068900	mixed_up_down	0.997334	1.05604e-12	1
	Glyma.02G258600	4	Glyma.02G258600	Glyma.02G258600	mixed_up_down	Glyma.17G138500	2	Glyma.17G138500	Glyma.17G138500	mixed_up_down	0.990734	5.29711e-10	1
129	Glyma.02G265700	4	Glyma.02G265700	Glyma.02G265700	mixed_up_down	Glyma.08G055300	5	Glyma.08G055300	Glyma.08G055300	mixed_up_down	0.997654	5.56888e-13	1
	Glyma.02G265700	4	Glyma.02G265700	Glyma.02G265700	mixed_up_down	Glyma.11G067100	7	Glyma.11G067100	Glyma.11G067100	mixed_up_down	0.996063	7.3983e-12	1
	Glyma.02G265700	4	Glyma.02G265700	Glyma.02G265700	mixed_up_down	Glyma.12G178800	7	Glyma.12G178800	Glyma.12G178800	mixed_up_down	0.99537	1.66214e-11	1
	Glyma.02G265700	4	Glyma.02G265700	Glyma.02G265700	mixed_up_down	Glyma.17G047900	9	Glyma.17G047900	Glyma.17G047900	mixed_up_down	0.992971	1.33558e-10	1
130	Glyma.02G282100	14	Glyma.02G282100	Glyma.02G282100	mixed_up_down	Glyma.04G055800	13	Glyma.04G055800	Glyma.04G055800	mixed_up_down	0.995973	8.28404e-12	1
	Glyma.02G282100	14	Glyma.02G282100	Glyma.02G282100	mixed_up_down	Glyma.04G134100	3	Glyma.04G134100	Glyma.04G134100	down	0.990599	5.69217e-10	1
	Glyma.02G282100	14	Glyma.02G282100	Glyma.02G282100	mixed_up_down	Glyma.05G203000	14	Glyma.05G203000	Glyma.05G203000	mixed_up_down	0.997606	6.17284e-13	1
	Glyma.02G282100	14	Glyma.02G282100	Glyma.02G282100	mixed_up_down	Glyma.06G217900	12	Glyma.06G217900	Glyma.06G217900	mixed_up_down	0.99097	4.65718e-10	1
	Glyma.02G282100	14	Glyma.02G282100	Glyma.02G282100	mixed_up_down	Glyma.07G074400	15	Glyma.07G074400	Glyma.07G074400	mixed_up_down	0.990946	4.72068e-10	1
	Glyma.02G282100	14	Glyma.02G282100	Glyma.02G282100	mixed_up_down	Glyma.07G163300	13	Glyma.07G163300	Glyma.07G163300	mixed_up_down	0.990174	7.0962e-10	1
	Glyma.02G282100	14	Glyma.02G282100	Glyma.02G282100	mixed_up_down	Glyma.08G050500	12	Glyma.08G050500	Glyma.08G050500	mixed_up_down	0.993997	6.0802e-11	1
	Glyma.02G282100	14	Glyma.02G282100	Glyma.02G282100	mixed_up_down	Glyma.09G039000	8	Glyma.09G039000	Glyma.09G039000	mixed_up_down	0.996616	3.47633e-12	1
	Glyma.02G282100	14	Glyma.02G282100	Glyma.02G282100	mixed_up_down	Glyma.09G089600	12	Glyma.09G089600	Glyma.09G089600	mixed_up_down	0.994061	5.76219e-11	1
	Glyma.02G282100	14	Glyma.02G282100	Glyma.02G282100	mixed_up_down	Glyma.10G294100	3	Glyma.10G294100	Glyma.10G294100	mixed_up_down	0.991606	3.23587e-10	1
	Glyma.02G282100	14	Glyma.02G282100	Glyma.02G282100	mixed_up_down	Glyma.13G278600	14	Glyma.13G278600	Glyma.13G278600	mixed_up_down	0.993738	7.50366e-11	1
	Glyma.02G282100	14	Glyma.02G282100	Glyma.02G282100	mixed_up_down	Glyma.13G332200	9	Glyma.13G332200	Glyma.13G332200	down	0.991484	3.47698e-10	1
	Glyma.02G282100	14	Glyma.02G282100	Glyma.02G282100	mixed_up_down	Glyma.19G099500	13	Glyma.19G099500	Glyma.19G099500	mixed_up_down	0.992442	1.91775e-10	1
131	Glyma.02G283500	9	Glyma.02G283500	Glyma.02G283500	mixed_up_down	Glyma.07G028200	13	Glyma.07G028200	Glyma.07G028200	mixed_up_down	0.992362	2.02096e-10	1
	Glyma.02G283500	9	Glyma.02G283500	Glyma.02G283500	mixed_up_down	Glyma.07G166400	12	Glyma.07G166400	Glyma.07G166400	mixed_up_down	0.99322	1.11528e-10	1
	Glyma.02G283500	9	Glyma.02G283500	Glyma.02G283500	mixed_up_down	Glyma.13G308200	16	Glyma.13G308200	Glyma.13G308200	mixed_up_down	0.995061	2.29519e-11	1
	Glyma.02G283500	9	Glyma.02G283500	Glyma.02G283500	mixed_up_down	Glyma.17G015900	8	Glyma.17G015900	Glyma.17G015900	mixed_up_down	0.992042	2.48102e-10	1
	Glyma.02G283500	9	Glyma.02G283500	Glyma.02G283500	mixed_up_down	Glyma.20G187400	7	Glyma.20G187400	Glyma.20G187400	mixed_up_down	0.998718	2.70894e-14	1
	Glyma.02G283500	9	Glyma.02G283500	Glyma.02G283500	mixed_up_down	XLOC_042521	6	XLOC_042521	XLOC_042521	mixed_up_down	0.997542	7.04325e-13	1
132	Glyma.02G286900	3	Glyma.02G286900	Glyma.02G286900	mixed_up_down	Glyma.16G081700	2	Glyma.16G081700	Glyma.16G081700	mixed_up_down	0.995087	2.23552e-11	1
	Glyma.02G286900	3	Glyma.02G286900	Glyma.02G286900	mixed_up_down	Glyma.18G107300	19	Glyma.18G107300	Glyma.18G107300	mixed_up_down	0.990784	5.15439e-10	1
	Glyma.02G286900	3	Glyma.02G286900	Glyma.02G286900	mixed_up_down	XLOC_020484	5	XLOC_020484	XLOC_020484	mixed_up_down	0.990359	6.45617e-10	1
133	Glyma.02G291500	3	Glyma.02G291500	Glyma.02G291500	mixed_up_down	Glyma.06G147100	3	Glyma.06G147100	Glyma.06G147100	down	0.998185	1.54543e-13	1
	Glyma.02G291500	3	Glyma.02G291500	Glyma.02G291500	mixed_up_down	Glyma.11G087800	3	Glyma.11G087800	Glyma.11G087800	down	0.993913	6.51297e-11	1
	Glyma.02G291500	3	Glyma.02G291500	Glyma.02G291500	mixed_up_down	XLOC_047675	6	XLOC_047675	XLOC_047675	down	0.992165	2.29521e-10	1
134	Glyma.02G294900	3	Glyma.02G294900	Glyma.02G294900	mixed_up_down	Glyma.07G075100	11	Glyma.07G075100	Glyma.07G075100	mixed_up_down	0.990126	7.27038e-10	1
	Glyma.02G294900	3	Glyma.02G294900	Glyma.02G294900	mixed_up_down	Glyma.09G240200	8	Glyma.09G240200	Glyma.09G240200	mixed_up_down	0.991444	3.56058e-10	1
	Glyma.02G294900	3	Glyma.02G294900	Glyma.02G294900	mixed_up_down	Glyma.12G012800	2	Glyma.12G012800	Glyma.12G012800	mixed_up_down	0.998005	2.47802e-13	1
135	Glyma.02G299500	82	Glyma.02G299500	Glyma.02G299500	mixed_up_down	Glyma.03G049500	82	Glyma.03G049500	Glyma.03G049500	mixed_up_down	0.999973	0	1
	Glyma.02G299500	82	Glyma.02G299500	Glyma.02G299500	mixed_up_down	Glyma.03G094800	82	Glyma.03G094800	Glyma.03G094800	mixed_up_down	1	0	1
	Glyma.02G299500	82	Glyma.02G299500	Glyma.02G299500	mixed_up_down	Glyma.03G158600	84	Glyma.03G158600	Glyma.03G158600	mixed_up_down	0.999875	0	1
	Glyma.02G299500	82	Glyma.02G299500	Glyma.02G299500	mixed_up_down	Glyma.03G158700	80	Glyma.03G158700	Glyma.03G158700	down	0.994849	2.83173e-11	1
	Glyma.02G299500	82	Glyma.02G299500	Glyma.02G299500	mixed_up_down	Glyma.03G210700	82	Glyma.03G210700	Glyma.03G210700	mixed_up_down	0.998769	2.22045e-14	1
	Glyma.02G299500	82	Glyma.02G299500	Glyma.02G299500	mixed_up_down	Glyma.04G014000	46	Glyma.04G014000	Glyma.04G014000	up	0.992909	1.39524e-10	1
	Glyma.02G299500	82	Glyma.02G299500	Glyma.02G299500	mixed_up_down	Glyma.04G024400	66	Glyma.04G024400	Glyma.04G024400	mixed_up_down	0.994074	5.69835e-11	1
	Glyma.02G299500	82	Glyma.02G299500	Glyma.02G299500	mixed_up_down	Glyma.04G094800	82	Glyma.04G094800	Glyma.04G094800	mixed_up_down	1	0	1
	Glyma.02G299500	82	Glyma.02G299500	Glyma.02G299500	mixed_up_down	Glyma.05G037200	83	Glyma.05G037200	Glyma.05G037200	mixed_up_down	0.999546	0	1
	Glyma.02G299500	82	Glyma.02G299500	Glyma.02G299500	mixed_up_down	Glyma.05G056300	81	Glyma.05G056300	Glyma.05G056300	mixed_up_down	0.99553	1.39417e-11	1
	Glyma.02G299500	82	Glyma.02G299500	Glyma.02G299500	mixed_up_down	Glyma.05G109600	84	Glyma.05G109600	Glyma.05G109600	mixed_up_down	0.998929	1.11022e-14	1
	Glyma.02G299500	82	Glyma.02G299500	Glyma.02G299500	mixed_up_down	Glyma.05G126400	82	Glyma.05G126400	Glyma.05G126400	up	0.99991	0	1
	Glyma.02G299500	82	Glyma.02G299500	Glyma.02G299500	mixed_up_down	Glyma.05G186300	81	Glyma.05G186300	Glyma.05G186300	mixed_up_down	0.99808	2.04725e-13	1
	Glyma.02G299500	82	Glyma.02G299500	Glyma.02G299500	mixed_up_down	Glyma.05G197900	82	Glyma.05G197900	Glyma.05G197900	up	0.999889	0	1
	Glyma.02G299500	82	Glyma.02G299500	Glyma.02G299500	mixed_up_down	Glyma.06G006800	82	Glyma.06G006800	Glyma.06G006800	mixed_up_down	0.999489	2.22045e-16	1
	Glyma.02G299500	82	Glyma.02G299500	Glyma.02G299500	mixed_up_down	Glyma.06G282200	84	Glyma.06G282200	Glyma.06G282200	mixed_up_down	0.999922	0	1
	Glyma.02G299500	82	Glyma.02G299500	Glyma.02G299500	mixed_up_down	Glyma.06G282400	82	Glyma.06G282400	Glyma.06G282400	mixed_up_down	0.999972	0	1
	Glyma.02G299500	82	Glyma.02G299500	Glyma.02G299500	mixed_up_down	Glyma.06G282500	83	Glyma.06G282500	Glyma.06G282500	mixed_up_down	0.999631	0	1
	Glyma.02G299500	82	Glyma.02G299500	Glyma.02G299500	mixed_up_down	Glyma.06G282600	82	Glyma.06G282600	Glyma.06G282600	mixed_up_down	0.999995	0	1
	Glyma.02G299500	82	Glyma.02G299500	Glyma.02G299500	mixed_up_down	Glyma.06G282700	84	Glyma.06G282700	Glyma.06G282700	mixed_up_down	0.998461	6.79456e-14	1
	Glyma.02G299500	82	Glyma.02G299500	Glyma.02G299500	mixed_up_down	Glyma.06G282900	82	Glyma.06G282900	Glyma.06G282900	up	1	0	1
	Glyma.02G299500	82	Glyma.02G299500	Glyma.02G299500	mixed_up_down	Glyma.06G283800	61	Glyma.06G283800	Glyma.06G283800	mixed_up_down	0.992291	2.1164e-10	1
	Glyma.02G299500	82	Glyma.02G299500	Glyma.02G299500	mixed_up_down	Glyma.06G306900	80	Glyma.06G306900	Glyma.06G306900	mixed_up_down	0.995805	1.01628e-11	1
	Glyma.02G299500	82	Glyma.02G299500	Glyma.02G299500	mixed_up_down	Glyma.08G009900	82	Glyma.08G009900	Glyma.08G009900	mixed_up_down	0.997554	6.86562e-13	1
	Glyma.02G299500	82	Glyma.02G299500	Glyma.02G299500	mixed_up_down	Glyma.08G155400	82	Glyma.08G155400	Glyma.08G155400	mixed_up_down	1	0	1
	Glyma.02G299500	82	Glyma.02G299500	Glyma.02G299500	mixed_up_down	Glyma.08G155500	82	Glyma.08G155500	Glyma.08G155500	mixed_up_down	1	0	1
	Glyma.02G299500	82	Glyma.02G299500	Glyma.02G299500	mixed_up_down	Glyma.08G155700	85	Glyma.08G155700	Glyma.08G155700	mixed_up_down	0.999138	3.77476e-15	1
	Glyma.02G299500	82	Glyma.02G299500	Glyma.02G299500	mixed_up_down	Glyma.08G232200	84	Glyma.08G232200	Glyma.08G232200	mixed_up_down	0.999807	0	1
	Glyma.02G299500	82	Glyma.02G299500	Glyma.02G299500	mixed_up_down	Glyma.08G328600	80	Glyma.08G328600	Glyma.08G328600	mixed_up_down	0.997747	4.55636e-13	1
	Glyma.02G299500	82	Glyma.02G299500	Glyma.02G299500	mixed_up_down	Glyma.08G342300	82	Glyma.08G342300	Glyma.08G342300	mixed_up_down	1	0	1
	Glyma.02G299500	82	Glyma.02G299500	Glyma.02G299500	mixed_up_down	Glyma.09G087400	71	Glyma.09G087400	Glyma.09G087400	up	0.994946	2.57527e-11	1
	Glyma.02G299500	82	Glyma.02G299500	Glyma.02G299500	mixed_up_down	Glyma.09G117900	74	Glyma.09G117900	Glyma.09G117900	down	0.997257	1.21703e-12	1
	Glyma.02G299500	82	Glyma.02G299500	Glyma.02G299500	mixed_up_down	Glyma.09G221800	82	Glyma.09G221800	Glyma.09G221800	mixed_up_down	0.999961	0	1
	Glyma.02G299500	82	Glyma.02G299500	Glyma.02G299500	mixed_up_down	Glyma.10G017000	82	Glyma.10G017000	Glyma.10G017000	mixed_up_down	1	0	1
	Glyma.02G299500	82	Glyma.02G299500	Glyma.02G299500	mixed_up_down	Glyma.10G056300	77	Glyma.10G056300	Glyma.10G056300	mixed_up_down	0.994866	2.78393e-11	1
	Glyma.02G299500	82	Glyma.02G299500	Glyma.02G299500	mixed_up_down	Glyma.10G296600	84	Glyma.10G296600	Glyma.10G296600	mixed_up_down	0.999777	0	1
	Glyma.02G299500	82	Glyma.02G299500	Glyma.02G299500	mixed_up_down	Glyma.11G119000	62	Glyma.11G119000	Glyma.11G119000	up	0.993264	1.08014e-10	1
	Glyma.02G299500	82	Glyma.02G299500	Glyma.02G299500	mixed_up_down	Glyma.11G120600	82	Glyma.11G120600	Glyma.11G120600	mixed_up_down	0.999489	2.22045e-16	1
	Glyma.02G299500	82	Glyma.02G299500	Glyma.02G299500	mixed_up_down	Glyma.11G179100	82	Glyma.11G179100	Glyma.11G179100	mixed_up_down	0.999601	0	1
	Glyma.02G299500	82	Glyma.02G299500	Glyma.02G299500	mixed_up_down	Glyma.11G238000	81	Glyma.11G238000	Glyma.11G238000	mixed_up_down	0.997702	5.02931e-13	1
	Glyma.02G299500	82	Glyma.02G299500	Glyma.02G299500	mixed_up_down	Glyma.12G122300	83	Glyma.12G122300	Glyma.12G122300	up	0.998822	1.77636e-14	1
	Glyma.02G299500	82	Glyma.02G299500	Glyma.02G299500	mixed_up_down	Glyma.12G124100	82	Glyma.12G124100	Glyma.12G124100	mixed_up_down	1	0	1
	Glyma.02G299500	82	Glyma.02G299500	Glyma.02G299500	mixed_up_down	Glyma.12G124200	82	Glyma.12G124200	Glyma.12G124200	mixed_up_down	1	0	1
	Glyma.02G299500	82	Glyma.02G299500	Glyma.02G299500	mixed_up_down	Glyma.12G124900	82	Glyma.12G124900	Glyma.12G124900	mixed_up_down	1	0	1
	Glyma.02G299500	82	Glyma.02G299500	Glyma.02G299500	mixed_up_down	Glyma.13G091400	82	Glyma.13G091400	Glyma.13G091400	mixed_up_down	1	0	1
	Glyma.02G299500	82	Glyma.02G299500	Glyma.02G299500	mixed_up_down	Glyma.13G165000	85	Glyma.13G165000	Glyma.13G165000	mixed_up_down	0.998654	3.4639e-14	1
	Glyma.02G299500	82	Glyma.02G299500	Glyma.02G299500	mixed_up_down	Glyma.13G218300	81	Glyma.13G218300	Glyma.13G218300	mixed_up_down	0.999547	0	1
	Glyma.02G299500	82	Glyma.02G299500	Glyma.02G299500	mixed_up_down	Glyma.13G240500	83	Glyma.13G240500	Glyma.13G240500	down	0.999781	0	1
	Glyma.02G299500	82	Glyma.02G299500	Glyma.02G299500	mixed_up_down	Glyma.13G319700	84	Glyma.13G319700	Glyma.13G319700	mixed_up_down	0.999791	0	1
	Glyma.02G299500	82	Glyma.02G299500	Glyma.02G299500	mixed_up_down	Glyma.14G014200	78	Glyma.14G014200	Glyma.14G014200	mixed_up_down	0.994779	3.0286e-11	1
	Glyma.02G299500	82	Glyma.02G299500	Glyma.02G299500	mixed_up_down	Glyma.14G176500	66	Glyma.14G176500	Glyma.14G176500	mixed_up_down	0.99661	3.50542e-12	1
	Glyma.02G299500	82	Glyma.02G299500	Glyma.02G299500	mixed_up_down	Glyma.15G066200	82	Glyma.15G066200	Glyma.15G066200	mixed_up_down	1	0	1
	Glyma.02G299500	82	Glyma.02G299500	Glyma.02G299500	mixed_up_down	Glyma.15G140200	76	Glyma.15G140200	Glyma.15G140200	mixed_up_down	0.993779	7.25966e-11	1
	Glyma.02G299500	82	Glyma.02G299500	Glyma.02G299500	mixed_up_down	Glyma.15G238600	84	Glyma.15G238600	Glyma.15G238600	up	0.999025	6.88338e-15	1
	Glyma.02G299500	82	Glyma.02G299500	Glyma.02G299500	mixed_up_down	Glyma.16G043500	78	Glyma.16G043500	Glyma.16G043500	mixed_up_down	0.996512	4.04166e-12	1
	Glyma.02G299500	82	Glyma.02G299500	Glyma.02G299500	mixed_up_down	Glyma.16G079500	82	Glyma.16G079500	Glyma.16G079500	mixed_up_down	0.998184	1.54987e-13	1
	Glyma.02G299500	82	Glyma.02G299500	Glyma.02G299500	mixed_up_down	Glyma.16G129600	76	Glyma.16G129600	Glyma.16G129600	mixed_up_down	0.994012	6.00462e-11	1
	Glyma.02G299500	82	Glyma.02G299500	Glyma.02G299500	mixed_up_down	Glyma.17G008500	66	Glyma.17G008500	Glyma.17G008500	down	0.994462	4.0659e-11	1
	Glyma.02G299500	82	Glyma.02G299500	Glyma.02G299500	mixed_up_down	Glyma.17G027300	82	Glyma.17G027300	Glyma.17G027300	mixed_up_down	0.999902	0	1
	Glyma.02G299500	82	Glyma.02G299500	Glyma.02G299500	mixed_up_down	Glyma.17G036100	65	Glyma.17G036100	Glyma.17G036100	mixed_up_down	0.996256	5.75584e-12	1
	Glyma.02G299500	82	Glyma.02G299500	Glyma.02G299500	mixed_up_down	Glyma.17G106100	84	Glyma.17G106100	Glyma.17G106100	mixed_up_down	0.99782	3.86358e-13	1
	Glyma.02G299500	82	Glyma.02G299500	Glyma.02G299500	mixed_up_down	Glyma.17G139400	82	Glyma.17G139400	Glyma.17G139400	mixed_up_down	0.999987	0	1
	Glyma.02G299500	82	Glyma.02G299500	Glyma.02G299500	mixed_up_down	Glyma.17G157400	83	Glyma.17G157400	Glyma.17G157400	mixed_up_down	0.999597	0	1
	Glyma.02G299500	82	Glyma.02G299500	Glyma.02G299500	mixed_up_down	Glyma.17G252400	62	Glyma.17G252400	Glyma.17G252400	mixed_up_down	0.992684	1.63098e-10	1
	Glyma.02G299500	82	Glyma.02G299500	Glyma.02G299500	mixed_up_down	Glyma.18G019300	75	Glyma.18G019300	Glyma.18G019300	mixed_up_down	0.992648	1.67039e-10	1
	Glyma.02G299500	82	Glyma.02G299500	Glyma.02G299500	mixed_up_down	Glyma.18G054000	82	Glyma.18G054000	Glyma.18G054000	up	0.999954	0	1
	Glyma.02G299500	82	Glyma.02G299500	Glyma.02G299500	mixed_up_down	Glyma.18G215100	85	Glyma.18G215100	Glyma.18G215100	mixed_up_down	0.999514	2.22045e-16	1
	Glyma.02G299500	82	Glyma.02G299500	Glyma.02G299500	mixed_up_down	Glyma.18G225000	82	Glyma.18G225000	Glyma.18G225000	mixed_up_down	0.999995	0	1
	Glyma.02G299500	82	Glyma.02G299500	Glyma.02G299500	mixed_up_down	Glyma.19G019600	82	Glyma.19G019600	Glyma.19G019600	mixed_up_down	0.996395	4.76552e-12	1
	Glyma.02G299500	82	Glyma.02G299500	Glyma.02G299500	mixed_up_down	Glyma.19G161100	84	Glyma.19G161100	Glyma.19G161100	down	0.998157	1.66755e-13	1
	Glyma.02G299500	82	Glyma.02G299500	Glyma.02G299500	mixed_up_down	Glyma.20G034100	81	Glyma.20G034100	Glyma.20G034100	mixed_up_down	0.999203	2.66454e-15	1
	Glyma.02G299500	82	Glyma.02G299500	Glyma.02G299500	mixed_up_down	Glyma.20G246300	83	Glyma.20G246300	Glyma.20G246300	mixed_up_down	0.999442	4.44089e-16	1
	Glyma.02G299500	82	Glyma.02G299500	Glyma.02G299500	mixed_up_down	Glyma.20G247400	84	Glyma.20G247400	Glyma.20G247400	mixed_up_down	0.999908	0	1
	Glyma.02G299500	82	Glyma.02G299500	Glyma.02G299500	mixed_up_down	XLOC_001320	76	XLOC_001320	XLOC_001320	down	0.995613	1.26996e-11	1
	Glyma.02G299500	82	Glyma.02G299500	Glyma.02G299500	mixed_up_down	XLOC_029029	82	XLOC_029029	XLOC_029029	mixed_up_down	1	0	1
136	Glyma.02G301200	5	Glyma.02G301200	Glyma.02G301200	mixed_up_down	Glyma.03G030900	7	Glyma.03G030900	Glyma.03G030900	mixed_up_down	0.99691	2.20712e-12	1
	Glyma.02G301200	5	Glyma.02G301200	Glyma.02G301200	mixed_up_down	Glyma.06G247100	9	Glyma.06G247100	Glyma.06G247100	mixed_up_down	0.995075	2.2635e-11	1
	Glyma.02G301200	5	Glyma.02G301200	Glyma.02G301200	mixed_up_down	Glyma.08G299600	4	Glyma.08G299600	Glyma.08G299600	mixed_up_down	0.996568	3.72857e-12	1
	Glyma.02G301200	5	Glyma.02G301200	Glyma.02G301200	mixed_up_down	Glyma.17G073200	10	Glyma.17G073200	Glyma.17G073200	mixed_up_down	0.991036	4.48956e-10	1
	Glyma.02G301200	5	Glyma.02G301200	Glyma.02G301200	mixed_up_down	XLOC_029095	7	XLOC_029095	XLOC_029095	mixed_up_down	0.991493	3.45926e-10	1
137	Glyma.02G307400	11	Glyma.02G307400	Glyma.02G307400	mixed_up_down	Glyma.06G149700	10	Glyma.06G149700	Glyma.06G149700	mixed_up_down	0.991815	2.85357e-10	1
	Glyma.02G307400	11	Glyma.02G307400	Glyma.02G307400	mixed_up_down	Glyma.06G163000	12	Glyma.06G163000	Glyma.06G163000	mixed_up_down	0.990551	5.83954e-10	1
	Glyma.02G307400	11	Glyma.02G307400	Glyma.02G307400	mixed_up_down	Glyma.09G041800	13	Glyma.09G041800	Glyma.09G041800	mixed_up_down	0.995015	2.40399e-11	1
	Glyma.02G307400	11	Glyma.02G307400	Glyma.02G307400	mixed_up_down	Glyma.09G095200	9	Glyma.09G095200	Glyma.09G095200	down	0.995457	1.51235e-11	1
	Glyma.02G307400	11	Glyma.02G307400	Glyma.02G307400	mixed_up_down	Glyma.12G020400	12	Glyma.12G020400	Glyma.12G020400	mixed_up_down	0.990283	6.71359e-10	1
	Glyma.02G307400	11	Glyma.02G307400	Glyma.02G307400	mixed_up_down	Glyma.12G148900	11	Glyma.12G148900	Glyma.12G148900	mixed_up_down	0.995036	2.35378e-11	1
	Glyma.02G307400	11	Glyma.02G307400	Glyma.02G307400	mixed_up_down	Glyma.19G019500	10	Glyma.19G019500	Glyma.19G019500	down	0.992412	1.95578e-10	1
	Glyma.02G307400	11	Glyma.02G307400	Glyma.02G307400	mixed_up_down	Glyma.U016600	13	Glyma.U016600	Glyma.U016600	mixed_up_down	0.99426	4.85831e-11	1
	Glyma.02G307400	11	Glyma.02G307400	Glyma.02G307400	mixed_up_down	Glyma.U032600	12	Glyma.U032600	Glyma.U032600	down	0.996705	3.04157e-12	1
	Glyma.02G307400	11	Glyma.02G307400	Glyma.02G307400	mixed_up_down	XLOC_019823	15	XLOC_019823	XLOC_019823	mixed_up_down	0.99234	2.05003e-10	1
	Glyma.02G307400	11	Glyma.02G307400	Glyma.02G307400	mixed_up_down	XLOC_036643	10	XLOC_036643	XLOC_036643	mixed_up_down	0.994733	3.16422e-11	1
138	Glyma.03G002700	1	Glyma.03G002700	Glyma.03G002700	mixed_up_down	Glyma.09G160900	1	Glyma.09G160900	Glyma.09G160900	mixed_up_down	0.993991	6.11027e-11	1
139	Glyma.03G005300	9	Glyma.03G005300	Glyma.03G005300	down	Glyma.06G258200	10	Glyma.06G258200	Glyma.06G258200	mixed_up_down	0.997193	1.36557e-12	1
	Glyma.03G005300	9	Glyma.03G005300	Glyma.03G005300	down	Glyma.08G236000	3	Glyma.08G236000	Glyma.08G236000	down	0.990066	7.495e-10	1
	Glyma.03G005300	9	Glyma.03G005300	Glyma.03G005300	down	Glyma.15G010600	9	Glyma.15G010600	Glyma.15G010600	mixed_up_down	0.992742	1.56706e-10	1
	Glyma.03G005300	9	Glyma.03G005300	Glyma.03G005300	down	Glyma.17G115600	3	Glyma.17G115600	Glyma.17G115600	mixed_up_down	0.993575	8.5272e-11	1
	Glyma.03G005300	9	Glyma.03G005300	Glyma.03G005300	down	Glyma.18G006000	2	Glyma.18G006000	Glyma.18G006000	mixed_up_down	0.995463	1.50167e-11	1
	Glyma.03G005300	9	Glyma.03G005300	Glyma.03G005300	down	Glyma.18G214200	7	Glyma.18G214200	Glyma.18G214200	mixed_up_down	0.993064	1.24939e-10	1
	Glyma.03G005300	9	Glyma.03G005300	Glyma.03G005300	down	Glyma.20G023100	11	Glyma.20G023100	Glyma.20G023100	mixed_up_down	0.991444	3.55897e-10	1
	Glyma.03G005300	9	Glyma.03G005300	Glyma.03G005300	down	Glyma.U032600	12	Glyma.U032600	Glyma.U032600	down	0.992319	2.0787e-10	1
	Glyma.03G005300	9	Glyma.03G005300	Glyma.03G005300	down	XLOC_036643	10	XLOC_036643	XLOC_036643	mixed_up_down	0.992544	1.79235e-10	1
140	Glyma.03G006600	10	Glyma.03G006600	Glyma.03G006600	mixed_up_down	Glyma.03G131100	4	Glyma.03G131100	Glyma.03G131100	mixed_up_down	0.991764	2.94305e-10	1
	Glyma.03G006600	10	Glyma.03G006600	Glyma.03G006600	mixed_up_down	Glyma.06G055900	10	Glyma.06G055900	Glyma.06G055900	mixed_up_down	0.991468	3.50992e-10	1
	Glyma.03G006600	10	Glyma.03G006600	Glyma.03G006600	mixed_up_down	Glyma.06G105500	8	Glyma.06G105500	Glyma.06G105500	mixed_up_down	0.990793	5.13167e-10	1
	Glyma.03G006600	10	Glyma.03G006600	Glyma.03G006600	mixed_up_down	Glyma.08G174700	12	Glyma.08G174700	Glyma.08G174700	mixed_up_down	0.99941	4.44089e-16	1
	Glyma.03G006600	10	Glyma.03G006600	Glyma.03G006600	mixed_up_down	Glyma.13G223000	10	Glyma.13G223000	Glyma.13G223000	mixed_up_down	0.998618	3.95239e-14	1
	Glyma.03G006600	10	Glyma.03G006600	Glyma.03G006600	mixed_up_down	Glyma.15G101800	16	Glyma.15G101800	Glyma.15G101800	mixed_up_down	0.996784	2.69251e-12	1
	Glyma.03G006600	10	Glyma.03G006600	Glyma.03G006600	mixed_up_down	Glyma.15G194300	14	Glyma.15G194300	Glyma.15G194300	down	0.995132	2.1362e-11	1
	Glyma.03G006600	10	Glyma.03G006600	Glyma.03G006600	mixed_up_down	Glyma.17G006100	15	Glyma.17G006100	Glyma.17G006100	mixed_up_down	0.996381	4.85767e-12	1
	Glyma.03G006600	10	Glyma.03G006600	Glyma.03G006600	mixed_up_down	Glyma.18G066000	14	Glyma.18G066000	Glyma.18G066000	mixed_up_down	0.996688	3.12195e-12	1
	Glyma.03G006600	10	Glyma.03G006600	Glyma.03G006600	mixed_up_down	Glyma.18G218700	21	Glyma.18G218700	Glyma.18G218700	mixed_up_down	0.990891	4.86453e-10	1
141	Glyma.03G008000	3	Glyma.03G008000	Glyma.03G008000	mixed_up_down	Glyma.03G240700	1	Glyma.03G240700	Glyma.03G240700	up	0.992654	1.66451e-10	1
	Glyma.03G008000	3	Glyma.03G008000	Glyma.03G008000	mixed_up_down	Glyma.10G000500	2	Glyma.10G000500	Glyma.10G000500	mixed_up_down	0.990334	6.53992e-10	1
	Glyma.03G008000	3	Glyma.03G008000	Glyma.03G008000	mixed_up_down	Glyma.10G207100	1	Glyma.10G207100	Glyma.10G207100	mixed_up_down	0.991632	3.18631e-10	1
142	Glyma.03G008400	8	Glyma.03G008400	Glyma.03G008400	mixed_up_down	Glyma.04G056000	20	Glyma.04G056000	Glyma.04G056000	up	0.990843	4.99349e-10	1
	Glyma.03G008400	8	Glyma.03G008400	Glyma.03G008400	mixed_up_down	Glyma.04G240000	20	Glyma.04G240000	Glyma.04G240000	mixed_up_down	0.990586	5.73172e-10	1
	Glyma.03G008400	8	Glyma.03G008400	Glyma.03G008400	mixed_up_down	Glyma.06G131300	13	Glyma.06G131300	Glyma.06G131300	mixed_up_down	0.992915	1.38961e-10	1
	Glyma.03G008400	8	Glyma.03G008400	Glyma.03G008400	mixed_up_down	Glyma.08G304200	6	Glyma.08G304200	Glyma.08G304200	mixed_up_down	0.993047	1.26463e-10	1
	Glyma.03G008400	8	Glyma.03G008400	Glyma.03G008400	mixed_up_down	Glyma.11G102300	24	Glyma.11G102300	Glyma.11G102300	mixed_up_down	0.99287	1.43344e-10	1
	Glyma.03G008400	8	Glyma.03G008400	Glyma.03G008400	mixed_up_down	Glyma.12G021500	14	Glyma.12G021500	Glyma.12G021500	mixed_up_down	0.996714	3.0016e-12	1
	Glyma.03G008400	8	Glyma.03G008400	Glyma.03G008400	mixed_up_down	Glyma.20G214000	20	Glyma.20G214000	Glyma.20G214000	mixed_up_down	0.991761	2.94853e-10	1
143	Glyma.03G014000	11	Glyma.03G014000	Glyma.03G014000	mixed_up_down	Glyma.04G196500	11	Glyma.04G196500	Glyma.04G196500	mixed_up_down	0.991612	3.22494e-10	1
	Glyma.03G014000	11	Glyma.03G014000	Glyma.03G014000	mixed_up_down	Glyma.04G233500	20	Glyma.04G233500	Glyma.04G233500	mixed_up_down	0.993634	8.14737e-11	1
	Glyma.03G014000	11	Glyma.03G014000	Glyma.03G014000	mixed_up_down	Glyma.05G192600	15	Glyma.05G192600	Glyma.05G192600	mixed_up_down	0.995841	9.73532e-12	1
	Glyma.03G014000	11	Glyma.03G014000	Glyma.03G014000	mixed_up_down	Glyma.05G200500	18	Glyma.05G200500	Glyma.05G200500	mixed_up_down	0.994635	3.46962e-11	1
	Glyma.03G014000	11	Glyma.03G014000	Glyma.03G014000	mixed_up_down	Glyma.06G195200	13	Glyma.06G195200	Glyma.06G195200	mixed_up_down	0.997578	6.54143e-13	1
	Glyma.03G014000	11	Glyma.03G014000	Glyma.03G014000	mixed_up_down	Glyma.08G213000	17	Glyma.08G213000	Glyma.08G213000	mixed_up_down	0.990571	5.77805e-10	1
	Glyma.03G014000	11	Glyma.03G014000	Glyma.03G014000	mixed_up_down	Glyma.08G336100	14	Glyma.08G336100	Glyma.08G336100	mixed_up_down	0.993248	1.09282e-10	1
	Glyma.03G014000	11	Glyma.03G014000	Glyma.03G014000	mixed_up_down	Glyma.16G189100	9	Glyma.16G189100	Glyma.16G189100	mixed_up_down	0.993218	1.1168e-10	1
	Glyma.03G014000	11	Glyma.03G014000	Glyma.03G014000	mixed_up_down	Glyma.17G059100	6	Glyma.17G059100	Glyma.17G059100	mixed_up_down	0.995433	1.55231e-11	1
	Glyma.03G014000	11	Glyma.03G014000	Glyma.03G014000	mixed_up_down	XLOC_032722	7	XLOC_032722	XLOC_032722	mixed_up_down	0.995575	1.32636e-11	1
144	Glyma.03G014300	16	Glyma.03G014300	Glyma.03G014300	mixed_up_down	Glyma.05G002000	12	Glyma.05G002000	Glyma.05G002000	mixed_up_down	0.990028	7.63569e-10	1
	Glyma.03G014300	16	Glyma.03G014300	Glyma.03G014300	mixed_up_down	Glyma.05G148700	20	Glyma.05G148700	Glyma.05G148700	mixed_up_down	0.996638	3.36353e-12	1
	Glyma.03G014300	16	Glyma.03G014300	Glyma.03G014300	mixed_up_down	Glyma.06G047400	20	Glyma.06G047400	Glyma.06G047400	mixed_up_down	0.995429	1.5588e-11	1
	Glyma.03G014300	16	Glyma.03G014300	Glyma.03G014300	mixed_up_down	Glyma.08G158200	12	Glyma.08G158200	Glyma.08G158200	mixed_up_down	0.990624	5.61819e-10	1
	Glyma.03G014300	16	Glyma.03G014300	Glyma.03G014300	mixed_up_down	Glyma.08G249200	15	Glyma.08G249200	Glyma.08G249200	mixed_up_down	0.995511	1.42468e-11	1
	Glyma.03G014300	16	Glyma.03G014300	Glyma.03G014300	mixed_up_down	Glyma.10G263400	16	Glyma.10G263400	Glyma.10G263400	mixed_up_down	0.991382	3.69097e-10	1
	Glyma.03G014300	16	Glyma.03G014300	Glyma.03G014300	mixed_up_down	Glyma.12G021300	16	Glyma.12G021300	Glyma.12G021300	mixed_up_down	0.995241	1.90652e-11	1
	Glyma.03G014300	16	Glyma.03G014300	Glyma.03G014300	mixed_up_down	Glyma.12G143000	8	Glyma.12G143000	Glyma.12G143000	mixed_up_down	0.990126	7.26909e-10	1
	Glyma.03G014300	16	Glyma.03G014300	Glyma.03G014300	mixed_up_down	Glyma.14G029100	17	Glyma.14G029100	Glyma.14G029100	mixed_up_down	0.996413	4.6505e-12	1
	Glyma.03G014300	16	Glyma.03G014300	Glyma.03G014300	mixed_up_down	Glyma.14G067000	17	Glyma.14G067000	Glyma.14G067000	mixed_up_down	0.997098	1.61382e-12	1
	Glyma.03G014300	16	Glyma.03G014300	Glyma.03G014300	mixed_up_down	Glyma.14G106700	14	Glyma.14G106700	Glyma.14G106700	mixed_up_down	0.993702	7.72382e-11	1
	Glyma.03G014300	16	Glyma.03G014300	Glyma.03G014300	mixed_up_down	Glyma.15G021300	18	Glyma.15G021300	Glyma.15G021300	mixed_up_down	0.99662	3.45546e-12	1
	Glyma.03G014300	16	Glyma.03G014300	Glyma.03G014300	mixed_up_down	Glyma.16G115800	11	Glyma.16G115800	Glyma.16G115800	mixed_up_down	0.990315	6.60271e-10	1
	Glyma.03G014300	16	Glyma.03G014300	Glyma.03G014300	mixed_up_down	Glyma.19G015000	20	Glyma.19G015000	Glyma.19G015000	mixed_up_down	0.990412	6.27862e-10	1
	Glyma.03G014300	16	Glyma.03G014300	Glyma.03G014300	mixed_up_down	Glyma.19G187300	11	Glyma.19G187300	Glyma.19G187300	mixed_up_down	0.99018	7.07348e-10	1
145	Glyma.03G015000	1	Glyma.03G015000	Glyma.03G015000	down	Glyma.05G007100	2	Glyma.05G007100	Glyma.05G007100	mixed_up_down	0.996238	5.8975e-12	1
146	Glyma.03G016600	6	Glyma.03G016600	Glyma.03G016600	mixed_up_down	Glyma.08G074000	12	Glyma.08G074000	Glyma.08G074000	mixed_up_down	0.994651	3.417e-11	1
	Glyma.03G016600	6	Glyma.03G016600	Glyma.03G016600	mixed_up_down	Glyma.08G135000	16	Glyma.08G135000	Glyma.08G135000	mixed_up_down	0.990891	4.86414e-10	1
	Glyma.03G016600	6	Glyma.03G016600	Glyma.03G016600	mixed_up_down	Glyma.19G149200	4	Glyma.19G149200	Glyma.19G149200	mixed_up_down	0.99233	2.06424e-10	1
	Glyma.03G016600	6	Glyma.03G016600	Glyma.03G016600	mixed_up_down	Glyma.20G002400	4	Glyma.20G002400	Glyma.20G002400	mixed_up_down	0.990959	4.68654e-10	1
	Glyma.03G016600	6	Glyma.03G016600	Glyma.03G016600	mixed_up_down	Glyma.20G007200	6	Glyma.20G007200	Glyma.20G007200	mixed_up_down	0.995861	9.50084e-12	1
	Glyma.03G016600	6	Glyma.03G016600	Glyma.03G016600	mixed_up_down	Glyma.20G149700	5	Glyma.20G149700	Glyma.20G149700	mixed_up_down	0.998178	1.57652e-13	1
147	Glyma.03G017800	1	Glyma.03G017800	Glyma.03G017800	mixed_up_down	Glyma.15G154900	1	Glyma.15G154900	Glyma.15G154900	up	0.994634	3.47082e-11	1
148	Glyma.03G027200	8	Glyma.03G027200	Glyma.03G027200	down	Glyma.03G221100	7	Glyma.03G221100	Glyma.03G221100	mixed_up_down	0.997442	8.58424e-13	1
	Glyma.03G027200	8	Glyma.03G027200	Glyma.03G027200	down	Glyma.03G262200	6	Glyma.03G262200	Glyma.03G262200	mixed_up_down	0.991434	3.58029e-10	1
	Glyma.03G027200	8	Glyma.03G027200	Glyma.03G027200	down	Glyma.06G163000	12	Glyma.06G163000	Glyma.06G163000	mixed_up_down	0.990801	5.10796e-10	1
	Glyma.03G027200	8	Glyma.03G027200	Glyma.03G027200	down	Glyma.09G041800	13	Glyma.09G041800	Glyma.09G041800	mixed_up_down	0.990047	7.56602e-10	1
	Glyma.03G027200	8	Glyma.03G027200	Glyma.03G027200	down	Glyma.12G100500	5	Glyma.12G100500	Glyma.12G100500	mixed_up_down	0.991673	3.10969e-10	1
	Glyma.03G027200	8	Glyma.03G027200	Glyma.03G027200	down	Glyma.13G233400	3	Glyma.13G233400	Glyma.13G233400	mixed_up_down	0.993617	8.25318e-11	1
	Glyma.03G027200	8	Glyma.03G027200	Glyma.03G027200	down	Glyma.16G180900	8	Glyma.16G180900	Glyma.16G180900	mixed_up_down	0.993848	6.86646e-11	1
149	Glyma.03G029000	7	Glyma.03G029000	Glyma.03G029000	mixed_up_down	Glyma.05G009000	6	Glyma.05G009000	Glyma.05G009000	mixed_up_down	0.995397	1.6144e-11	1
	Glyma.03G029000	7	Glyma.03G029000	Glyma.03G029000	mixed_up_down	Glyma.05G191100	7	Glyma.05G191100	Glyma.05G191100	mixed_up_down	0.993773	7.29794e-11	1
	Glyma.03G029000	7	Glyma.03G029000	Glyma.03G029000	mixed_up_down	Glyma.08G156300	9	Glyma.08G156300	Glyma.08G156300	mixed_up_down	0.995329	1.73663e-11	1
	Glyma.03G029000	7	Glyma.03G029000	Glyma.03G029000	mixed_up_down	Glyma.09G163100	9	Glyma.09G163100	Glyma.09G163100	mixed_up_down	0.993403	9.7355e-11	1
	Glyma.03G029000	7	Glyma.03G029000	Glyma.03G029000	mixed_up_down	Glyma.13G101500	8	Glyma.13G101500	Glyma.13G101500	mixed_up_down	0.992758	1.54968e-10	1
	Glyma.03G029000	7	Glyma.03G029000	Glyma.03G029000	mixed_up_down	Glyma.18G290400	3	Glyma.18G290400	Glyma.18G290400	mixed_up_down	0.990081	7.43663e-10	1
	Glyma.03G029000	7	Glyma.03G029000	Glyma.03G029000	mixed_up_down	XLOC_011413	7	XLOC_011413	XLOC_011413	mixed_up_down	0.99213	2.34608e-10	1
150	Glyma.03G030900	7	Glyma.03G030900	Glyma.03G030900	mixed_up_down	Glyma.04G158800	9	Glyma.04G158800	Glyma.04G158800	mixed_up_down	0.991674	3.1066e-10	1
	Glyma.03G030900	7	Glyma.03G030900	Glyma.03G030900	mixed_up_down	Glyma.06G247100	9	Glyma.06G247100	Glyma.06G247100	mixed_up_down	0.994433	4.17311e-11	1
	Glyma.03G030900	7	Glyma.03G030900	Glyma.03G030900	mixed_up_down	Glyma.08G299600	4	Glyma.08G299600	Glyma.08G299600	mixed_up_down	0.993985	6.13689e-11	1
	Glyma.03G030900	7	Glyma.03G030900	Glyma.03G030900	mixed_up_down	Glyma.17G073200	10	Glyma.17G073200	Glyma.17G073200	mixed_up_down	0.997001	1.90181e-12	1
	Glyma.03G030900	7	Glyma.03G030900	Glyma.03G030900	mixed_up_down	XLOC_029095	7	XLOC_029095	XLOC_029095	mixed_up_down	0.992016	2.52103e-10	1
151	Glyma.03G032300	6	Glyma.03G032300	Glyma.03G032300	mixed_up_down	Glyma.04G064500	7	Glyma.04G064500	Glyma.04G064500	mixed_up_down	0.99602	7.81464e-12	1
	Glyma.03G032300	6	Glyma.03G032300	Glyma.03G032300	mixed_up_down	Glyma.05G075100	6	Glyma.05G075100	Glyma.05G075100	mixed_up_down	0.992315	2.08415e-10	1
	Glyma.03G032300	6	Glyma.03G032300	Glyma.03G032300	mixed_up_down	Glyma.12G072900	2	Glyma.12G072900	Glyma.12G072900	mixed_up_down	0.995313	1.76748e-11	1
	Glyma.03G032300	6	Glyma.03G032300	Glyma.03G032300	mixed_up_down	Glyma.14G060300	1	Glyma.14G060300	Glyma.14G060300	mixed_up_down	0.992339	2.05179e-10	1
	Glyma.03G032300	6	Glyma.03G032300	Glyma.03G032300	mixed_up_down	XLOC_040803	7	XLOC_040803	XLOC_040803	mixed_up_down	0.994267	4.82983e-11	1
152	Glyma.03G033900	1	Glyma.03G033900	Glyma.03G033900	mixed_up_down	Glyma.06G169100	1	Glyma.06G169100	Glyma.06G169100	mixed_up_down	0.993881	6.68736e-11	1
153	Glyma.03G049500	82	Glyma.03G049500	Glyma.03G049500	mixed_up_down	Glyma.03G094800	82	Glyma.03G094800	Glyma.03G094800	mixed_up_down	0.999973	0	1
	Glyma.03G049500	82	Glyma.03G049500	Glyma.03G049500	mixed_up_down	Glyma.03G158600	84	Glyma.03G158600	Glyma.03G158600	mixed_up_down	0.999834	0	1
	Glyma.03G049500	82	Glyma.03G049500	Glyma.03G049500	mixed_up_down	Glyma.03G158700	80	Glyma.03G158700	Glyma.03G158700	down	0.994733	3.16323e-11	1
	Glyma.03G049500	82	Glyma.03G049500	Glyma.03G049500	mixed_up_down	Glyma.03G210700	82	Glyma.03G210700	Glyma.03G210700	mixed_up_down	0.99869	3.01981e-14	1
	Glyma.03G049500	82	Glyma.03G049500	Glyma.03G049500	mixed_up_down	Glyma.04G014000	46	Glyma.04G014000	Glyma.04G014000	up	0.99298	1.32738e-10	1
	Glyma.03G049500	82	Glyma.03G049500	Glyma.03G049500	mixed_up_down	Glyma.04G024400	66	Glyma.04G024400	Glyma.04G024400	mixed_up_down	0.99473	3.17366e-11	1
	Glyma.03G049500	82	Glyma.03G049500	Glyma.03G049500	mixed_up_down	Glyma.04G094800	82	Glyma.04G094800	Glyma.04G094800	mixed_up_down	0.999973	0	1
	Glyma.03G049500	82	Glyma.03G049500	Glyma.03G049500	mixed_up_down	Glyma.05G037200	83	Glyma.05G037200	Glyma.05G037200	mixed_up_down	0.999488	2.22045e-16	1
	Glyma.03G049500	82	Glyma.03G049500	Glyma.03G049500	mixed_up_down	Glyma.05G056300	81	Glyma.05G056300	Glyma.05G056300	mixed_up_down	0.995393	1.62148e-11	1
	Glyma.03G049500	82	Glyma.03G049500	Glyma.03G049500	mixed_up_down	Glyma.05G109600	84	Glyma.05G109600	Glyma.05G109600	mixed_up_down	0.998861	1.5099e-14	1
	Glyma.03G049500	82	Glyma.03G049500	Glyma.03G049500	mixed_up_down	Glyma.05G126400	82	Glyma.05G126400	Glyma.05G126400	up	0.999874	0	1
	Glyma.03G049500	82	Glyma.03G049500	Glyma.03G049500	mixed_up_down	Glyma.05G186300	81	Glyma.05G186300	Glyma.05G186300	mixed_up_down	0.997978	2.65121e-13	1
	Glyma.03G049500	82	Glyma.03G049500	Glyma.03G049500	mixed_up_down	Glyma.05G197900	82	Glyma.05G197900	Glyma.05G197900	up	0.999931	0	1
	Glyma.03G049500	82	Glyma.03G049500	Glyma.03G049500	mixed_up_down	Glyma.06G006800	82	Glyma.06G006800	Glyma.06G006800	mixed_up_down	0.999585	0	1
	Glyma.03G049500	82	Glyma.03G049500	Glyma.03G049500	mixed_up_down	Glyma.06G282200	84	Glyma.06G282200	Glyma.06G282200	mixed_up_down	0.999976	0	1
	Glyma.03G049500	82	Glyma.03G049500	Glyma.03G049500	mixed_up_down	Glyma.06G282400	82	Glyma.06G282400	Glyma.06G282400	mixed_up_down	0.99994	0	1
	Glyma.03G049500	82	Glyma.03G049500	Glyma.03G049500	mixed_up_down	Glyma.06G282500	83	Glyma.06G282500	Glyma.06G282500	mixed_up_down	0.999584	0	1
	Glyma.03G049500	82	Glyma.03G049500	Glyma.03G049500	mixed_up_down	Glyma.06G282600	82	Glyma.06G282600	Glyma.06G282600	mixed_up_down	0.999966	0	1
	Glyma.03G049500	82	Glyma.03G049500	Glyma.03G049500	mixed_up_down	Glyma.06G282700	84	Glyma.06G282700	Glyma.06G282700	mixed_up_down	0.998394	8.39329e-14	1
	Glyma.03G049500	82	Glyma.03G049500	Glyma.03G049500	mixed_up_down	Glyma.06G282900	82	Glyma.06G282900	Glyma.06G282900	up	0.999973	0	1
	Glyma.03G049500	82	Glyma.03G049500	Glyma.03G049500	mixed_up_down	Glyma.06G283800	61	Glyma.06G283800	Glyma.06G283800	mixed_up_down	0.99314	1.18255e-10	1
	Glyma.03G049500	82	Glyma.03G049500	Glyma.03G049500	mixed_up_down	Glyma.06G306900	80	Glyma.06G306900	Glyma.06G306900	mixed_up_down	0.99586	9.50973e-12	1
	Glyma.03G049500	82	Glyma.03G049500	Glyma.03G049500	mixed_up_down	Glyma.08G009900	82	Glyma.08G009900	Glyma.08G009900	mixed_up_down	0.997453	8.41105e-13	1
	Glyma.03G049500	82	Glyma.03G049500	Glyma.03G049500	mixed_up_down	Glyma.08G155400	82	Glyma.08G155400	Glyma.08G155400	mixed_up_down	0.999973	0	1
	Glyma.03G049500	82	Glyma.03G049500	Glyma.03G049500	mixed_up_down	Glyma.08G155500	82	Glyma.08G155500	Glyma.08G155500	mixed_up_down	0.999973	0	1
	Glyma.03G049500	82	Glyma.03G049500	Glyma.03G049500	mixed_up_down	Glyma.08G155700	85	Glyma.08G155700	Glyma.08G155700	mixed_up_down	0.99907	5.32907e-15	1
	Glyma.03G049500	82	Glyma.03G049500	Glyma.03G049500	mixed_up_down	Glyma.08G232200	84	Glyma.08G232200	Glyma.08G232200	mixed_up_down	0.999761	0	1
	Glyma.03G049500	82	Glyma.03G049500	Glyma.03G049500	mixed_up_down	Glyma.08G328600	80	Glyma.08G328600	Glyma.08G328600	mixed_up_down	0.997629	5.87308e-13	1
	Glyma.03G049500	82	Glyma.03G049500	Glyma.03G049500	mixed_up_down	Glyma.08G342300	82	Glyma.08G342300	Glyma.08G342300	mixed_up_down	0.999973	0	1
	Glyma.03G049500	82	Glyma.03G049500	Glyma.03G049500	mixed_up_down	Glyma.09G087400	71	Glyma.09G087400	Glyma.09G087400	up	0.995193	2.00608e-11	1
	Glyma.03G049500	82	Glyma.03G049500	Glyma.03G049500	mixed_up_down	Glyma.09G117900	74	Glyma.09G117900	Glyma.09G117900	down	0.997567	6.68798e-13	1
	Glyma.03G049500	82	Glyma.03G049500	Glyma.03G049500	mixed_up_down	Glyma.09G221800	82	Glyma.09G221800	Glyma.09G221800	mixed_up_down	0.999928	0	1
	Glyma.03G049500	82	Glyma.03G049500	Glyma.03G049500	mixed_up_down	Glyma.10G017000	82	Glyma.10G017000	Glyma.10G017000	mixed_up_down	0.999973	0	1
	Glyma.03G049500	82	Glyma.03G049500	Glyma.03G049500	mixed_up_down	Glyma.10G056300	77	Glyma.10G056300	Glyma.10G056300	mixed_up_down	0.994731	3.16951e-11	1
	Glyma.03G049500	82	Glyma.03G049500	Glyma.03G049500	mixed_up_down	Glyma.10G296600	84	Glyma.10G296600	Glyma.10G296600	mixed_up_down	0.999773	0	1
	Glyma.03G049500	82	Glyma.03G049500	Glyma.03G049500	mixed_up_down	Glyma.11G119000	62	Glyma.11G119000	Glyma.11G119000	up	0.993848	6.86613e-11	1
	Glyma.03G049500	82	Glyma.03G049500	Glyma.03G049500	mixed_up_down	Glyma.11G120600	82	Glyma.11G120600	Glyma.11G120600	mixed_up_down	0.999426	4.44089e-16	1
	Glyma.03G049500	82	Glyma.03G049500	Glyma.03G049500	mixed_up_down	Glyma.11G179100	82	Glyma.11G179100	Glyma.11G179100	mixed_up_down	0.999564	0	1
	Glyma.03G049500	82	Glyma.03G049500	Glyma.03G049500	mixed_up_down	Glyma.11G238000	81	Glyma.11G238000	Glyma.11G238000	mixed_up_down	0.997626	5.91971e-13	1
	Glyma.03G049500	82	Glyma.03G049500	Glyma.03G049500	mixed_up_down	Glyma.12G122300	83	Glyma.12G122300	Glyma.12G122300	up	0.998808	1.88738e-14	1
	Glyma.03G049500	82	Glyma.03G049500	Glyma.03G049500	mixed_up_down	Glyma.12G124100	82	Glyma.12G124100	Glyma.12G124100	mixed_up_down	0.999973	0	1
	Glyma.03G049500	82	Glyma.03G049500	Glyma.03G049500	mixed_up_down	Glyma.12G124200	82	Glyma.12G124200	Glyma.12G124200	mixed_up_down	0.999973	0	1
	Glyma.03G049500	82	Glyma.03G049500	Glyma.03G049500	mixed_up_down	Glyma.12G124900	82	Glyma.12G124900	Glyma.12G124900	mixed_up_down	0.999973	0	1
	Glyma.03G049500	82	Glyma.03G049500	Glyma.03G049500	mixed_up_down	Glyma.13G091400	82	Glyma.13G091400	Glyma.13G091400	mixed_up_down	0.999973	0	1
	Glyma.03G049500	82	Glyma.03G049500	Glyma.03G049500	mixed_up_down	Glyma.13G165000	85	Glyma.13G165000	Glyma.13G165000	mixed_up_down	0.998636	3.73035e-14	1
	Glyma.03G049500	82	Glyma.03G049500	Glyma.03G049500	mixed_up_down	Glyma.13G218300	81	Glyma.13G218300	Glyma.13G218300	mixed_up_down	0.999593	0	1
	Glyma.03G049500	82	Glyma.03G049500	Glyma.03G049500	mixed_up_down	Glyma.13G240500	83	Glyma.13G240500	Glyma.13G240500	down	0.999725	0	1
	Glyma.03G049500	82	Glyma.03G049500	Glyma.03G049500	mixed_up_down	Glyma.13G319700	84	Glyma.13G319700	Glyma.13G319700	mixed_up_down	0.999749	0	1
	Glyma.03G049500	82	Glyma.03G049500	Glyma.03G049500	mixed_up_down	Glyma.14G014200	78	Glyma.14G014200	Glyma.14G014200	mixed_up_down	0.994788	3.00371e-11	1
	Glyma.03G049500	82	Glyma.03G049500	Glyma.03G049500	mixed_up_down	Glyma.14G176500	66	Glyma.14G176500	Glyma.14G176500	mixed_up_down	0.996477	4.24771e-12	1
	Glyma.03G049500	82	Glyma.03G049500	Glyma.03G049500	mixed_up_down	Glyma.15G066200	82	Glyma.15G066200	Glyma.15G066200	mixed_up_down	0.999973	0	1
	Glyma.03G049500	82	Glyma.03G049500	Glyma.03G049500	mixed_up_down	Glyma.15G140200	76	Glyma.15G140200	Glyma.15G140200	mixed_up_down	0.993664	7.95886e-11	1
	Glyma.03G049500	82	Glyma.03G049500	Glyma.03G049500	mixed_up_down	Glyma.15G238600	84	Glyma.15G238600	Glyma.15G238600	up	0.998966	9.32587e-15	1
	Glyma.03G049500	82	Glyma.03G049500	Glyma.03G049500	mixed_up_down	Glyma.16G043500	78	Glyma.16G043500	Glyma.16G043500	mixed_up_down	0.996631	3.39928e-12	1
	Glyma.03G049500	82	Glyma.03G049500	Glyma.03G049500	mixed_up_down	Glyma.16G079500	82	Glyma.16G079500	Glyma.16G079500	mixed_up_down	0.998101	1.94067e-13	1
	Glyma.03G049500	82	Glyma.03G049500	Glyma.03G049500	mixed_up_down	Glyma.16G129600	76	Glyma.16G129600	Glyma.16G129600	mixed_up_down	0.993827	6.9861e-11	1
	Glyma.03G049500	82	Glyma.03G049500	Glyma.03G049500	mixed_up_down	Glyma.17G008500	66	Glyma.17G008500	Glyma.17G008500	down	0.994697	3.27447e-11	1
	Glyma.03G049500	82	Glyma.03G049500	Glyma.03G049500	mixed_up_down	Glyma.17G027300	82	Glyma.17G027300	Glyma.17G027300	mixed_up_down	0.999865	0	1
	Glyma.03G049500	82	Glyma.03G049500	Glyma.03G049500	mixed_up_down	Glyma.17G036100	65	Glyma.17G036100	Glyma.17G036100	mixed_up_down	0.996211	6.11466e-12	1
	Glyma.03G049500	82	Glyma.03G049500	Glyma.03G049500	mixed_up_down	Glyma.17G106100	84	Glyma.17G106100	Glyma.17G106100	mixed_up_down	0.997722	4.81393e-13	1
	Glyma.03G049500	82	Glyma.03G049500	Glyma.03G049500	mixed_up_down	Glyma.17G139400	82	Glyma.17G139400	Glyma.17G139400	mixed_up_down	0.999957	0	1
	Glyma.03G049500	82	Glyma.03G049500	Glyma.03G049500	mixed_up_down	Glyma.17G157400	83	Glyma.17G157400	Glyma.17G157400	mixed_up_down	0.999545	0	1
	Glyma.03G049500	82	Glyma.03G049500	Glyma.03G049500	mixed_up_down	Glyma.17G252400	62	Glyma.17G252400	Glyma.17G252400	mixed_up_down	0.99354	8.76756e-11	1
	Glyma.03G049500	82	Glyma.03G049500	Glyma.03G049500	mixed_up_down	Glyma.18G019300	75	Glyma.18G019300	Glyma.18G019300	mixed_up_down	0.992425	1.93922e-10	1
	Glyma.03G049500	82	Glyma.03G049500	Glyma.03G049500	mixed_up_down	Glyma.18G054000	82	Glyma.18G054000	Glyma.18G054000	up	0.999968	0	1
	Glyma.03G049500	82	Glyma.03G049500	Glyma.03G049500	mixed_up_down	Glyma.18G215100	85	Glyma.18G215100	Glyma.18G215100	mixed_up_down	0.999447	4.44089e-16	1
	Glyma.03G049500	82	Glyma.03G049500	Glyma.03G049500	mixed_up_down	Glyma.18G225000	82	Glyma.18G225000	Glyma.18G225000	mixed_up_down	0.999966	0	1
	Glyma.03G049500	82	Glyma.03G049500	Glyma.03G049500	mixed_up_down	Glyma.19G019600	82	Glyma.19G019600	Glyma.19G019600	mixed_up_down	0.996321	5.27223e-12	1
	Glyma.03G049500	82	Glyma.03G049500	Glyma.03G049500	mixed_up_down	Glyma.19G161100	84	Glyma.19G161100	Glyma.19G161100	down	0.998087	2.01172e-13	1
	Glyma.03G049500	82	Glyma.03G049500	Glyma.03G049500	mixed_up_down	Glyma.20G034100	81	Glyma.20G034100	Glyma.20G034100	mixed_up_down	0.999148	3.55271e-15	1
	Glyma.03G049500	82	Glyma.03G049500	Glyma.03G049500	mixed_up_down	Glyma.20G246300	83	Glyma.20G246300	Glyma.20G246300	mixed_up_down	0.99938	6.66134e-16	1
	Glyma.03G049500	82	Glyma.03G049500	Glyma.03G049500	mixed_up_down	Glyma.20G247400	84	Glyma.20G247400	Glyma.20G247400	mixed_up_down	0.999969	0	1
	Glyma.03G049500	82	Glyma.03G049500	Glyma.03G049500	mixed_up_down	XLOC_001320	76	XLOC_001320	XLOC_001320	down	0.99552	1.41016e-11	1
	Glyma.03G049500	82	Glyma.03G049500	Glyma.03G049500	mixed_up_down	XLOC_029029	82	XLOC_029029	XLOC_029029	mixed_up_down	0.999973	0	1
154	Glyma.03G051100	2	Glyma.03G051100	Glyma.03G051100	up	Glyma.10G200500	2	Glyma.10G200500	Glyma.10G200500	mixed_up_down	0.996219	6.04961e-12	1
	Glyma.03G051100	2	Glyma.03G051100	Glyma.03G051100	up	Glyma.17G079900	2	Glyma.17G079900	Glyma.17G079900	mixed_up_down	0.993679	7.86575e-11	1
155	Glyma.03G054800	1	Glyma.03G054800	Glyma.03G054800	mixed_up_down	XLOC_006710	1	XLOC_006710	XLOC_006710	mixed_up_down	0.990519	5.93697e-10	1
156	Glyma.03G063000	1	Glyma.03G063000	Glyma.03G063000	up	Glyma.19G106700	1	Glyma.19G106700	Glyma.19G106700	up	0.990913	4.80502e-10	1
157	Glyma.03G063200	1	Glyma.03G063200	Glyma.03G063200	mixed_up_down	XLOC_004538	1	XLOC_004538	XLOC_004538	down	0.992176	2.27907e-10	1
158	Glyma.03G067800	1	Glyma.03G067800	Glyma.03G067800	up	Glyma.07G259800	1	Glyma.07G259800	Glyma.07G259800	mixed_up_down	0.99576	1.07105e-11	1
159	Glyma.03G081900	4	Glyma.03G081900	Glyma.03G081900	mixed_up_down	Glyma.05G147200	12	Glyma.05G147200	Glyma.05G147200	mixed_up_down	0.998119	1.85185e-13	1
	Glyma.03G081900	4	Glyma.03G081900	Glyma.03G081900	mixed_up_down	Glyma.10G168100	10	Glyma.10G168100	Glyma.10G168100	mixed_up_down	0.995347	1.70481e-11	1
	Glyma.03G081900	4	Glyma.03G081900	Glyma.03G081900	mixed_up_down	Glyma.16G027200	11	Glyma.16G027200	Glyma.16G027200	mixed_up_down	0.996018	7.83085e-12	1
160	Glyma.03G084500	5	Glyma.03G084500	Glyma.03G084500	mixed_up_down	Glyma.04G147100	6	Glyma.04G147100	Glyma.04G147100	mixed_up_down	0.992881	1.42304e-10	1
	Glyma.03G084500	5	Glyma.03G084500	Glyma.03G084500	mixed_up_down	Glyma.08G070800	7	Glyma.08G070800	Glyma.08G070800	mixed_up_down	0.997946	2.86882e-13	1
	Glyma.03G084500	5	Glyma.03G084500	Glyma.03G084500	mixed_up_down	Glyma.12G143000	8	Glyma.12G143000	Glyma.12G143000	mixed_up_down	0.996351	5.06106e-12	1
	Glyma.03G084500	5	Glyma.03G084500	Glyma.03G084500	mixed_up_down	Glyma.13G120500	14	Glyma.13G120500	Glyma.13G120500	down	0.995362	1.67644e-11	1
161	Glyma.03G094800	82	Glyma.03G094800	Glyma.03G094800	mixed_up_down	Glyma.03G158600	84	Glyma.03G158600	Glyma.03G158600	mixed_up_down	0.999875	0	1
	Glyma.03G094800	82	Glyma.03G094800	Glyma.03G094800	mixed_up_down	Glyma.03G158700	80	Glyma.03G158700	Glyma.03G158700	down	0.994849	2.83173e-11	1
	Glyma.03G094800	82	Glyma.03G094800	Glyma.03G094800	mixed_up_down	Glyma.03G210700	82	Glyma.03G210700	Glyma.03G210700	mixed_up_down	0.998769	2.22045e-14	1
	Glyma.03G094800	82	Glyma.03G094800	Glyma.03G094800	mixed_up_down	Glyma.04G014000	46	Glyma.04G014000	Glyma.04G014000	up	0.992909	1.39524e-10	1
	Glyma.03G094800	82	Glyma.03G094800	Glyma.03G094800	mixed_up_down	Glyma.04G024400	66	Glyma.04G024400	Glyma.04G024400	mixed_up_down	0.994074	5.69835e-11	1
	Glyma.03G094800	82	Glyma.03G094800	Glyma.03G094800	mixed_up_down	Glyma.04G094800	82	Glyma.04G094800	Glyma.04G094800	mixed_up_down	1	0	1
	Glyma.03G094800	82	Glyma.03G094800	Glyma.03G094800	mixed_up_down	Glyma.05G037200	83	Glyma.05G037200	Glyma.05G037200	mixed_up_down	0.999546	0	1
	Glyma.03G094800	82	Glyma.03G094800	Glyma.03G094800	mixed_up_down	Glyma.05G056300	81	Glyma.05G056300	Glyma.05G056300	mixed_up_down	0.99553	1.39417e-11	1
	Glyma.03G094800	82	Glyma.03G094800	Glyma.03G094800	mixed_up_down	Glyma.05G109600	84	Glyma.05G109600	Glyma.05G109600	mixed_up_down	0.998929	1.11022e-14	1
	Glyma.03G094800	82	Glyma.03G094800	Glyma.03G094800	mixed_up_down	Glyma.05G126400	82	Glyma.05G126400	Glyma.05G126400	up	0.99991	0	1
	Glyma.03G094800	82	Glyma.03G094800	Glyma.03G094800	mixed_up_down	Glyma.05G186300	81	Glyma.05G186300	Glyma.05G186300	mixed_up_down	0.99808	2.04725e-13	1
	Glyma.03G094800	82	Glyma.03G094800	Glyma.03G094800	mixed_up_down	Glyma.05G197900	82	Glyma.05G197900	Glyma.05G197900	up	0.999889	0	1
	Glyma.03G094800	82	Glyma.03G094800	Glyma.03G094800	mixed_up_down	Glyma.06G006800	82	Glyma.06G006800	Glyma.06G006800	mixed_up_down	0.999489	2.22045e-16	1
	Glyma.03G094800	82	Glyma.03G094800	Glyma.03G094800	mixed_up_down	Glyma.06G282200	84	Glyma.06G282200	Glyma.06G282200	mixed_up_down	0.999922	0	1
	Glyma.03G094800	82	Glyma.03G094800	Glyma.03G094800	mixed_up_down	Glyma.06G282400	82	Glyma.06G282400	Glyma.06G282400	mixed_up_down	0.999972	0	1
	Glyma.03G094800	82	Glyma.03G094800	Glyma.03G094800	mixed_up_down	Glyma.06G282500	83	Glyma.06G282500	Glyma.06G282500	mixed_up_down	0.999631	0	1
	Glyma.03G094800	82	Glyma.03G094800	Glyma.03G094800	mixed_up_down	Glyma.06G282600	82	Glyma.06G282600	Glyma.06G282600	mixed_up_down	0.999995	0	1
	Glyma.03G094800	82	Glyma.03G094800	Glyma.03G094800	mixed_up_down	Glyma.06G282700	84	Glyma.06G282700	Glyma.06G282700	mixed_up_down	0.998461	6.79456e-14	1
	Glyma.03G094800	82	Glyma.03G094800	Glyma.03G094800	mixed_up_down	Glyma.06G282900	82	Glyma.06G282900	Glyma.06G282900	up	1	0	1
	Glyma.03G094800	82	Glyma.03G094800	Glyma.03G094800	mixed_up_down	Glyma.06G283800	61	Glyma.06G283800	Glyma.06G283800	mixed_up_down	0.992291	2.1164e-10	1
	Glyma.03G094800	82	Glyma.03G094800	Glyma.03G094800	mixed_up_down	Glyma.06G306900	80	Glyma.06G306900	Glyma.06G306900	mixed_up_down	0.995805	1.01628e-11	1
	Glyma.03G094800	82	Glyma.03G094800	Glyma.03G094800	mixed_up_down	Glyma.08G009900	82	Glyma.08G009900	Glyma.08G009900	mixed_up_down	0.997554	6.86562e-13	1
	Glyma.03G094800	82	Glyma.03G094800	Glyma.03G094800	mixed_up_down	Glyma.08G155400	82	Glyma.08G155400	Glyma.08G155400	mixed_up_down	1	0	1
	Glyma.03G094800	82	Glyma.03G094800	Glyma.03G094800	mixed_up_down	Glyma.08G155500	82	Glyma.08G155500	Glyma.08G155500	mixed_up_down	1	0	1
	Glyma.03G094800	82	Glyma.03G094800	Glyma.03G094800	mixed_up_down	Glyma.08G155700	85	Glyma.08G155700	Glyma.08G155700	mixed_up_down	0.999138	3.77476e-15	1
	Glyma.03G094800	82	Glyma.03G094800	Glyma.03G094800	mixed_up_down	Glyma.08G232200	84	Glyma.08G232200	Glyma.08G232200	mixed_up_down	0.999807	0	1
	Glyma.03G094800	82	Glyma.03G094800	Glyma.03G094800	mixed_up_down	Glyma.08G328600	80	Glyma.08G328600	Glyma.08G328600	mixed_up_down	0.997747	4.55636e-13	1
	Glyma.03G094800	82	Glyma.03G094800	Glyma.03G094800	mixed_up_down	Glyma.08G342300	82	Glyma.08G342300	Glyma.08G342300	mixed_up_down	1	0	1
	Glyma.03G094800	82	Glyma.03G094800	Glyma.03G094800	mixed_up_down	Glyma.09G087400	71	Glyma.09G087400	Glyma.09G087400	up	0.994946	2.57527e-11	1
	Glyma.03G094800	82	Glyma.03G094800	Glyma.03G094800	mixed_up_down	Glyma.09G117900	74	Glyma.09G117900	Glyma.09G117900	down	0.997257	1.21703e-12	1
	Glyma.03G094800	82	Glyma.03G094800	Glyma.03G094800	mixed_up_down	Glyma.09G221800	82	Glyma.09G221800	Glyma.09G221800	mixed_up_down	0.999961	0	1
	Glyma.03G094800	82	Glyma.03G094800	Glyma.03G094800	mixed_up_down	Glyma.10G017000	82	Glyma.10G017000	Glyma.10G017000	mixed_up_down	1	0	1
	Glyma.03G094800	82	Glyma.03G094800	Glyma.03G094800	mixed_up_down	Glyma.10G056300	77	Glyma.10G056300	Glyma.10G056300	mixed_up_down	0.994866	2.78393e-11	1
	Glyma.03G094800	82	Glyma.03G094800	Glyma.03G094800	mixed_up_down	Glyma.10G296600	84	Glyma.10G296600	Glyma.10G296600	mixed_up_down	0.999777	0	1
	Glyma.03G094800	82	Glyma.03G094800	Glyma.03G094800	mixed_up_down	Glyma.11G119000	62	Glyma.11G119000	Glyma.11G119000	up	0.993264	1.08014e-10	1
	Glyma.03G094800	82	Glyma.03G094800	Glyma.03G094800	mixed_up_down	Glyma.11G120600	82	Glyma.11G120600	Glyma.11G120600	mixed_up_down	0.999489	2.22045e-16	1
	Glyma.03G094800	82	Glyma.03G094800	Glyma.03G094800	mixed_up_down	Glyma.11G179100	82	Glyma.11G179100	Glyma.11G179100	mixed_up_down	0.999601	0	1
	Glyma.03G094800	82	Glyma.03G094800	Glyma.03G094800	mixed_up_down	Glyma.11G238000	81	Glyma.11G238000	Glyma.11G238000	mixed_up_down	0.997702	5.02931e-13	1
	Glyma.03G094800	82	Glyma.03G094800	Glyma.03G094800	mixed_up_down	Glyma.12G122300	83	Glyma.12G122300	Glyma.12G122300	up	0.998822	1.77636e-14	1
	Glyma.03G094800	82	Glyma.03G094800	Glyma.03G094800	mixed_up_down	Glyma.12G124100	82	Glyma.12G124100	Glyma.12G124100	mixed_up_down	1	0	1
	Glyma.03G094800	82	Glyma.03G094800	Glyma.03G094800	mixed_up_down	Glyma.12G124200	82	Glyma.12G124200	Glyma.12G124200	mixed_up_down	1	0	1
	Glyma.03G094800	82	Glyma.03G094800	Glyma.03G094800	mixed_up_down	Glyma.12G124900	82	Glyma.12G124900	Glyma.12G124900	mixed_up_down	1	0	1
	Glyma.03G094800	82	Glyma.03G094800	Glyma.03G094800	mixed_up_down	Glyma.13G091400	82	Glyma.13G091400	Glyma.13G091400	mixed_up_down	1	0	1
	Glyma.03G094800	82	Glyma.03G094800	Glyma.03G094800	mixed_up_down	Glyma.13G165000	85	Glyma.13G165000	Glyma.13G165000	mixed_up_down	0.998654	3.4639e-14	1
	Glyma.03G094800	82	Glyma.03G094800	Glyma.03G094800	mixed_up_down	Glyma.13G218300	81	Glyma.13G218300	Glyma.13G218300	mixed_up_down	0.999547	0	1
	Glyma.03G094800	82	Glyma.03G094800	Glyma.03G094800	mixed_up_down	Glyma.13G240500	83	Glyma.13G240500	Glyma.13G240500	down	0.999781	0	1
	Glyma.03G094800	82	Glyma.03G094800	Glyma.03G094800	mixed_up_down	Glyma.13G319700	84	Glyma.13G319700	Glyma.13G319700	mixed_up_down	0.999791	0	1
	Glyma.03G094800	82	Glyma.03G094800	Glyma.03G094800	mixed_up_down	Glyma.14G014200	78	Glyma.14G014200	Glyma.14G014200	mixed_up_down	0.994779	3.0286e-11	1
	Glyma.03G094800	82	Glyma.03G094800	Glyma.03G094800	mixed_up_down	Glyma.14G176500	66	Glyma.14G176500	Glyma.14G176500	mixed_up_down	0.99661	3.50542e-12	1
	Glyma.03G094800	82	Glyma.03G094800	Glyma.03G094800	mixed_up_down	Glyma.15G066200	82	Glyma.15G066200	Glyma.15G066200	mixed_up_down	1	0	1
	Glyma.03G094800	82	Glyma.03G094800	Glyma.03G094800	mixed_up_down	Glyma.15G140200	76	Glyma.15G140200	Glyma.15G140200	mixed_up_down	0.993779	7.25966e-11	1
	Glyma.03G094800	82	Glyma.03G094800	Glyma.03G094800	mixed_up_down	Glyma.15G238600	84	Glyma.15G238600	Glyma.15G238600	up	0.999025	6.88338e-15	1
	Glyma.03G094800	82	Glyma.03G094800	Glyma.03G094800	mixed_up_down	Glyma.16G043500	78	Glyma.16G043500	Glyma.16G043500	mixed_up_down	0.996512	4.04166e-12	1
	Glyma.03G094800	82	Glyma.03G094800	Glyma.03G094800	mixed_up_down	Glyma.16G079500	82	Glyma.16G079500	Glyma.16G079500	mixed_up_down	0.998184	1.54987e-13	1
	Glyma.03G094800	82	Glyma.03G094800	Glyma.03G094800	mixed_up_down	Glyma.16G129600	76	Glyma.16G129600	Glyma.16G129600	mixed_up_down	0.994012	6.00462e-11	1
	Glyma.03G094800	82	Glyma.03G094800	Glyma.03G094800	mixed_up_down	Glyma.17G008500	66	Glyma.17G008500	Glyma.17G008500	down	0.994462	4.0659e-11	1
	Glyma.03G094800	82	Glyma.03G094800	Glyma.03G094800	mixed_up_down	Glyma.17G027300	82	Glyma.17G027300	Glyma.17G027300	mixed_up_down	0.999902	0	1
	Glyma.03G094800	82	Glyma.03G094800	Glyma.03G094800	mixed_up_down	Glyma.17G036100	65	Glyma.17G036100	Glyma.17G036100	mixed_up_down	0.996256	5.75584e-12	1
	Glyma.03G094800	82	Glyma.03G094800	Glyma.03G094800	mixed_up_down	Glyma.17G106100	84	Glyma.17G106100	Glyma.17G106100	mixed_up_down	0.99782	3.86358e-13	1
	Glyma.03G094800	82	Glyma.03G094800	Glyma.03G094800	mixed_up_down	Glyma.17G139400	82	Glyma.17G139400	Glyma.17G139400	mixed_up_down	0.999987	0	1
	Glyma.03G094800	82	Glyma.03G094800	Glyma.03G094800	mixed_up_down	Glyma.17G157400	83	Glyma.17G157400	Glyma.17G157400	mixed_up_down	0.999597	0	1
	Glyma.03G094800	82	Glyma.03G094800	Glyma.03G094800	mixed_up_down	Glyma.17G252400	62	Glyma.17G252400	Glyma.17G252400	mixed_up_down	0.992684	1.63098e-10	1
	Glyma.03G094800	82	Glyma.03G094800	Glyma.03G094800	mixed_up_down	Glyma.18G019300	75	Glyma.18G019300	Glyma.18G019300	mixed_up_down	0.992648	1.67039e-10	1
	Glyma.03G094800	82	Glyma.03G094800	Glyma.03G094800	mixed_up_down	Glyma.18G054000	82	Glyma.18G054000	Glyma.18G054000	up	0.999954	0	1
	Glyma.03G094800	82	Glyma.03G094800	Glyma.03G094800	mixed_up_down	Glyma.18G215100	85	Glyma.18G215100	Glyma.18G215100	mixed_up_down	0.999514	2.22045e-16	1
	Glyma.03G094800	82	Glyma.03G094800	Glyma.03G094800	mixed_up_down	Glyma.18G225000	82	Glyma.18G225000	Glyma.18G225000	mixed_up_down	0.999995	0	1
	Glyma.03G094800	82	Glyma.03G094800	Glyma.03G094800	mixed_up_down	Glyma.19G019600	82	Glyma.19G019600	Glyma.19G019600	mixed_up_down	0.996395	4.76552e-12	1
	Glyma.03G094800	82	Glyma.03G094800	Glyma.03G094800	mixed_up_down	Glyma.19G161100	84	Glyma.19G161100	Glyma.19G161100	down	0.998157	1.66755e-13	1
	Glyma.03G094800	82	Glyma.03G094800	Glyma.03G094800	mixed_up_down	Glyma.20G034100	81	Glyma.20G034100	Glyma.20G034100	mixed_up_down	0.999203	2.66454e-15	1
	Glyma.03G094800	82	Glyma.03G094800	Glyma.03G094800	mixed_up_down	Glyma.20G246300	83	Glyma.20G246300	Glyma.20G246300	mixed_up_down	0.999442	4.44089e-16	1
	Glyma.03G094800	82	Glyma.03G094800	Glyma.03G094800	mixed_up_down	Glyma.20G247400	84	Glyma.20G247400	Glyma.20G247400	mixed_up_down	0.999908	0	1
	Glyma.03G094800	82	Glyma.03G094800	Glyma.03G094800	mixed_up_down	XLOC_001320	76	XLOC_001320	XLOC_001320	down	0.995613	1.26996e-11	1
	Glyma.03G094800	82	Glyma.03G094800	Glyma.03G094800	mixed_up_down	XLOC_029029	82	XLOC_029029	XLOC_029029	mixed_up_down	1	0	1
162	Glyma.03G097300	2	Glyma.03G097300	Glyma.03G097300	mixed_up_down	Glyma.04G105200	2	Glyma.04G105200	Glyma.04G105200	up	0.995607	1.27949e-11	1
	Glyma.03G097300	2	Glyma.03G097300	Glyma.03G097300	mixed_up_down	Glyma.08G217400	3	Glyma.08G217400	Glyma.08G217400	down	0.998333	1.0103e-13	1
163	Glyma.03G108500	4	Glyma.03G108500	Glyma.03G108500	mixed_up_down	Glyma.05G233700	9	Glyma.05G233700	Glyma.05G233700	mixed_up_down	0.998108	1.9007e-13	1
	Glyma.03G108500	4	Glyma.03G108500	Glyma.03G108500	mixed_up_down	Glyma.12G130000	8	Glyma.12G130000	Glyma.12G130000	mixed_up_down	0.995966	8.35643e-12	1
	Glyma.03G108500	4	Glyma.03G108500	Glyma.03G108500	mixed_up_down	Glyma.19G045800	10	Glyma.19G045800	Glyma.19G045800	mixed_up_down	0.991322	3.82098e-10	1
	Glyma.03G108500	4	Glyma.03G108500	Glyma.03G108500	mixed_up_down	Glyma.20G031200	9	Glyma.20G031200	Glyma.20G031200	mixed_up_down	0.995957	8.4448e-12	1
164	Glyma.03G117500	1	Glyma.03G117500	Glyma.03G117500	up	Glyma.15G076200	1	Glyma.15G076200	Glyma.15G076200	mixed_up_down	0.997262	1.20681e-12	1
165	Glyma.03G122100	6	Glyma.03G122100	Glyma.03G122100	down	Glyma.03G142800	7	Glyma.03G142800	Glyma.03G142800	mixed_up_down	0.992998	1.31022e-10	1
	Glyma.03G122100	6	Glyma.03G122100	Glyma.03G122100	down	Glyma.05G016000	11	Glyma.05G016000	Glyma.05G016000	mixed_up_down	0.992564	1.76831e-10	1
	Glyma.03G122100	6	Glyma.03G122100	Glyma.03G122100	down	Glyma.16G175600	5	Glyma.16G175600	Glyma.16G175600	mixed_up_down	0.994753	3.10414e-11	1
	Glyma.03G122100	6	Glyma.03G122100	Glyma.03G122100	down	Glyma.17G006800	10	Glyma.17G006800	Glyma.17G006800	mixed_up_down	0.995271	1.84872e-11	1
	Glyma.03G122100	6	Glyma.03G122100	Glyma.03G122100	down	Glyma.19G260600	16	Glyma.19G260600	Glyma.19G260600	mixed_up_down	0.992924	1.38066e-10	1
166	Glyma.03G123100	2	Glyma.03G123100	Glyma.03G123100	mixed_up_down	Glyma.03G231500	6	Glyma.03G231500	Glyma.03G231500	mixed_up_down	0.990729	5.30972e-10	1
	Glyma.03G123100	2	Glyma.03G123100	Glyma.03G123100	mixed_up_down	Glyma.16G199500	9	Glyma.16G199500	Glyma.16G199500	mixed_up_down	0.992652	1.66589e-10	1
167	Glyma.03G127800	7	Glyma.03G127800	Glyma.03G127800	mixed_up_down	Glyma.03G170300	11	Glyma.03G170300	Glyma.03G170300	mixed_up_down	0.998886	1.33227e-14	1
	Glyma.03G127800	7	Glyma.03G127800	Glyma.03G127800	mixed_up_down	Glyma.08G161400	12	Glyma.08G161400	Glyma.08G161400	mixed_up_down	0.99432	4.61051e-11	1
	Glyma.03G127800	7	Glyma.03G127800	Glyma.03G127800	mixed_up_down	Glyma.12G091900	3	Glyma.12G091900	Glyma.12G091900	mixed_up_down	0.993951	6.31228e-11	1
	Glyma.03G127800	7	Glyma.03G127800	Glyma.03G127800	mixed_up_down	Glyma.16G154700	9	Glyma.16G154700	Glyma.16G154700	mixed_up_down	0.991827	2.83367e-10	1
	Glyma.03G127800	7	Glyma.03G127800	Glyma.03G127800	mixed_up_down	Glyma.17G176200	9	Glyma.17G176200	Glyma.17G176200	mixed_up_down	0.991271	3.93406e-10	1
	Glyma.03G127800	7	Glyma.03G127800	Glyma.03G127800	mixed_up_down	Glyma.17G233100	9	Glyma.17G233100	Glyma.17G233100	mixed_up_down	0.998526	5.4623e-14	1
168	Glyma.03G131100	4	Glyma.03G131100	Glyma.03G131100	mixed_up_down	Glyma.06G055900	10	Glyma.06G055900	Glyma.06G055900	mixed_up_down	0.990338	6.52503e-10	1
	Glyma.03G131100	4	Glyma.03G131100	Glyma.03G131100	mixed_up_down	Glyma.06G105500	8	Glyma.06G105500	Glyma.06G105500	mixed_up_down	0.991628	3.19467e-10	1
	Glyma.03G131100	4	Glyma.03G131100	Glyma.03G131100	mixed_up_down	Glyma.08G174700	12	Glyma.08G174700	Glyma.08G174700	mixed_up_down	0.991434	3.58034e-10	1
169	Glyma.03G132700	8	Glyma.03G132700	Glyma.03G132700	down	Glyma.05G152500	17	Glyma.05G152500	Glyma.05G152500	mixed_up_down	0.991145	4.22371e-10	1
	Glyma.03G132700	8	Glyma.03G132700	Glyma.03G132700	down	Glyma.06G247100	9	Glyma.06G247100	Glyma.06G247100	mixed_up_down	0.991063	4.42385e-10	1
	Glyma.03G132700	8	Glyma.03G132700	Glyma.03G132700	down	Glyma.07G205400	10	Glyma.07G205400	Glyma.07G205400	mixed_up_down	0.992546	1.78925e-10	1
	Glyma.03G132700	8	Glyma.03G132700	Glyma.03G132700	down	Glyma.10G168100	10	Glyma.10G168100	Glyma.10G168100	mixed_up_down	0.994083	5.65563e-11	1
	Glyma.03G132700	8	Glyma.03G132700	Glyma.03G132700	down	Glyma.16G027200	11	Glyma.16G027200	Glyma.16G027200	mixed_up_down	0.991487	3.47097e-10	1
	Glyma.03G132700	8	Glyma.03G132700	Glyma.03G132700	down	Glyma.16G175200	6	Glyma.16G175200	Glyma.16G175200	mixed_up_down	0.99618	6.36735e-12	1
	Glyma.03G132700	8	Glyma.03G132700	Glyma.03G132700	down	Glyma.20G150100	6	Glyma.20G150100	Glyma.20G150100	mixed_up_down	0.997138	1.50546e-12	1
170	Glyma.03G135100	10	Glyma.03G135100	Glyma.03G135100	mixed_up_down	Glyma.03G166300	15	Glyma.03G166300	Glyma.03G166300	mixed_up_down	0.99101	4.5546e-10	1
	Glyma.03G135100	10	Glyma.03G135100	Glyma.03G135100	mixed_up_down	Glyma.03G200600	16	Glyma.03G200600	Glyma.03G200600	mixed_up_down	0.990193	7.02908e-10	1
	Glyma.03G135100	10	Glyma.03G135100	Glyma.03G135100	mixed_up_down	Glyma.03G239800	6	Glyma.03G239800	Glyma.03G239800	up	0.995437	1.54543e-11	1
	Glyma.03G135100	10	Glyma.03G135100	Glyma.03G135100	mixed_up_down	Glyma.07G091400	8	Glyma.07G091400	Glyma.07G091400	mixed_up_down	0.991187	4.12554e-10	1
	Glyma.03G135100	10	Glyma.03G135100	Glyma.03G135100	mixed_up_down	Glyma.10G080700	10	Glyma.10G080700	Glyma.10G080700	mixed_up_down	0.996266	5.68168e-12	1
	Glyma.03G135100	10	Glyma.03G135100	Glyma.03G135100	mixed_up_down	Glyma.12G117700	6	Glyma.12G117700	Glyma.12G117700	mixed_up_down	0.993556	8.6595e-11	1
	Glyma.03G135100	10	Glyma.03G135100	Glyma.03G135100	mixed_up_down	Glyma.14G168800	6	Glyma.14G168800	Glyma.14G168800	up	0.990517	5.94285e-10	1
	Glyma.03G135100	10	Glyma.03G135100	Glyma.03G135100	mixed_up_down	Glyma.16G020200	6	Glyma.16G020200	Glyma.16G020200	up	0.994913	2.66112e-11	1
	Glyma.03G135100	10	Glyma.03G135100	Glyma.03G135100	mixed_up_down	XLOC_009033	12	XLOC_009033	XLOC_009033	mixed_up_down	0.997474	8.05578e-13	1
171	Glyma.03G135800	1	Glyma.03G135800	Glyma.03G135800	mixed_up_down	XLOC_010715	1	XLOC_010715	XLOC_010715	up	0.992523	1.81752e-10	1
172	Glyma.03G142400	1	Glyma.03G142400	Glyma.03G142400	mixed_up_down	Glyma.10G006700	1	Glyma.10G006700	Glyma.10G006700	up	0.994761	3.0824e-11	1
173	Glyma.03G142800	7	Glyma.03G142800	Glyma.03G142800	mixed_up_down	Glyma.06G109300	4	Glyma.06G109300	Glyma.06G109300	mixed_up_down	0.990811	5.08007e-10	1
	Glyma.03G142800	7	Glyma.03G142800	Glyma.03G142800	mixed_up_down	Glyma.16G028500	14	Glyma.16G028500	Glyma.16G028500	mixed_up_down	0.99075	5.25227e-10	1
	Glyma.03G142800	7	Glyma.03G142800	Glyma.03G142800	mixed_up_down	Glyma.16G175600	5	Glyma.16G175600	Glyma.16G175600	mixed_up_down	0.990034	7.61352e-10	1
	Glyma.03G142800	7	Glyma.03G142800	Glyma.03G142800	mixed_up_down	Glyma.17G006800	10	Glyma.17G006800	Glyma.17G006800	mixed_up_down	0.995001	2.4392e-11	1
	Glyma.03G142800	7	Glyma.03G142800	Glyma.03G142800	mixed_up_down	Glyma.19G260600	16	Glyma.19G260600	Glyma.19G260600	mixed_up_down	0.990574	5.76984e-10	1
174	Glyma.03G157400	26	Glyma.03G157400	Glyma.03G157400	mixed_up_down	Glyma.04G015400	22	Glyma.04G015400	Glyma.04G015400	mixed_up_down	0.993082	1.23358e-10	1
	Glyma.03G157400	26	Glyma.03G157400	Glyma.03G157400	mixed_up_down	Glyma.04G015900	19	Glyma.04G015900	Glyma.04G015900	mixed_up_down	0.996068	7.35678e-12	1
	Glyma.03G157400	26	Glyma.03G157400	Glyma.03G157400	mixed_up_down	Glyma.04G056000	20	Glyma.04G056000	Glyma.04G056000	up	0.991525	3.39383e-10	1
	Glyma.03G157400	26	Glyma.03G157400	Glyma.03G157400	mixed_up_down	Glyma.04G102800	8	Glyma.04G102800	Glyma.04G102800	mixed_up_down	0.991311	3.84364e-10	1
	Glyma.03G157400	26	Glyma.03G157400	Glyma.03G157400	mixed_up_down	Glyma.04G167400	15	Glyma.04G167400	Glyma.04G167400	mixed_up_down	0.990459	6.12852e-10	1
	Glyma.03G157400	26	Glyma.03G157400	Glyma.03G157400	mixed_up_down	Glyma.04G240000	20	Glyma.04G240000	Glyma.04G240000	mixed_up_down	0.992433	1.92943e-10	1
	Glyma.03G157400	26	Glyma.03G157400	Glyma.03G157400	mixed_up_down	Glyma.06G015900	16	Glyma.06G015900	Glyma.06G015900	down	0.99459	3.61813e-11	1
	Glyma.03G157400	26	Glyma.03G157400	Glyma.03G157400	mixed_up_down	Glyma.06G130900	13	Glyma.06G130900	Glyma.06G130900	mixed_up_down	0.991172	4.16139e-10	1
	Glyma.03G157400	26	Glyma.03G157400	Glyma.03G157400	mixed_up_down	Glyma.06G309000	9	Glyma.06G309000	Glyma.06G309000	mixed_up_down	0.990346	6.49964e-10	1
	Glyma.03G157400	26	Glyma.03G157400	Glyma.03G157400	mixed_up_down	Glyma.07G163600	13	Glyma.07G163600	Glyma.07G163600	mixed_up_down	0.992596	1.73105e-10	1
	Glyma.03G157400	26	Glyma.03G157400	Glyma.03G157400	mixed_up_down	Glyma.07G201300	20	Glyma.07G201300	Glyma.07G201300	mixed_up_down	0.992956	1.34932e-10	1
	Glyma.03G157400	26	Glyma.03G157400	Glyma.03G157400	mixed_up_down	Glyma.08G204800	16	Glyma.08G204800	Glyma.08G204800	mixed_up_down	0.993755	7.39973e-11	1
	Glyma.03G157400	26	Glyma.03G157400	Glyma.03G157400	mixed_up_down	Glyma.08G286800	21	Glyma.08G286800	Glyma.08G286800	mixed_up_down	0.991382	3.69053e-10	1
	Glyma.03G157400	26	Glyma.03G157400	Glyma.03G157400	mixed_up_down	Glyma.11G102300	24	Glyma.11G102300	Glyma.11G102300	mixed_up_down	0.994109	5.53215e-11	1
	Glyma.03G157400	26	Glyma.03G157400	Glyma.03G157400	mixed_up_down	Glyma.11G121100	15	Glyma.11G121100	Glyma.11G121100	mixed_up_down	0.992706	1.60589e-10	1
	Glyma.03G157400	26	Glyma.03G157400	Glyma.03G157400	mixed_up_down	Glyma.13G268100	12	Glyma.13G268100	Glyma.13G268100	up	0.993146	1.17804e-10	1
	Glyma.03G157400	26	Glyma.03G157400	Glyma.03G157400	mixed_up_down	Glyma.13G356100	17	Glyma.13G356100	Glyma.13G356100	mixed_up_down	0.997651	5.60885e-13	1
	Glyma.03G157400	26	Glyma.03G157400	Glyma.03G157400	mixed_up_down	Glyma.14G177200	21	Glyma.14G177200	Glyma.14G177200	mixed_up_down	0.992372	2.00802e-10	1
	Glyma.03G157400	26	Glyma.03G157400	Glyma.03G157400	mixed_up_down	Glyma.15G250800	16	Glyma.15G250800	Glyma.15G250800	mixed_up_down	0.990384	6.37264e-10	1
	Glyma.03G157400	26	Glyma.03G157400	Glyma.03G157400	mixed_up_down	Glyma.15G273300	16	Glyma.15G273300	Glyma.15G273300	mixed_up_down	0.992026	2.50517e-10	1
	Glyma.03G157400	26	Glyma.03G157400	Glyma.03G157400	mixed_up_down	Glyma.18G247600	18	Glyma.18G247600	Glyma.18G247600	mixed_up_down	0.994743	3.13425e-11	1
	Glyma.03G157400	26	Glyma.03G157400	Glyma.03G157400	mixed_up_down	Glyma.19G030200	21	Glyma.19G030200	Glyma.19G030200	mixed_up_down	0.994308	4.66129e-11	1
	Glyma.03G157400	26	Glyma.03G157400	Glyma.03G157400	mixed_up_down	Glyma.19G244500	19	Glyma.19G244500	Glyma.19G244500	mixed_up_down	0.992469	1.88356e-10	1
	Glyma.03G157400	26	Glyma.03G157400	Glyma.03G157400	mixed_up_down	Glyma.20G155600	25	Glyma.20G155600	Glyma.20G155600	mixed_up_down	0.998711	2.79776e-14	1
	Glyma.03G157400	26	Glyma.03G157400	Glyma.03G157400	mixed_up_down	Glyma.20G214000	20	Glyma.20G214000	Glyma.20G214000	mixed_up_down	0.994111	5.52312e-11	1
175	Glyma.03G158200	12	Glyma.03G158200	Glyma.03G158200	mixed_up_down	Glyma.04G109400	19	Glyma.04G109400	Glyma.04G109400	mixed_up_down	0.996412	4.6545e-12	1
	Glyma.03G158200	12	Glyma.03G158200	Glyma.03G158200	mixed_up_down	Glyma.05G132000	16	Glyma.05G132000	Glyma.05G132000	mixed_up_down	0.996679	3.16502e-12	1
	Glyma.03G158200	12	Glyma.03G158200	Glyma.03G158200	mixed_up_down	Glyma.06G083200	7	Glyma.06G083200	Glyma.06G083200	mixed_up_down	0.998303	1.10578e-13	1
	Glyma.03G158200	12	Glyma.03G158200	Glyma.03G158200	mixed_up_down	Glyma.06G165700	18	Glyma.06G165700	Glyma.06G165700	mixed_up_down	0.992232	2.19829e-10	1
	Glyma.03G158200	12	Glyma.03G158200	Glyma.03G158200	mixed_up_down	Glyma.06G325100	20	Glyma.06G325100	Glyma.06G325100	mixed_up_down	0.993536	8.79026e-11	1
	Glyma.03G158200	12	Glyma.03G158200	Glyma.03G158200	mixed_up_down	Glyma.09G249400	21	Glyma.09G249400	Glyma.09G249400	mixed_up_down	0.993441	9.45231e-11	1
	Glyma.03G158200	12	Glyma.03G158200	Glyma.03G158200	mixed_up_down	Glyma.10G274300	15	Glyma.10G274300	Glyma.10G274300	mixed_up_down	0.99137	3.71673e-10	1
	Glyma.03G158200	12	Glyma.03G158200	Glyma.03G158200	mixed_up_down	Glyma.13G204800	21	Glyma.13G204800	Glyma.13G204800	mixed_up_down	0.993521	8.89253e-11	1
	Glyma.03G158200	12	Glyma.03G158200	Glyma.03G158200	mixed_up_down	Glyma.15G102000	18	Glyma.15G102000	Glyma.15G102000	mixed_up_down	0.99236	2.02351e-10	1
	Glyma.03G158200	12	Glyma.03G158200	Glyma.03G158200	mixed_up_down	Glyma.15G179400	5	Glyma.15G179400	Glyma.15G179400	mixed_up_down	0.99639	4.79661e-12	1
	Glyma.03G158200	12	Glyma.03G158200	Glyma.03G158200	mixed_up_down	Glyma.15G275900	15	Glyma.15G275900	Glyma.15G275900	mixed_up_down	0.992143	2.32791e-10	1
	Glyma.03G158200	12	Glyma.03G158200	Glyma.03G158200	mixed_up_down	Glyma.20G002000	15	Glyma.20G002000	Glyma.20G002000	mixed_up_down	0.994026	5.93166e-11	1
176	Glyma.03G158600	84	Glyma.03G158600	Glyma.03G158600	mixed_up_down	Glyma.03G158700	80	Glyma.03G158700	Glyma.03G158700	down	0.995185	2.02232e-11	1
	Glyma.03G158600	84	Glyma.03G158600	Glyma.03G158600	mixed_up_down	Glyma.03G210700	82	Glyma.03G210700	Glyma.03G210700	mixed_up_down	0.998559	4.88498e-14	1
	Glyma.03G158600	84	Glyma.03G158600	Glyma.03G158600	mixed_up_down	Glyma.04G014000	46	Glyma.04G014000	Glyma.04G014000	up	0.992042	2.47995e-10	1
	Glyma.03G158600	84	Glyma.03G158600	Glyma.03G158600	mixed_up_down	Glyma.04G024400	66	Glyma.04G024400	Glyma.04G024400	mixed_up_down	0.993587	8.45142e-11	1
	Glyma.03G158600	84	Glyma.03G158600	Glyma.03G158600	mixed_up_down	Glyma.04G046600	37	Glyma.04G046600	Glyma.04G046600	mixed_up_down	0.990479	6.06483e-10	1
	Glyma.03G158600	84	Glyma.03G158600	Glyma.03G158600	mixed_up_down	Glyma.04G094800	82	Glyma.04G094800	Glyma.04G094800	mixed_up_down	0.999875	0	1
	Glyma.03G158600	84	Glyma.03G158600	Glyma.03G158600	mixed_up_down	Glyma.05G037200	83	Glyma.05G037200	Glyma.05G037200	mixed_up_down	0.999458	4.44089e-16	1
	Glyma.03G158600	84	Glyma.03G158600	Glyma.03G158600	mixed_up_down	Glyma.05G056300	81	Glyma.05G056300	Glyma.05G056300	mixed_up_down	0.996824	2.53153e-12	1
	Glyma.03G158600	84	Glyma.03G158600	Glyma.03G158600	mixed_up_down	Glyma.05G109600	84	Glyma.05G109600	Glyma.05G109600	mixed_up_down	0.99887	1.44329e-14	1
	Glyma.03G158600	84	Glyma.03G158600	Glyma.03G158600	mixed_up_down	Glyma.05G126400	82	Glyma.05G126400	Glyma.05G126400	up	0.999759	0	1
	Glyma.03G158600	84	Glyma.03G158600	Glyma.03G158600	mixed_up_down	Glyma.05G186300	81	Glyma.05G186300	Glyma.05G186300	mixed_up_down	0.998805	1.90958e-14	1
	Glyma.03G158600	84	Glyma.03G158600	Glyma.03G158600	mixed_up_down	Glyma.05G197900	82	Glyma.05G197900	Glyma.05G197900	up	0.999672	0	1
	Glyma.03G158600	84	Glyma.03G158600	Glyma.03G158600	mixed_up_down	Glyma.06G006800	82	Glyma.06G006800	Glyma.06G006800	mixed_up_down	0.999273	1.55431e-15	1
	Glyma.03G158600	84	Glyma.03G158600	Glyma.03G158600	mixed_up_down	Glyma.06G282200	84	Glyma.06G282200	Glyma.06G282200	mixed_up_down	0.999863	0	1
	Glyma.03G158600	84	Glyma.03G158600	Glyma.03G158600	mixed_up_down	Glyma.06G282400	82	Glyma.06G282400	Glyma.06G282400	mixed_up_down	0.999833	0	1
	Glyma.03G158600	84	Glyma.03G158600	Glyma.03G158600	mixed_up_down	Glyma.06G282500	83	Glyma.06G282500	Glyma.06G282500	mixed_up_down	0.999922	0	1
	Glyma.03G158600	84	Glyma.03G158600	Glyma.03G158600	mixed_up_down	Glyma.06G282600	82	Glyma.06G282600	Glyma.06G282600	mixed_up_down	0.999865	0	1
	Glyma.03G158600	84	Glyma.03G158600	Glyma.03G158600	mixed_up_down	Glyma.06G282700	84	Glyma.06G282700	Glyma.06G282700	mixed_up_down	0.999185	2.66454e-15	1
	Glyma.03G158600	84	Glyma.03G158600	Glyma.03G158600	mixed_up_down	Glyma.06G282900	82	Glyma.06G282900	Glyma.06G282900	up	0.999875	0	1
	Glyma.03G158600	84	Glyma.03G158600	Glyma.03G158600	mixed_up_down	Glyma.06G283800	61	Glyma.06G283800	Glyma.06G283800	mixed_up_down	0.99195	2.62669e-10	1
	Glyma.03G158600	84	Glyma.03G158600	Glyma.03G158600	mixed_up_down	Glyma.06G306900	80	Glyma.06G306900	Glyma.06G306900	mixed_up_down	0.996862	2.38209e-12	1
	Glyma.03G158600	84	Glyma.03G158600	Glyma.03G158600	mixed_up_down	Glyma.08G009900	82	Glyma.08G009900	Glyma.08G009900	mixed_up_down	0.997897	3.22853e-13	1
	Glyma.03G158600	84	Glyma.03G158600	Glyma.03G158600	mixed_up_down	Glyma.08G155400	82	Glyma.08G155400	Glyma.08G155400	mixed_up_down	0.999875	0	1
	Glyma.03G158600	84	Glyma.03G158600	Glyma.03G158600	mixed_up_down	Glyma.08G155500	82	Glyma.08G155500	Glyma.08G155500	mixed_up_down	0.999875	0	1
	Glyma.03G158600	84	Glyma.03G158600	Glyma.03G158600	mixed_up_down	Glyma.08G155700	85	Glyma.08G155700	Glyma.08G155700	mixed_up_down	0.99962	0	1
	Glyma.03G158600	84	Glyma.03G158600	Glyma.03G158600	mixed_up_down	Glyma.08G232200	84	Glyma.08G232200	Glyma.08G232200	mixed_up_down	0.999991	0	1
	Glyma.03G158600	84	Glyma.03G158600	Glyma.03G158600	mixed_up_down	Glyma.08G328600	80	Glyma.08G328600	Glyma.08G328600	mixed_up_down	0.998626	3.84137e-14	1
	Glyma.03G158600	84	Glyma.03G158600	Glyma.03G158600	mixed_up_down	Glyma.08G342300	82	Glyma.08G342300	Glyma.08G342300	mixed_up_down	0.999875	0	1
	Glyma.03G158600	84	Glyma.03G158600	Glyma.03G158600	mixed_up_down	Glyma.09G087400	71	Glyma.09G087400	Glyma.09G087400	up	0.995591	1.30282e-11	1
	Glyma.03G158600	84	Glyma.03G158600	Glyma.03G158600	mixed_up_down	Glyma.09G117900	74	Glyma.09G117900	Glyma.09G117900	down	0.996863	2.3781e-12	1
	Glyma.03G158600	84	Glyma.03G158600	Glyma.03G158600	mixed_up_down	Glyma.09G221800	82	Glyma.09G221800	Glyma.09G221800	mixed_up_down	0.999819	0	1
	Glyma.03G158600	84	Glyma.03G158600	Glyma.03G158600	mixed_up_down	Glyma.10G017000	82	Glyma.10G017000	Glyma.10G017000	mixed_up_down	0.999875	0	1
	Glyma.03G158600	84	Glyma.03G158600	Glyma.03G158600	mixed_up_down	Glyma.10G056300	77	Glyma.10G056300	Glyma.10G056300	mixed_up_down	0.995938	8.65086e-12	1
	Glyma.03G158600	84	Glyma.03G158600	Glyma.03G158600	mixed_up_down	Glyma.10G296600	84	Glyma.10G296600	Glyma.10G296600	mixed_up_down	0.999823	0	1
	Glyma.03G158600	84	Glyma.03G158600	Glyma.03G158600	mixed_up_down	Glyma.11G119000	62	Glyma.11G119000	Glyma.11G119000	up	0.992661	1.65589e-10	1
	Glyma.03G158600	84	Glyma.03G158600	Glyma.03G158600	mixed_up_down	Glyma.11G120600	82	Glyma.11G120600	Glyma.11G120600	mixed_up_down	0.999405	4.44089e-16	1
	Glyma.03G158600	84	Glyma.03G158600	Glyma.03G158600	mixed_up_down	Glyma.11G179100	82	Glyma.11G179100	Glyma.11G179100	mixed_up_down	0.999371	8.88178e-16	1
	Glyma.03G158600	84	Glyma.03G158600	Glyma.03G158600	mixed_up_down	Glyma.11G238000	81	Glyma.11G238000	Glyma.11G238000	mixed_up_down	0.998614	4.01901e-14	1
	Glyma.03G158600	84	Glyma.03G158600	Glyma.03G158600	mixed_up_down	Glyma.12G122300	83	Glyma.12G122300	Glyma.12G122300	up	0.999387	6.66134e-16	1
	Glyma.03G158600	84	Glyma.03G158600	Glyma.03G158600	mixed_up_down	Glyma.12G124100	82	Glyma.12G124100	Glyma.12G124100	mixed_up_down	0.999875	0	1
	Glyma.03G158600	84	Glyma.03G158600	Glyma.03G158600	mixed_up_down	Glyma.12G124200	82	Glyma.12G124200	Glyma.12G124200	mixed_up_down	0.999875	0	1
	Glyma.03G158600	84	Glyma.03G158600	Glyma.03G158600	mixed_up_down	Glyma.12G124900	82	Glyma.12G124900	Glyma.12G124900	mixed_up_down	0.999875	0	1
	Glyma.03G158600	84	Glyma.03G158600	Glyma.03G158600	mixed_up_down	Glyma.13G091400	82	Glyma.13G091400	Glyma.13G091400	mixed_up_down	0.999875	0	1
	Glyma.03G158600	84	Glyma.03G158600	Glyma.03G158600	mixed_up_down	Glyma.13G165000	85	Glyma.13G165000	Glyma.13G165000	mixed_up_down	0.998978	8.88178e-15	1
	Glyma.03G158600	84	Glyma.03G158600	Glyma.03G158600	mixed_up_down	Glyma.13G218300	81	Glyma.13G218300	Glyma.13G218300	mixed_up_down	0.999428	4.44089e-16	1
	Glyma.03G158600	84	Glyma.03G158600	Glyma.03G158600	mixed_up_down	Glyma.13G240500	83	Glyma.13G240500	Glyma.13G240500	down	0.99984	0	1
	Glyma.03G158600	84	Glyma.03G158600	Glyma.03G158600	mixed_up_down	Glyma.13G319700	84	Glyma.13G319700	Glyma.13G319700	mixed_up_down	0.999979	0	1
	Glyma.03G158600	84	Glyma.03G158600	Glyma.03G158600	mixed_up_down	Glyma.14G014200	78	Glyma.14G014200	Glyma.14G014200	mixed_up_down	0.996099	7.07101e-12	1
	Glyma.03G158600	84	Glyma.03G158600	Glyma.03G158600	mixed_up_down	Glyma.14G176500	66	Glyma.14G176500	Glyma.14G176500	mixed_up_down	0.996331	5.20606e-12	1
	Glyma.03G158600	84	Glyma.03G158600	Glyma.03G158600	mixed_up_down	Glyma.15G066200	82	Glyma.15G066200	Glyma.15G066200	mixed_up_down	0.999875	0	1
	Glyma.03G158600	84	Glyma.03G158600	Glyma.03G158600	mixed_up_down	Glyma.15G140200	76	Glyma.15G140200	Glyma.15G140200	mixed_up_down	0.995391	1.62483e-11	1
	Glyma.03G158600	84	Glyma.03G158600	Glyma.03G158600	mixed_up_down	Glyma.15G238600	84	Glyma.15G238600	Glyma.15G238600	up	0.999576	0	1
	Glyma.03G158600	84	Glyma.03G158600	Glyma.03G158600	mixed_up_down	Glyma.16G043500	78	Glyma.16G043500	Glyma.16G043500	mixed_up_down	0.996788	2.67741e-12	1
[truncated: 7,639 more rows]
